# Supplementary material for: Rh(iii)-catalyzed atroposelective C–H alkynylation of 1-aryl isoquinolines with hypervalent iodine–alkyne reagents
Source: Royal Society of Chemistry journal article supplement (doi:10.1039/d4cc01785d), 2024-01-01
Supplement: d4cc01785d1.pdf [file d4cc01785d1.pdf]

Supporting Information for

**Rh(III)-Catalyzed Atroposelective C-H Alkynylation of 1-Aryl  
Isoquinolines with Hypervalent Iodine-Alkyne Reagents**

Dong-Song Zheng,<sup>a,b</sup> Fangnuo Zhao,<sup>b</sup> Qing Gu,<sup>b,\*</sup> Shu-Li You<sup>a,b,\*</sup>

<sup>a</sup> Chang-Kung Chuang Institute, East China Normal University, 3663 N. Zhongshan Road, Shanghai 200062, China

<sup>b</sup> New Cornerstone Science Laboratory, State Key Laboratory of Organometallic Chemistry, Shanghai Institute of Organic Chemistry, Chinese Academy of Sciences, 345 Lingling Lu, Shanghai, 200032, China

E-mail: qinggu@sioc.ac.cn; slyou@sioc.ac.cn

**Table of Contents**

|                                                                                                         |     |
|---------------------------------------------------------------------------------------------------------|-----|
| 1. General Information .....                                                                            | S2  |
| 2. Complete Condition Optimization .....                                                                | S3  |
| 3. General Procedure for Rh-Catalyzed Atroposelective C-H Alkynylation of 1-Aryl Isoquinolines<br>..... | S9  |
| 4. Synthetic Transformations .....                                                                      | S21 |
| 5. Mechanistic Studies .....                                                                            | S26 |
| 5.1 Deuterium labelling study with D <sub>2</sub> O .....                                               | S26 |
| 5.2 Intermolecular kinetic isotope effect of 1-(naphthalen-1-yl)benzo[h]isoquinoline.....               | S27 |
| 5.3 Plausible Catalytic Cycle .....                                                                     | S28 |
| 6. Copies of NMR Spectra .....                                                                          | S29 |
| 7. Copies of HPLC Chromatograms .....                                                                   | S83 |

## 1. General Information

Unless otherwise noted, materials were purchased from commercial suppliers and used without further purification. All the solvents were treated according to standard methods. Flash column chromatography was performed using 200-300 mesh silica gel.  $^1\text{H}$  and  $^{13}\text{C}$  NMR spectra were recorded on a Varian instrument (400 MHz and 100 MHz, respectively) or an Agilent instrument (400, 600 MHz and 100, 151 MHz, respectively) and internally referenced to tetramethylsilane signal or residual protio-solvent signals. Data for  $^1\text{H}$  NMR are recorded as follows: chemical shift ( $\delta$ , ppm), multiplicity (s = singlet, d = doublet, t = triplet, sept = septet, m = multiplet or unresolved, br = broad singlet, coupling constant (s) in Hz, integration). Data for  $^{13}\text{C}$  NMR and  $^{19}\text{F}$  NMR are reported in terms of chemical shift ( $\delta$ , ppm). All air- and moisture-sensitive reactions were performed under an atmosphere of argon in flame-dried glassware.

## 2. Complete Condition Optimization

**Table S1.** Screening of CpRh complexes<sup>a,b</sup>

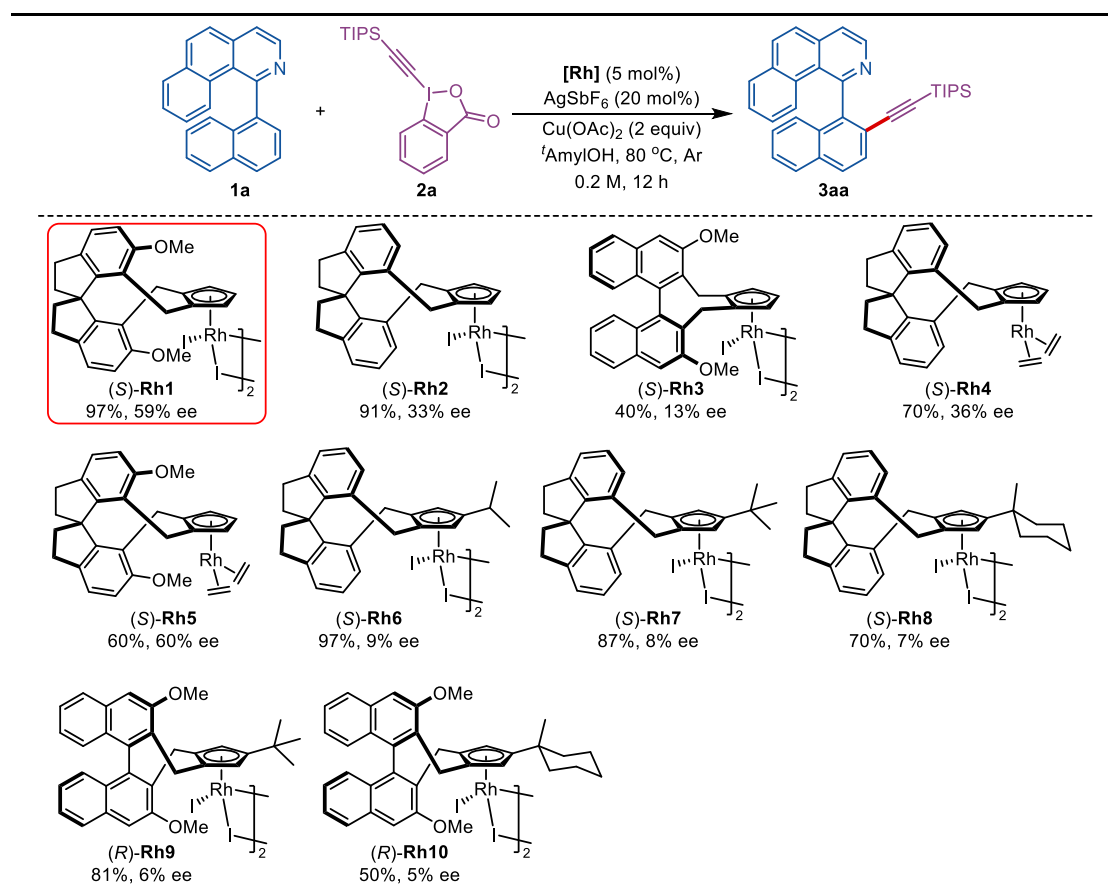

<sup>a</sup> Reaction conditions: **1a** (0.05 mmol), **2a** (0.1 mmol), **[Rh]** (5 mol%), **AgSbF<sub>6</sub>** (20 mol%), **Cu(OAc)<sub>2</sub>** (0.1 mmol) in *t*AmylOH (0.25 mL). <sup>b</sup> Isolated yield. The ee values were determined by HPLC analysis on a chiral stationary phase.

**Table S2.** Solvent effect<sup>a</sup>

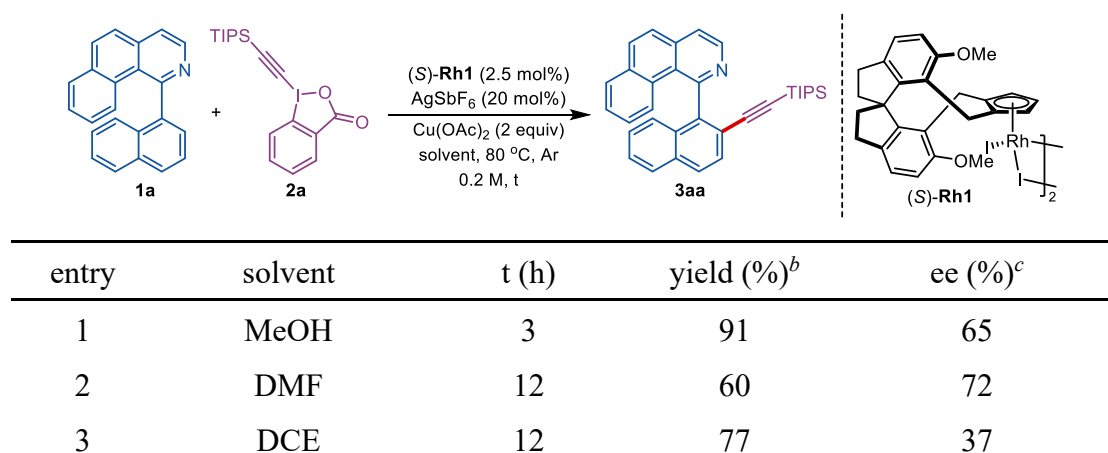

|           |                     |           |           |           |
|-----------|---------------------|-----------|-----------|-----------|
| 4         | HFIP                | 3         | 93        | 10        |
| 5         | <sup>t</sup> AmylOH | 12        | 97        | 59        |
| 6         | toluene             | 12        | 74        | 52        |
| 7         | dioxane             | 3         | 91        | 53        |
| 8         | MeCN                | 12        | 86        | 54        |
| 9         | THF                 | 3         | 98        | 50        |
| <b>10</b> | <b>DMA</b>          | <b>12</b> | <b>86</b> | <b>72</b> |

<sup>a</sup> Reaction conditions: **1a** (0.05 mmol), **2a** (0.1 mmol), (*S*)-**Rh1** (2.5 mol%), AgSbF<sub>6</sub> (20 mol%), Cu(OAc)<sub>2</sub> (0.1 mmol) in solvent (0.25 mL). <sup>b</sup> Isolated yield. <sup>c</sup> The ee values were determined by HPLC analysis on a chiral stationary phase.

**Table S3.** Screening of silver salts<sup>a</sup>

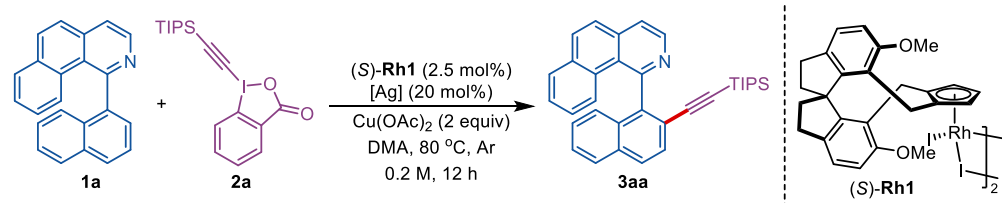

| entry    | [Ag]                            | yield (%) <sup>b</sup> | ee (%) <sup>c</sup> |
|----------|---------------------------------|------------------------|---------------------|
| <b>1</b> | <b>AgSbF<sub>6</sub></b>        | <b>86</b>              | <b>72</b>           |
| 2        | AgBF <sub>4</sub>               | 21                     | 75                  |
| 3        | AgNTf <sub>2</sub>              | 92                     | 70                  |
| 4        | AgOTf                           | 89                     | 69                  |
| 5        | AgPF <sub>6</sub>               | 66                     | 73                  |
| 6        | AgNO <sub>3</sub>               | 24                     | 65                  |
| 7        | AgF                             | 12                     | 15                  |
| 8        | AgOAc                           | 20                     | 32                  |
| 9        | <sup>t</sup> PrCOOAg            | 11                     | 25                  |
| 10       | Ag <sub>2</sub> CO <sub>3</sub> | 21                     | 57                  |

<sup>a</sup> Reaction conditions: **1a** (0.05 mmol), **2a** (0.1 mmol), (*S*)-**Rh1** (2.5 mol%), [Ag] (20 mol%), Cu(OAc)<sub>2</sub> (0.1 mmol) in DMA (0.25 mL). <sup>b</sup> Isolated yield. <sup>c</sup> The ee values were determined by HPLC analysis on a chiral stationary phase.

**Table S4.** Screening of copper salts or zinc salts<sup>a</sup>

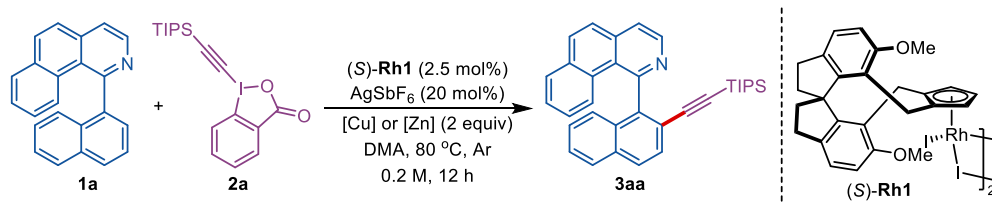

| entry    | [Cu] or [Zn]                                         | yield (%) <sup>b</sup> | ee (%) <sup>c</sup> |
|----------|------------------------------------------------------|------------------------|---------------------|
| <b>1</b> | <b>Cu(OAc)<sub>2</sub></b>                           | <b>86</b>              | <b>72</b>           |
| 2        | Cu(OTf) <sub>2</sub>                                 | 95                     | 67                  |
| 3        | Cu(BF <sub>4</sub> ) <sub>2</sub> ·6H <sub>2</sub> O | 14                     | 61                  |
| 4        | Cu(NO <sub>2</sub> ) <sub>2</sub> ·3H <sub>2</sub> O | 30                     | 67                  |
| 5        | CuBr <sub>2</sub>                                    | 16                     | 33                  |
| 6        | CuCl <sub>2</sub>                                    | 27                     | 36                  |
| 7        | Zn(OTf) <sub>2</sub>                                 | 93                     | 65                  |

<sup>a</sup> Reaction conditions: **1a** (0.05 mmol), **2a** (0.1 mmol), (*S*)-**Rh1** (2.5 mol%), AgSbF<sub>6</sub> (20 mol%), [Cu] or [Zn] (0.1 mmol) in DMA (0.25 mL). <sup>b</sup> Isolated yield. <sup>c</sup> The ee values were determined by HPLC analysis on a chiral stationary phase.

**Table S5.** Concentration effect<sup>a</sup>

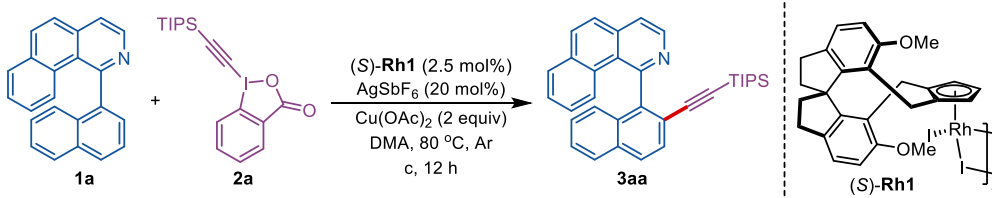

| entry    | c (M)      | yield (%) <sup>b</sup> | ee (%) <sup>c</sup> |
|----------|------------|------------------------|---------------------|
| <b>1</b> | <b>0.2</b> | <b>86</b>              | <b>72</b>           |
| 2        | 0.1        | 88                     | 70                  |
| 3        | 0.05       | 88                     | 71                  |

<sup>a</sup> Reaction conditions: **1a** (0.05 mmol), **2a** (0.1 mmol), (*S*)-**Rh1** (2.5 mol%), AgSbF<sub>6</sub> (20 mol%), Cu(OAc)<sub>2</sub> (0.1 mmol) in DMA (x mL). <sup>b</sup> Isolated yield. <sup>c</sup> The ee values were determined by HPLC analysis on a chiral stationary phase.

**Table S6.** Screening of additives<sup>a</sup>

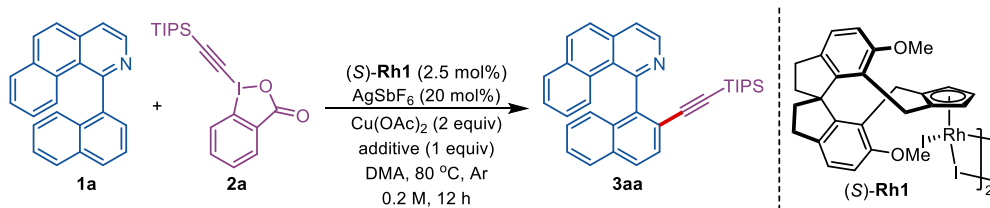

| entry    | additive                 | yield (%) <sup>b</sup> | ee (%) <sup>c</sup> |
|----------|--------------------------|------------------------|---------------------|
| <b>1</b> | -                        | <b>86</b>              | <b>72</b>           |
| 2        | NaOAc                    | 10                     | 11                  |
| 3        | NaOTf                    | 92                     | 69                  |
| 4        | PivOCs                   | 79                     | 58                  |
| 5        | NaBF <sub>4</sub>        | 70                     | 72                  |
| 6        | PivOH                    | 95                     | 61                  |
| 7        | <sup>i</sup> PrCOOH      | 71                     | 63                  |
| 8        | 4-CF <sub>3</sub> PhCOOH | 93                     | 64                  |

<sup>a</sup> Reaction conditions: **1a** (0.05 mmol), **2a** (0.1 mmol), (*S*)-**Rh1** (2.5 mol%), AgSbF<sub>6</sub> (20 mol%), Cu(OAc)<sub>2</sub> (0.1 mmol) and additive (0.05 mmol) in DMA (0.25 mL). <sup>b</sup> Isolated yield. <sup>c</sup> The ee values were determined by HPLC analysis on a chiral stationary phase.

**Table S7.** Temperature effect<sup>a</sup>

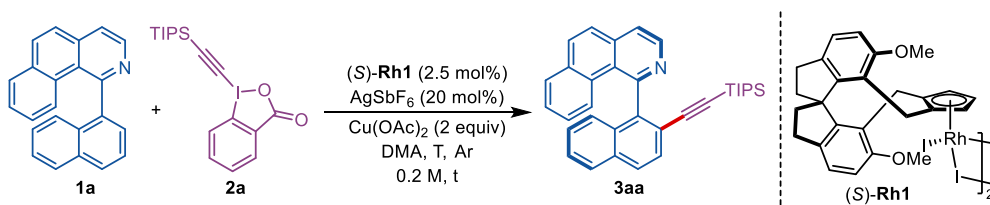

| entry    | T (°C)    | t (h)     | yield (%) <sup>b</sup> | ee (%) <sup>c</sup> |
|----------|-----------|-----------|------------------------|---------------------|
| 1        | 80        | 12        | 86                     | 72                  |
| 2        | 60        | 12        | 91                     | 74                  |
| 3        | 40        | 12        | 88                     | 77                  |
| <b>4</b> | <b>rt</b> | <b>24</b> | <b>86</b>              | <b>78</b>           |
| 5        | 10        | 24        | 59                     | 85                  |
| 6        | 0         | 24        | 46                     | 87                  |
| 7        | 0         | 48        | 51                     | 88                  |
| 8        | -20       | 36        | 22                     | 92                  |

<sup>a</sup> Reaction conditions: **1a** (0.05 mmol), **2a** (0.1 mmol), (*S*)-**Rh1** (2.5 mol%), AgSbF<sub>6</sub> (20 mol%),

Cu(OAc)<sub>2</sub> (0.1 mmol) in DMA (0.25 mL). <sup>b</sup> Isolated yield. <sup>c</sup> The ee values were determined by HPLC analysis on a chiral stationary phase.

**Table S8.** Screening of alkynylated reagents<sup>a,b</sup>

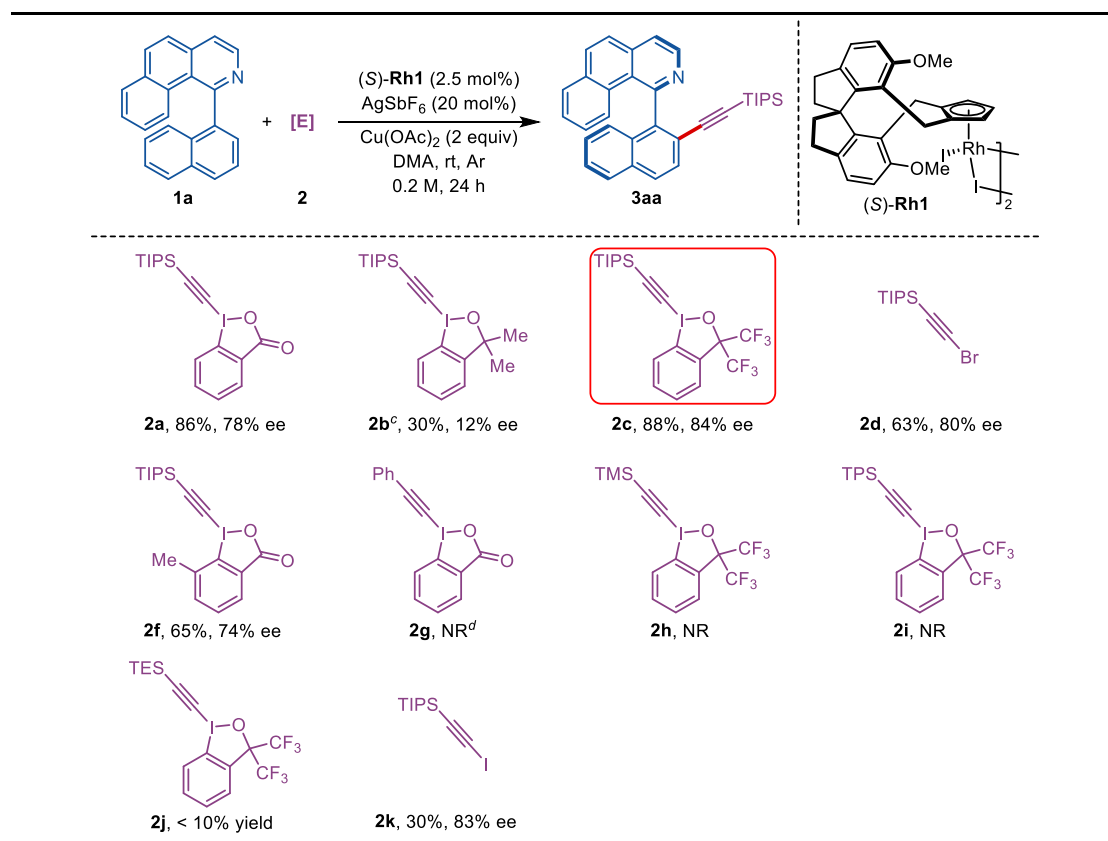

<sup>a</sup> Reaction conditions: **1a** (0.05 mmol), **2** (0.1 mmol), **(S)-Rh1** (2.5 mol%), **AgSbF<sub>6</sub>** (20 mol%), **Cu(OAc)<sub>2</sub>** (0.1 mmol) in **DMA** (0.25 mL). <sup>b</sup> Isolated yield. The ee values were determined by HPLC analysis on a chiral stationary phase. <sup>c</sup> at 80 °C. <sup>d</sup> NR = no reaction.

**Table S9.** Temperature effect<sup>a</sup>

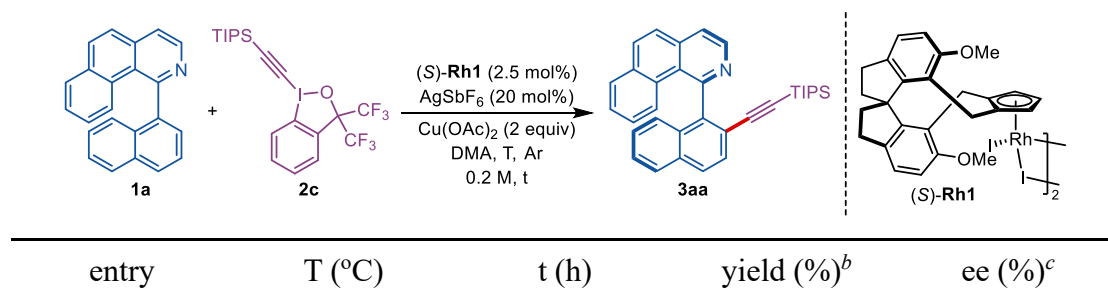

|   |     |    |    |    |
|---|-----|----|----|----|
| 4 | 0   | 24 | 68 | 89 |
| 5 | -10 | 48 | 56 | 91 |

<sup>a</sup> Reaction conditions: **1a** (0.05 mmol), **2c** (0.1 mmol), (*S*)-**Rh1** (2.5 mol%), AgSbF<sub>6</sub> (20 mol%), Cu(OAc)<sub>2</sub> (0.1 mmol) in DMA (0.25 mL). <sup>b</sup> Isolated yield. <sup>c</sup> The ee values were determined by HPLC analysis on a chiral stationary phase.

**Table S10.** Control experiments<sup>a</sup>

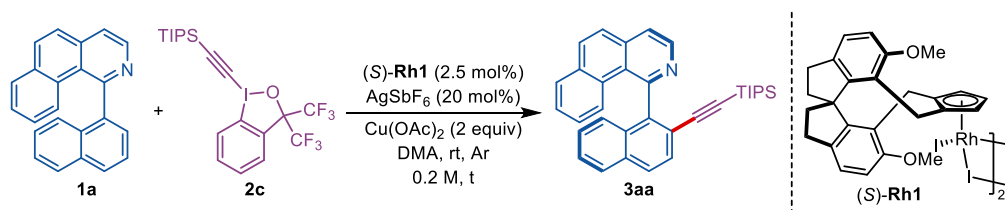

| entry          | variation from the “standard conditions”            | t (h)     | yield (%) <sup>b</sup> | ee (%) <sup>c</sup> |
|----------------|-----------------------------------------------------|-----------|------------------------|---------------------|
| 1              | -                                                   | 24        | 88                     | 84                  |
| 2              | without AgSbF <sub>6</sub>                          | 24        | trace                  | -                   |
| 3              | without Cu(OAc) <sub>2</sub>                        | 24        | 82                     | 87                  |
| <b>4</b>       | without <b>Cu(OAc)<sub>2</sub></b>                  | <b>48</b> | <b>88</b>              | <b>87</b>           |
| 5 <sup>d</sup> | without Cu(OAc) <sub>2</sub>                        | 48        | 52                     | 90                  |
| 6              | without AgSbF <sub>6</sub> and Cu(OAc) <sub>2</sub> | 24        | trace                  | -                   |

<sup>a</sup> Reaction conditions: **1a** (0.05 mmol), **2c** (0.1 mmol), (*S*)-**Rh1** (2.5 mol%), AgSbF<sub>6</sub> (20 mol%), Cu(OAc)<sub>2</sub> (0.1 mmol) in DMA (0.25 mL). <sup>b</sup> Isolated yield. <sup>c</sup> The ee values were determined by HPLC analysis on a chiral stationary phase. <sup>d</sup> Under air.



### 3. General Procedure for Rh-Catalyzed Atroposelective C-H Alkynylation of 1-Aryl Isoquinolines

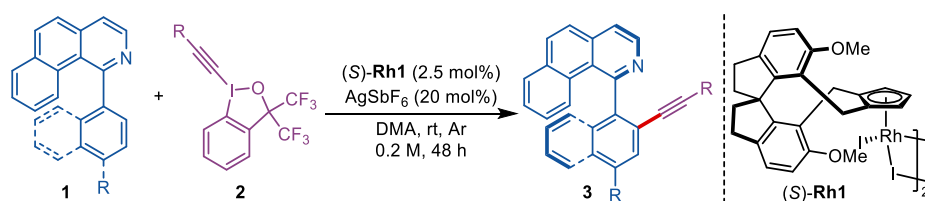

A sealed tube with a magnetic stir bar was charged with (*S*)-**Rh1** (7.2 mg, 0.0025 mmol), AgSbF<sub>6</sub> (13.8 mg, 0.04 mmol), **1** (0.2 mmol), **2** (0.4 mmol), and DMA (1 mL) under argon atmosphere. The resulting mixture was stirred at rt. After the reaction was complete (monitored by TLC), the mixture was cooled to room temperature and quenched with water (5 mL). The aqueous phase was extracted with CH<sub>2</sub>Cl<sub>2</sub> (3×15 mL). Then the combined organic layer was washed with H<sub>2</sub>O and brine. The organic layer was dried over anhydrous Na<sub>2</sub>SO<sub>4</sub>, filtered and concentrated. Then the residue was purified by silica gel column chromatography (petroleum ether/ethyl acetate = 10/1) to afford the desired product **3**.

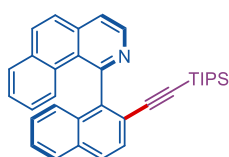

**3aa**, 85.5 mg, 88% yield, yellow oil. <sup>1</sup>H NMR (400 MHz, CDCl<sub>3</sub>) δ 8.83 (d, *J* = 5.2 Hz, 1H), 8.02-7.88 (m, 3H), 7.86-7.74 (m, 3H), 7.68 (d, *J* = 8.4 Hz, 1H), 7.51-7.45 (m, 2H), 7.41 (t, *J* = 7.2 Hz, 1H), 7.34-7.27 (m, 2H), 7.05 (t, *J* = 8.4 Hz, 1H), 0.64-0.54 (m, 21H). <sup>13</sup>C NMR (100 MHz, CDCl<sub>3</sub>) δ 156.7, 144.7, 144.2, 138.3, 133.8, 133.4, 132.4, 131.7, 129.6, 128.9, 128.27, 128.25, 127.4, 127.2, 126.90, 126.86, 126.3, 126.1, 126.0, 125.7, 121.6, 120.0, 105.5, 95.1, 18.31, 18.29, 10.9. IR (ATR): ν<sub>max</sub> (cm<sup>-1</sup>) = 3056, 2943, 2891, 2864, 2148, 1588, 1555, 1507, 1464, 1432, 1384, 1300, 1232, 1210, 1181, 1145, 1114, 1073, 1015, 996, 960, 933, 918, 883, 868, 853, 819, 748, 731, 677, 664, 634; HRMS (ESI): exact mass calculated for: C<sub>34</sub>H<sub>36</sub>NSi [M+H]<sup>+</sup>: 486.2612, found 486.2619. [Phenomenex Lux 5u Cellulose-4 PC-4 column, hexane/*i*-PrOH, 95/5 v/v, flow rate 1 mL/min, λ = 254 nm, 25 °C). t<sub>R</sub> (major) = 6.13 min, t<sub>R</sub> (minor) = 7.64 min, ee = 87%. [α]<sub>D</sub><sup>25</sup> = +237.4 (c = 0.2, CHCl<sub>3</sub>).

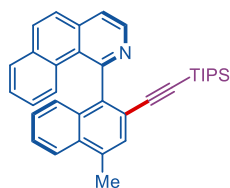

**3ba**, 79.2 mg, 79% yield, yellow oil.  $^1\text{H}$  NMR (400 MHz,  $\text{CDCl}_3$ )  $\delta$  8.83 (d,  $J = 5.2$  Hz, 1H), 8.09 (d,  $J = 8.4$  Hz, 1H), 7.93 (d,  $J = 8.8$  Hz, 1H), 7.82 (d,  $J = 8.0$  Hz, 1H), 7.80-7.74 (m, 2H), 7.59-7.48 (m, 3H), 7.42 (t,  $J = 7.6$  Hz, 1H), 7.36-7.28 (m, 2H), 7.11-7.04 (m, 1H), 2.81 (s, 3H), 0.63-0.55 (m, 21H).  $^{13}\text{C}$  NMR (100 MHz,  $\text{CDCl}_3$ )  $\delta$  157.0, 144.1, 143.2, 138.3, 134.8, 133.4, 133.2, 132.3, 131.8, 129.9, 129.7, 128.9, 127.4, 127.0, 126.8, 126.8, 126.2, 126.1, 125.7, 124.5, 121.5, 119.6, 105.7, 94.6, 19.6, 18.33, 18.30, 10.9. IR (ATR):  $\nu_{\text{max}}$  ( $\text{cm}^{-1}$ ) = 2941, 2889, 2864, 2147, 1704, 1586, 1554, 1509, 1463, 1424, 1403, 1379, 1362, 1302, 1236, 1192, 1164, 1143, 1072, 1035, 1015, 994, 963, 917, 903, 881, 853, 836, 801, 757, 719, 691, 676, 661, 612; HRMS (ESI): exact mass calculated for:  $\text{C}_{35}\text{H}_{38}\text{NSi}$   $[\text{M}+\text{H}]^+$ : 500.2768, found 500.2761. [Chiralpak IC column, hexane/*i*-PrOH, 98/2 v/v, flow rate 1 mL/min,  $\lambda = 254$  nm, 25 °C).  $t_{\text{R}}$  (minor) = 12.01 min,  $t_{\text{R}}$  (major) = 16.80 min,  $ee = 82\%$ .  $[\alpha]_{\text{D}}^{25} = +287.0$  ( $c = 0.2$ ,  $\text{CHCl}_3$ ).

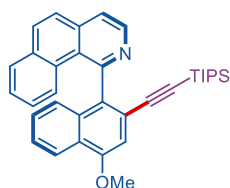

**3ca**, 81.6 mg, 79% yield, yellow oil.  $^1\text{H}$  NMR (400 MHz,  $\text{CDCl}_3$ )  $\delta$  8.83 (d,  $J = 5.2$  Hz, 1H), 8.35 (d,  $J = 8.4$  Hz, 1H), 7.93 (d,  $J = 8.8$  Hz, 1H), 7.81 (d,  $J = 8.0$  Hz, 1H), 7.79-7.73 (m, 2H), 7.60 (d,  $J = 8.8$  Hz, 1H), 7.47 (t,  $J = 7.2$  Hz, 1H), 7.42 (t,  $J = 7.6$  Hz, 1H), 7.30 (t,  $J = 8.0$  Hz, 1H), 7.26-7.23 (m, 1H), 7.13-7.06 (m, 1H), 6.98 (s, 1H), 4.12 (s, 3H), 0.63-0.56 (m, 21H).  $^{13}\text{C}$  NMR (100 MHz,  $\text{CDCl}_3$ )  $\delta$  156.9, 155.2, 144.2, 138.3, 133.4, 132.7, 132.3, 129.8, 128.9, 127.7, 127.4, 126.8, 126.44, 126.40, 126.36, 126.11, 126.09, 125.7, 122.2, 121.5, 119.8, 107.1, 105.9, 94.6, 55.9, 18.33, 18.31, 10.9. IR (ATR):  $\nu_{\text{max}}$  ( $\text{cm}^{-1}$ ) = 2924, 2863, 2145, 1613, 1590, 1556, 1509, 1462, 1423, 1409, 1385, 1363, 1347, 1301, 1248, 1230, 1211, 1183, 1145, 1132, 1112, 1015, 996, 964, 947, 933, 906, 883, 870, 852, 802, 754, 730, 700, 674, 642; HRMS (ESI): exact mass calculated for:  $\text{C}_{35}\text{H}_{38}\text{NOSi}$   $[\text{M}+\text{H}]^+$ : 516.2717, found 516.2709. [Chiralpak IC column, hexane/*i*-PrOH, 95/5 v/v, flow rate 1 mL/min,  $\lambda = 254$  nm, 25 °C).  $t_{\text{R}}$  (minor) = 8.67 min,  $t_{\text{R}}$  (major) = 12.26 min,  $ee = 94\%$ .  $[\alpha]_{\text{D}}^{25} = +374.1$  ( $c = 0.2$ ,  $\text{CHCl}_3$ ).

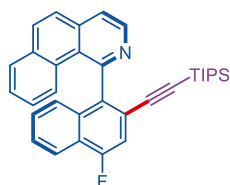

**3da**, 80.2 mg, 80% yield, yellow oil.  $^1\text{H}$  NMR (400 MHz,  $\text{CDCl}_3$ )  $\delta$  8.83 (d,  $J = 5.2$  Hz, 1H), 8.20 (d,  $J = 8.4$  Hz, 1H), 7.94 (d,  $J = 8.8$  Hz, 1H), 7.85-7.72 (m, 3H), 7.55 (t,  $J = 7.2$  Hz, 1H), 7.49 (d,  $J = 8.4$  Hz, 1H), 7.43 (t,  $J = 7.2$  Hz, 1H), 7.40-7.29 (m, 3H), 7.10 (t,  $J = 7.6$  Hz, 1H), 0.66-0.51 (m, 21H).  $^{13}\text{C}$  NMR (100 MHz,  $\text{CDCl}_3$ )  $\delta$  158.3 (d,  $J = 251.5$  Hz), 156.0, 144.2, 141.1 (d,  $J = 4.2$  Hz), 138.3, 133.4, 133.1 (d,  $J = 5.4$  Hz), 132.4, 129.5, 129.0, 128.2, 127.4, 127.3 (d,  $J = 1.8$  Hz), 127.0, 126.4 (d,  $J = 2.9$  Hz), 126.2, 125.9, 125.7, 124.5 (d,  $J = 16.6$  Hz), 121.7, 120.9 (d,  $J = 5.1$  Hz), 120.0 (d,  $J = 10.2$  Hz), 113.0 (d,  $J = 21.3$  Hz), 104.5 (d,  $J = 2.9$  Hz), 96.1, 18.28, 18.26, 10.9.  $^{19}\text{F}$  NMR (376 MHz,  $\text{CDCl}_3$ )  $\delta$  -123.02 (d,  $J = 10.9$  Hz, 1F). IR (ATR):  $\nu_{\text{max}}$  ( $\text{cm}^{-1}$ ) = 2944, 2890, 2865, 2156, 1625, 1601, 1586, 1557, 1509, 1463, 1417, 1383, 1363, 1301, 1272, 1247, 1172, 1146, 1126, 1066, 1039, 1017, 994, 965, 908, 882, 866, 853, 837, 798, 762, 732, 695, 674, 610; HRMS (ESI): exact mass calculated for:  $\text{C}_{34}\text{H}_{35}\text{NFSi}$   $[\text{M}+\text{H}]^+$ : 504.2517, found 504.2513. [Phenomenex Lux 5u Cellulose-4 PC-4 column, hexane/*i*-PrOH, 98/2 v/v, flow rate 1 mL/min,  $\lambda = 254$  nm, 25 °C).  $t_{\text{R}}$  (major) = 6.68 min,  $t_{\text{R}}$  (minor) = 8.11 min,  $ee = 90\%$ .  $[\alpha]_{\text{D}}^{25} = +278.8$  ( $c = 0.2$ ,  $\text{CHCl}_3$ ).

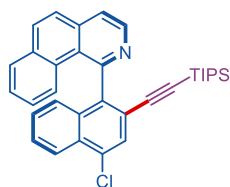

**3ea**, 88.2 mg, 85% yield, yellow oil.  $^1\text{H}$  NMR (400 MHz,  $\text{CDCl}_3$ )  $\delta$  8.82 (d,  $J = 5.2$  Hz, 1H), 8.38 (d,  $J = 8.4$  Hz, 1H), 7.93 (d,  $J = 8.8$  Hz, 1H), 7.84-7.73 (m, 4H), 7.64-7.56 (m, 1H), 7.52 (d,  $J = 8.4$  Hz, 1H), 7.47-7.39 (m, 1H), 7.34 (d,  $J = 3.6$  Hz, 2H), 7.15-7.06 (m, 1H), 0.62-0.54 (m, 21H).  $^{13}\text{C}$  NMR (100 MHz,  $\text{CDCl}_3$ )  $\delta$  155.8, 144.2, 144.0, 138.3, 133.4, 132.8, 132.5, 132.0, 131.3, 129.40, 129.36, 129.0, 128.0, 127.5, 127.0, 126.9, 126.1, 125.9, 125.7, 124.8, 121.8, 120.3, 104.2, 96.3, 18.27, 18.25, 10.9. IR (ATR):  $\nu_{\text{max}}$  ( $\text{cm}^{-1}$ ) = 2942, 2890, 2864, 2153, 1609, 1584, 1555, 1501, 1463, 1423, 1385, 1361, 1323, 1300, 1266, 1239, 1218, 1073, 1016, 994, 967, 937, 908, 881, 852, 836, 801, 780, 759, 734, 697, 675, 650; HRMS (ESI): exact mass calculated for:  $\text{C}_{34}\text{H}_{35}\text{NSiCl}$   $[\text{M}+\text{H}]^+$ : 520.2222, found 520.2213. [Phenomenex Lux 5u Cellulose-4 PC-4 column, hexane/*i*-PrOH, 98/2 v/v, flow rate 1 mL/min,  $\lambda = 254$  nm, 25 °C).  $t_{\text{R}}$

(major) = 7.18 min,  $t_R$  (minor) = 8.30 min,  $ee = 67\%$ .  $[\alpha]_D^{25} = +225.0$  ( $c = 0.2$ ,  $\text{CHCl}_3$ ).

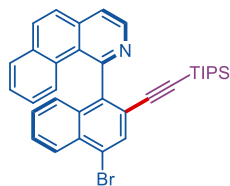

**3fa**, 94.7 mg, 84% yield, yellow oil.  $^1\text{H}$  NMR (400 MHz,  $\text{CDCl}_3$ )  $\delta$  8.83 (d,  $J = 5.2$  Hz, 1H), 8.35 (d,  $J = 8.8$  Hz, 1H), 8.01 (s, 1H), 7.95 (d,  $J = 8.8$  Hz, 1H), 7.87-7.73 (m, 3H), 7.64-7.56 (m, 1H), 7.52 (d,  $J = 8.8$  Hz, 1H), 7.44 (t,  $J = 7.2$  Hz, 1H), 7.38-7.28 (m, 2H), 7.11 (t,  $J = 8.4$  Hz, 1H), 0.67-0.47 (m, 21H).  $^{13}\text{C}$  NMR (100 MHz,  $\text{CDCl}_3$ )  $\delta$  155.7, 144.1, 138.3, 133.3, 133.0, 132.6, 132.5, 132.3, 129.3, 129.0, 128.2, 128.0, 127.5, 127.0, 126.8, 125.9, 125.8, 125.6, 122.7, 121.7, 120.6, 103.9, 96.4, 18.19, 18.17, 10.8. IR (ATR):  $\nu_{\text{max}}$  ( $\text{cm}^{-1}$ ) = 2943, 2923, 2890, 2864, 2153, 1586, 1557, 1499, 1463, 1423, 1385, 1360, 1319, 1299, 1232, 1213, 1183, 1145, 1115, 1072, 1058, 1016, 996, 964, 924, 908, 880, 853, 757, 732, 698, 671, 647; HRMS (ESI): exact mass calculated for:  $\text{C}_{34}\text{H}_{35}\text{NSiBr}$   $[\text{M}+\text{H}]^+$ : 564.1717, found 564.1707. [Chiralpak IC column, hexane/*i*-PrOH, 98/2 v/v, flow rate 1 mL/min,  $\lambda = 254$  nm, 25 °C).  $t_R$  (minor) = 7.50 min,  $t_R$  (major) = 9.18 min,  $ee = 83\%$ .  $[\alpha]_D^{25} = +176.3$  ( $c = 0.2$ ,  $\text{CHCl}_3$ ).

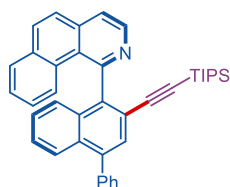

**3ga**, 91.4 mg, 81% yield, yellow oil.  $^1\text{H}$  NMR (400 MHz,  $\text{CDCl}_3$ )  $\delta$  8.86 (d,  $J = 5.2$  Hz, 1H), 8.01-7.93 (m, 2H), 7.87-7.78 (m, 3H), 7.71 (d,  $J = 8.4$  Hz, 1H), 7.67-7.60 (m, 3H), 7.58-7.52 (m, 2H), 7.51-7.36 (m, 4H), 7.33-7.27 (m, 1H), 7.18-7.12 (m, 1H), 0.63-0.53 (m, 21H).  $^{13}\text{C}$  NMR (100 MHz,  $\text{CDCl}_3$ )  $\delta$  156.7, 144.2, 140.7, 140.2, 138.3, 133.4, 132.4, 132.3, 132.1, 130.3, 129.6, 129.0, 128.5, 127.7, 127.5, 127.1, 127.0, 126.9, 126.7, 126.5, 126.2, 126.1, 125.7, 121.7, 119.6, 105.4, 95.1, 18.3, 18.3, 10.9. IR (ATR):  $\nu_{\text{max}}$  ( $\text{cm}^{-1}$ ) = 2942, 2891, 2864, 2152, 1687, 1587, 1555, 1509, 1493, 1463, 1446, 1423, 1405, 1384, 1366, 1346, 1302, 1267, 1237, 1194, 1144, 1100, 1073, 1016, 996, 969, 932, 917, 884, 853, 771, 757, 739, 690, 676, 646, 629; HRMS (ESI): exact mass calculated for:  $\text{C}_{40}\text{H}_{40}\text{NSi}$   $[\text{M}+\text{H}]^+$ : 562.2925, found 562.2930. [Chiralpak IC column, hexane/*i*-PrOH, 95/5 v/v, flow rate 1 mL/min,  $\lambda = 254$  nm, 25 °C).  $t_R$  (minor) = 5.80 min,  $t_R$  (major) = 7.51 min,  $ee = 43\%$ .  $[\alpha]_D^{25} = +127.2$  ( $c = 0.2$ ,  $\text{CHCl}_3$ ).

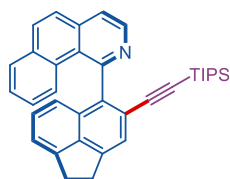

**3ha**, 93.2 mg, 91% yield, yellow oil.  $^1\text{H}$  NMR (400 MHz,  $\text{CDCl}_3$ )  $\delta$  8.83 (d,  $J = 5.2$  Hz, 1H), 7.91 (d,  $J = 8.8$  Hz, 1H), 7.82-7.70 (m, 3H), 7.66 (d,  $J = 8.4$  Hz, 1H), 7.49 (s, 1H), 7.42-7.36 (m, 1H), 7.30-7.25 (m, 2H), 7.11-7.01 (m, 2H), 3.56-3.40 (m, 4H), 0.64-0.55 (m, 21H).  $^{13}\text{C}$  NMR (100 MHz,  $\text{CDCl}_3$ )  $\delta$  179.0, 156.5, 146.1, 145.9, 144.0, 140.5, 139.6, 138.2, 133.3, 132.2, 129.9, 129.8, 129.0, 128.8, 127.3, 126.8, 126.1, 126.1, 125.7, 123.1, 121.5, 121.4, 121.3, 120.6, 106.5, 94.2, 30.7, 30.2, 18.31, 18.29, 10.9. IR (ATR):  $\nu_{\text{max}}$  ( $\text{cm}^{-1}$ ) = 2941, 2890, 2864, 2147, 1722, 1700, 1687, 1610, 1586, 1555, 1509, 1463, 1418, 1384, 1365, 1301, 1269, 1236, 1182, 1143, 1101, 1072, 997, 909, 883, 869, 849, 803, 760, 733, 665; HRMS (ESI): exact mass calculated for:  $\text{C}_{36}\text{H}_{38}\text{NSi}$   $[\text{M}+\text{H}]^+$ : 512.2768, found 512.2773. [Chiralpak IC column, hexane/*i*-PrOH, 95/5 v/v, flow rate 1 mL/min,  $\lambda = 254$  nm, 25 °C).  $t_{\text{R}}$  (minor) = 10.52 min,  $t_{\text{R}}$  (major) = 16.80 min,  $ee = 83\%$ .  $[\alpha]_{\text{D}}^{25} = +247.1$  ( $c = 0.2$ ,  $\text{CHCl}_3$ ).

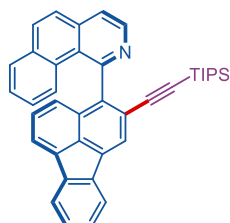

**3ia**, 93.7 mg, 84% yield, yellow oil.  $^1\text{H}$  NMR (400 MHz,  $\text{CDCl}_3$ )  $\delta$  8.84 (d,  $J = 5.2$  Hz, 1H), 8.13 (s, 1H), 8.02-7.96 (m, 1H), 7.96-7.86 (m, 3H), 7.84-7.73 (m, 3H), 7.60 (d,  $J = 8.8$  Hz, 1H), 7.48-7.36 (m, 4H), 7.30 (d,  $J = 8.4$  Hz, 1H), 7.05-6.98 (m, 1H), 0.70-0.48 (m, 21H).  $^{13}\text{C}$  NMR (100 MHz,  $\text{CDCl}_3$ )  $\delta$  155.8, 144.5, 143.8, 140.1, 138.9, 138.1, 137.1, 137.0, 133.4, 132.9, 132.4, 129.6, 129.2, 128.9, 128.7, 128.2, 127.9, 127.3, 126.9, 126.3, 126.2, 125.64, 125.61, 124.3, 122.1, 121.9, 121.8, 121.6, 121.1, 105.9, 95.2, 18.34, 18.32, 10.9. IR (ATR):  $\nu_{\text{max}}$  ( $\text{cm}^{-1}$ ) = 3054, 2942, 2890, 2864, 2146, 1611, 1585, 1554, 1509, 1451, 1408, 1368, 1299, 1237, 1189, 1148, 1110, 1074, 1016, 994, 970, 942, 908, 884, 869, 853, 837, 800, 778, 733, 680, 660, 629; HRMS (ESI): exact mass calculated for:  $\text{C}_{40}\text{H}_{38}\text{NSi}$   $[\text{M}+\text{H}]^+$ : 560.2768, found 560.2761. [Chiralpak IC column, hexane/*i*-PrOH, 95/5 v/v, flow rate 1 mL/min,  $\lambda = 254$  nm, 25 °C).  $t_{\text{R}}$  (minor) = 10.34 min,  $t_{\text{R}}$  (major) = 13.49 min,  $ee = 90\%$ .  $[\alpha]_{\text{D}}^{25} = +284.3$  ( $c = 0.2$ ,  $\text{CHCl}_3$ ).

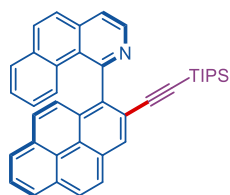

**3ja**, 98.3 mg, 88% yield, yellow oil.  $^1\text{H}$  NMR (400 MHz,  $\text{CDCl}_3$ )  $\delta$  8.89 (d,  $J = 4.8$  Hz, 1H), 8.48 (s, 1H), 8.18 (d,  $J = 7.6$  Hz, 1H), 8.14-8.05 (m, 3H), 8.00-7.90 (m, 2H), 7.87-7.75 (m, 4H), 7.54 (d,  $J = 9.2$  Hz, 1H), 7.36-7.26 (m, 2H), 6.90-6.78 (m, 1H), 0.69-0.57 (m, 21H).  $^{13}\text{C}$  NMR (100 MHz,  $\text{CDCl}_3$ )  $\delta$  157.1, 144.2, 141.3, 138.3, 133.4, 132.4, 131.6, 131.3, 131.0, 129.7, 129.4, 129.2, 128.9, 128.7, 128.4, 127.4, 127.2, 126.8, 126.6, 126.3, 126.0, 125.72, 125.69, 125.6, 125.2, 124.7, 121.7, 120.4, 105.6, 94.7, 18.4, 18.3, 11.0. IR (ATR):  $\nu_{\text{max}}$  ( $\text{cm}^{-1}$ ) = 3046, 2941, 2890, 2863, 2149, 1585, 1555, 1509, 1463, 1415, 1389, 1364, 1303, 1286, 1236, 1181, 1142, 1102, 1072, 1061, 1016, 993, 933, 882, 856, 839, 831, 813, 748, 686, 659, 639; HRMS (ESI): exact mass calculated for:  $\text{C}_{40}\text{H}_{38}\text{NSi}$   $[\text{M}+\text{H}]^+$ : 560.2768, found 560.2764. [Chiralpak IC column, hexane/*i*-PrOH, 80/20 v/v, flow rate 1 mL/min,  $\lambda = 254$  nm, 25 °C).  $t_{\text{R}}$  (major) = 7.29 min,  $t_{\text{R}}$  (minor) = 14.74 min,  $ee = 61\%$ .  $[\alpha]_{\text{D}}^{25} = -54.3$  ( $c = 0.2$ ,  $\text{CHCl}_3$ ).

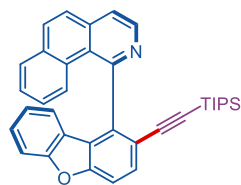

**3ka**, 89.9 mg, 86% yield, yellow oil.  $^1\text{H}$  NMR (400 MHz,  $\text{CDCl}_3$ )  $\delta$  8.86 (d,  $J = 5.6$  Hz, 1H), 7.95 (d,  $J = 8.8$  Hz, 1H), 7.86 (d,  $J = 5.2$  Hz, 1H), 7.84-7.74 (m, 3H), 7.74-7.64 (m, 2H), 7.52 (d,  $J = 8.4$  Hz, 1H), 7.43 (t,  $J = 7.6$  Hz, 1H), 7.29 (t,  $J = 8.4$  Hz, 1H), 7.17-7.06 (m, 1H), 6.87 (t,  $J = 7.6$  Hz, 1H), 6.41 (d,  $J = 7.6$  Hz, 1H), 0.63-0.55 (m, 21H).  $^{13}\text{C}$  NMR (100 MHz,  $\text{CDCl}_3$ )  $\delta$  156.9, 156.5, 155.3, 144.3, 138.4, 133.4, 132.6, 132.5, 129.7, 129.0, 127.5, 127.1, 125.9, 125.6, 125.3, 123.4, 123.0, 122.9, 122.2, 122.1, 117.3, 111.63, 111.59, 104.6, 93.1, 18.29, 18.27, 10.9. IR (ATR):  $\nu_{\text{max}}$  ( $\text{cm}^{-1}$ ) = 2943, 2890, 2864, 2163, 2149, 1588, 1556, 1510, 1471, 1449, 1424, 1384, 1318, 1293, 1262, 1233, 1208, 1182, 1146, 1114, 1066, 1015, 996, 963, 933, 907, 885, 853, 838, 815, 783, 746, 732, 700, 678, 631; HRMS (ESI): exact mass calculated for:  $\text{C}_{36}\text{H}_{36}\text{NOSi}$   $[\text{M}+\text{H}]^+$ : 526.2561, found 526.2551. [Chiralpak IC column, hexane/*i*-PrOH, 95/5 v/v, flow rate 1 mL/min,  $\lambda = 254$  nm, 25 °C).  $t_{\text{R}}$  (major) = 6.93 min,  $t_{\text{R}}$  (minor) = 10.85 min,  $ee = 90\%$ .  $[\alpha]_{\text{D}}^{25} = +193.3$  ( $c = 0.2$ ,  $\text{CHCl}_3$ ).

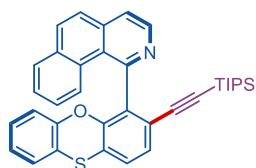

**3la**, 103.4 mg, 93% yield, yellow oil.  $^1\text{H}$  NMR (400 MHz,  $\text{CDCl}_3$ )  $\delta$  8.80 (d,  $J = 5.2$  Hz, 1H), 7.96 (d,  $J = 8.8$  Hz, 1H), 7.92 (d,  $J = 8.8$  Hz, 1H), 7.83 (d,  $J = 8.0$  Hz, 1H), 7.75 (s, 1H), 7.74 (d,  $J = 4.4$  Hz, 1H), 7.48-7.42 (m, 1H), 7.36 (d,  $J = 8.4$  Hz, 1H), 7.29-7.25 (m, 1H), 7.22 (d,  $J = 8.0$  Hz, 1H), 7.02 (dd,  $J = 7.6, 1.6$  Hz, 1H), 6.89-6.83 (m, 1H), 6.80-6.74 (m, 1H), 6.04 (dd,  $J = 8.4, 1.6$  Hz, 1H), 0.65-0.56 (m, 21H).  $^{13}\text{C}$  NMR (100 MHz,  $\text{CDCl}_3$ )  $\delta$  153.5, 151.8, 149.6, 144.0, 138.0, 136.3, 133.3, 132.0, 129.7, 129.3, 128.9, 127.7, 127.5, 127.0, 126.5, 125.64, 125.63, 124.6, 122.9, 122.4, 121.6, 120.0, 118.0, 104.0, 95.3, 18.3, 10.9. IR (ATR):  $\nu_{\text{max}}$  ( $\text{cm}^{-1}$ ) = 2942, 2890, 2863, 2154, 1585, 1555, 1509, 1463, 1447, 1427, 1404, 1377, 1309, 1278, 1267, 1237, 1217, 1125, 1073, 1030, 1005, 952, 908, 883, 869, 852, 815, 784, 749, 732, 673, 642; HRMS (ESI): exact mass calculated for:  $\text{C}_{36}\text{H}_{36}\text{NOSiS}$   $[\text{M}+\text{H}]^+$ : 558.2281, found 558.2282. [Chiralpak IC column, hexane/*i*-PrOH, 95/5 v/v, flow rate 1 mL/min,  $\lambda = 254$  nm, 25 °C).  $t_{\text{R}}$  (major) = 7.25 min,  $t_{\text{R}}$  (minor) = 9.68 min,  $ee = 79\%$ .  $[\alpha]_{\text{D}}^{24} = -93.4$  ( $c = 0.2$ ,  $\text{CHCl}_3$ ).

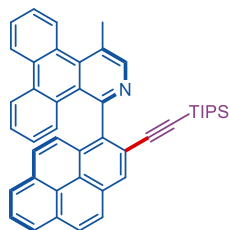

**3ma**, 100.8 mg, 81% yield, yellow oil.  $^1\text{H}$  NMR (400 MHz,  $\text{CDCl}_3$ )  $\delta$  8.79 (s, 1H), 8.69 (d,  $J = 8.0$  Hz, 1H), 8.60 (d,  $J = 7.6$  Hz, 1H), 8.45 (d,  $J = 8.0$  Hz, 1H), 8.36 (s, 1H), 8.20 (d,  $J = 7.2$  Hz, 1H), 8.17-8.09 (m, 2H), 8.08-8.03 (m, 1H), 8.03-7.94 (m, 3H), 7.78-7.70 (m, 1H), 7.70-7.63 (m, 1H), 7.51 (dd,  $J = 8.8, 1.2$  Hz, 1H), 7.36-7.27 (m, 1H), 6.77-6.68 (m, 1H), 3.11 (s, 3H), 0.69-0.56 (m, 18H), 0.50-0.37 (m, 3H).  $^{13}\text{C}$  NMR (100 MHz,  $\text{CDCl}_3$ )  $\delta$  153.5, 148.6, 141.6, 137.8, 132.9, 131.7, 131.3, 131.0, 130.9, 129.9, 129.6, 129.5, 129.3, 128.9, 128.8, 128.7, 128.3, 127.9, 127.40, 127.39, 127.35, 127.2, 126.9, 126.6, 126.2, 125.74, 125.67, 125.6, 125.3, 124.8, 123.7, 123.0, 120.8, 106.0, 94.4, 23.4, 18.34, 18.29, 11.0. IR (ATR):  $\nu_{\text{max}}$  ( $\text{cm}^{-1}$ ) = 2942, 2888, 2864, 2151, 1685, 1596, 1577, 1548, 1528, 1462, 1442, 1418, 1383, 1363, 1292, 1262, 1239, 1178, 1142, 1101, 1073,

1013, 995, 904, 883, 831, 813, 788, 760, 727, 687, 636; HRMS (ESI): exact mass calculated for: C<sub>45</sub>H<sub>42</sub>NSi [M+H]<sup>+</sup>: 624.3081, found 624.3076. [Chiralpak IC column, hexane/*i*-PrOH, 80/20 v/v, flow rate 1 mL/min, λ = 254 nm, 25 °C). t<sub>R</sub> (major) = 7.52 min, t<sub>R</sub> (minor) = 11.75 min, ee = 65%. [α]<sub>D</sub><sup>24</sup> = -46.4 (c = 0.2, CHCl<sub>3</sub>).

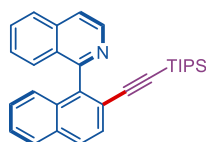

**3na**, 74.4 mg, 85% yield, yellow oil. <sup>1</sup>H NMR (400 MHz, CDCl<sub>3</sub>) δ 8.70 (d, *J* = 5.6 Hz, 1H), 7.91 (t, *J* = 9.2 Hz, 3H), 7.74 (d, *J* = 5.6 Hz, 1H), 7.71-7.62 (m, 2H), 7.54-7.44 (m, 2H), 7.43-7.36 (m, 1H), 7.30 (t, *J* = 8.0 Hz, 1H), 7.16 (d, *J* = 8.4 Hz, 1H), 0.82-0.62 (m, 21H). <sup>13</sup>C NMR (100 MHz, CDCl<sub>3</sub>) δ 159.6, 142.6, 140.3, 136.6, 133.2, 132.5, 130.3, 128.9, 128.52, 128.50, 128.1, 127.5, 127.4, 127.0, 126.9, 126.7, 126.3, 121.4, 120.4, 105.8, 95.6, 18.41, 18.40, 11.0. IR (ATR): ν<sub>max</sub> (cm<sup>-1</sup>) = 3054, 2942, 2891, 2865, 2143, 1622, 1585, 1556, 1500, 1464, 1382, 1369, 1317, 1240, 1222, 1208, 1145, 1074, 1016, 995, 970, 935, 919, 882, 867, 827, 798, 749, 690, 676, 658, 634; HRMS (ESI): exact mass calculated for: C<sub>30</sub>H<sub>34</sub>NSi [M+H]<sup>+</sup>: 436.2455, found 436.2455. [Chiralpak IC column, hexane/*i*-PrOH, 98/2 v/v, flow rate 1 mL/min, λ = 254 nm, 25 °C). t<sub>R</sub> (major) = 9.06 min, t<sub>R</sub> (minor) = 16.60 min, ee = 34%. [α]<sub>D</sub><sup>24</sup> = -90.7 (c = 0.2, CHCl<sub>3</sub>).

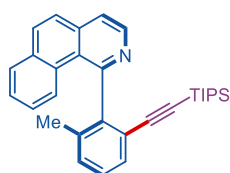

**3oa**, 76.7 mg, 85% yield, yellow oil. <sup>1</sup>H NMR (400 MHz, CDCl<sub>3</sub>) δ 8.75 (d, *J* = 5.2 Hz, 1H), 7.91 (d, *J* = 8.4 Hz, 1H), 7.84 (d, *J* = 9.2 Hz, 1H), 7.72 (d, *J* = 4.4 Hz, 1H), 7.70 (s, 1H), 7.67 (d, *J* = 8.8 Hz, 1H), 7.54-7.47 (m, 2H), 7.39-7.34 (d, *J* = 4.4 Hz, 2H), 7.29-7.25 (m, 1H), 1.99 (s, 3H), 0.61-0.52 (m, 21H). <sup>13</sup>C NMR (100 MHz, CDCl<sub>3</sub>) δ 157.6, 146.0, 143.9, 138.2, 136.0, 133.32, 132.26, 131.1, 131.0, 130.0, 129.0, 128.1, 127.7, 127.5, 126.9, 125.7, 125.6, 125.1, 122.6, 121.4, 105.2, 93.6, 20.0, 18.3, 18.2, 10.9. IR (ATR): ν<sub>max</sub> (cm<sup>-1</sup>) = 2942, 2891, 2864, 2150, 1611, 1588, 1556, 1510, 1461, 1421, 1380, 1235, 1211, 1182, 1145, 1113, 1070, 1016, 996, 963, 934, 909, 882, 852, 801, 786, 749, 731, 700, 676, 639; HRMS (ESI): exact mass calculated for: C<sub>31</sub>H<sub>36</sub>NSi [M+H]<sup>+</sup>: 450.2612, found 450.2605. [Phenomenex Lux 5u Cellulose-4 PC-4 column,



hexane/*i*-PrOH, 98/2 v/v, flow rate 1 mL/min,  $\lambda = 254$  nm, 25 °C).  $t_R$  (minor) = 8.64 min,  $t_R$  (major) = 11.30 min,  $ee = 82\%$ .  $[\alpha]_D^{24} = +191.2$  ( $c = 0.2$ ,  $\text{CHCl}_3$ ).

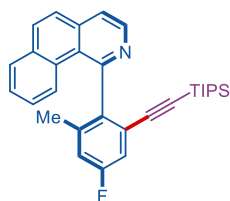

**3pa**, 82.9 mg, 89% yield, yellow oil.  $^1\text{H NMR}$  (400 MHz,  $\text{CDCl}_3$ )  $\delta$  8.78 (d,  $J = 4.8$  Hz, 1H), 7.92 (d,  $J = 8.8$  Hz, 1H), 7.86 (dd,  $J = 8.0, 1.6$  Hz, 1H), 7.73 (d,  $J = 3.2$  Hz, 1H), 7.71 (s, 1H), 7.69 (d,  $J = 8.8$  Hz, 1H), 7.56-7.49 (m, 1H), 7.35-7.28 (m, 1H), 7.22 (dd,  $J = 8.8, 2.4$  Hz, 1H), 7.11 (dd,  $J = 9.6, 2.8$  Hz, 1H), 1.98 (s, 3H), 0.58-0.51 (m, 21H).  $^{13}\text{C NMR}$  (100 MHz,  $\text{CDCl}_3$ )  $\delta$  161.9 (d,  $J = 245.2$  Hz), 156.7, 144.2, 142.6 (d,  $J = 3.4$  Hz), 138.6 (d,  $J = 8.3$  Hz), 138.3, 133.4, 132.3, 129.8, 129.1, 127.6, 127.0, 125.7, 125.31, 125.26, 124.3 (d,  $J = 10.1$  Hz), 121.5, 118.2 (d,  $J = 21.0$  Hz), 117.5 (d,  $J = 22.5$  Hz), 104.0 (d,  $J = 3.3$  Hz), 95.1, 20.2 (d,  $J = 1.8$  Hz), 18.23, 18.20, 10.8.  $^{19}\text{F NMR}$  (376 MHz,  $\text{CDCl}_3$ )  $\delta$  -114.67 (t,  $J = 9.4$  Hz). IR (ATR):  $\nu_{\text{max}}$  ( $\text{cm}^{-1}$ ) = 2943, 2891, 2865, 2155, 1702, 1588, 1556, 1510, 1465, 1410, 1380, 1315, 1237, 1166, 1129, 1102, 1074, 1037, 1016, 989, 970, 919, 882, 854, 802, 750, 695, 675; HRMS (ESI): exact mass calculated for:  $\text{C}_{31}\text{H}_{35}\text{NFSi}$   $[\text{M}+\text{H}]^+$ : 468.2517, found 468.2516. [Phenomenex Lux 5u Cellulose-4 PC-2 column, hexane/*i*-PrOH, 99/1 v/v, flow rate 0.5 mL/min,  $\lambda = 254$  nm, 25 °C).  $t_R$  (minor) = 13.18 min,  $t_R$  (major) = 17.39 min,  $ee = 89\%$ .  $[\alpha]_D^{24} = +241.9$  ( $c = 0.2$ ,  $\text{CHCl}_3$ ).

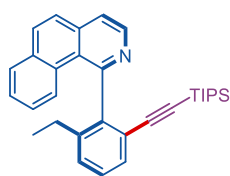

**3qa**, 82.6 mg, 89% yield, yellow oil.  $^1\text{H NMR}$  (400 MHz,  $\text{CDCl}_3$ )  $\delta$  8.78 (d,  $J = 5.2$  Hz, 1H), 7.90 (d,  $J = 8.8$  Hz, 1H), 7.83 (dd,  $J = 8.0, 1.6$  Hz, 1H), 7.74-7.67 (m, 3H), 7.55-7.45 (m, 2H), 7.45-7.40 (m, 2H), 7.28-7.23 (m, 1H), 2.31 (q,  $J = 7.6$  Hz, 2H), 0.95 (t,  $J = 7.2$  Hz, 3H), 0.59-0.50 (m, 21H).  $^{13}\text{C NMR}$  (100 MHz,  $\text{CDCl}_3$ )  $\delta$  157.5, 145.9, 143.9, 141.6, 138.1, 133.3, 132.1, 131.1, 129.9, 129.4, 129.0, 128.2, 127.3, 126.8, 126.0, 125.8, 125.3, 122.6, 121.4, 105.3, 93.6, 26.5, 18.3, 18.2, 14.4, 10.9. IR (ATR):  $\nu_{\text{max}}$  ( $\text{cm}^{-1}$ ) = 2960, 2941, 2891, 2864, 2146, 1609, 1585, 1555, 1510, 1461, 1412, 1380, 1310, 1236, 1103, 1074, 1015, 994, 916, 882, 852, 802, 746, 675, 640; HRMS (ESI): exact mass calculated for:  $\text{C}_{32}\text{H}_{38}\text{NSi}$   $[\text{M}+\text{H}]^+$ : 464.2768, found 464.2772. [Phenomenex Lux 5u

Cellulose-4 PC-4 column, hexane/*i*-PrOH, 98/2 v/v, flow rate 1 mL/min,  $\lambda = 254$  nm, 25 °C).  $t_R$  (minor) = 6.14 min,  $t_R$  (major) = 7.84 min,  $ee = 79\%$ .  $[\alpha]_D^{24} = +208.7$  ( $c = 0.2$ , CHCl<sub>3</sub>).

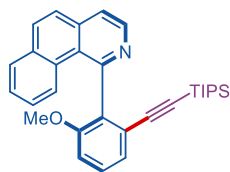

**3ra**, 58.9 mg, 63% yield, yellow oil. <sup>1</sup>H NMR (400 MHz, CDCl<sub>3</sub>)  $\delta$  8.81 (d,  $J = 5.2$  Hz, 1H), 7.90 (d,  $J = 8.8$  Hz, 1H), 7.86-7.77 (m, 2H), 7.73-7.66 (m, 2H), 7.53-7.40 (m, 2H), 7.32-7.27 (m, 2H), 7.10 (d,  $J = 8.4$  Hz, 1H), 3.65 (s, 3H), 0.59-0.50 (m, 21H). <sup>13</sup>C NMR (100 MHz, CDCl<sub>3</sub>)  $\delta$  156.9, 155.2, 143.9, 138.3, 133.3, 132.2, 130.1, 129.5, 129.0, 127.3, 126.8, 125.9, 125.7, 125.7, 123.9, 121.5, 112.4, 104.5, 94.3, 56.2, 18.28, 18.25, 10.9. IR (ATR):  $\nu_{\max}$  (cm<sup>-1</sup>) = 2941, 2891, 2864, 2149, 1588, 1571, 1510, 1463, 1437, 1413, 1381, 1296, 1266, 1240, 1169, 1078, 1015, 994, 931, 916, 882, 852, 794, 748, 674, 658, 638; HRMS (ESI): exact mass calculated for: C<sub>31</sub>H<sub>36</sub>NOSi [M+H]<sup>+</sup>: 466.2561, found 466.2558. [Chiralpak IC column, hexane/*i*-PrOH, 90/10 v/v, flow rate 1 mL/min,  $\lambda = 254$  nm, 25 °C).  $t_R$  (minor) = 6.12 min,  $t_R$  (major) = 11.01 min,  $ee = 71\%$ .  $[\alpha]_D^{24} = +131.2$  ( $c = 0.2$ , CHCl<sub>3</sub>).

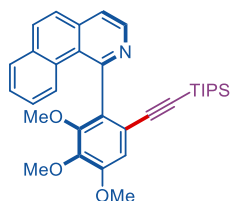

**3sa**, 96.7 mg, 92% yield, yellow oil. <sup>1</sup>H NMR (400 MHz, CDCl<sub>3</sub>)  $\delta$  8.77 (d,  $J = 5.2$  Hz, 1H), 7.89 (dd,  $J = 8.4, 2.0$  Hz, 2H), 7.84 (dd,  $J = 7.6, 1.2$  Hz, 1H), 7.71 (d,  $J = 3.6$  Hz, 1H), 7.69 (s, 1H), 7.53-7.45 (m, 1H), 7.36-7.30 (m, 1H), 6.99 (s, 1H), 3.98 (s, 3H), 3.94 (s, 3H), 3.53 (s, 3H), 0.61-0.52 (m, 21H). <sup>13</sup>C NMR (100 MHz, CDCl<sub>3</sub>)  $\delta$  154.8, 153.5, 150.9, 143.8, 138.1, 135.0, 133.4, 132.0, 130.0, 129.0, 127.2, 126.8, 125.8, 125.68, 125.65, 121.4, 117.9, 112.1, 104.4, 93.4, 61.2, 60.9, 56.4, 18.23, 18.22, 10.9. IR (ATR):  $\nu_{\max}$  (cm<sup>-1</sup>) = 2941, 2892, 2865, 2149, 1587, 1556, 1486, 1459, 1416, 1403, 1374, 1337, 1309, 1262, 1236, 1196, 1134, 1105, 1065, 1047, 1027, 990, 948, 922, 883, 863, 845, 814, 749, 718, 674, 657, 626; HRMS (ESI): exact mass calculated for: C<sub>33</sub>H<sub>40</sub>NO<sub>3</sub>Si [M+H]<sup>+</sup>: 526.2772, found 526.2771. [Chiralpak AD-H column, hexane/*i*-PrOH, 90/10 v/v, flow rate 1 mL/min,  $\lambda = 254$  nm, 25 °C).  $t_R$  (minor) = 3.87 min,  $t_R$  (major) = 5.36

min,  $ee = 61\%$ .  $[\alpha]_D^{24} = +118.5$  ( $c = 0.2$ ,  $\text{CHCl}_3$ ).

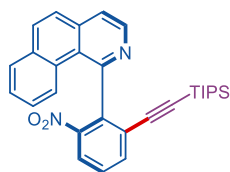

**3ta**, 76.7 mg, 80% yield, yellow oil.  $^1\text{H NMR}$  (400 MHz,  $\text{CDCl}_3$ )  $\delta$  8.65 (d,  $J = 5.6$  Hz, 1H), 8.23 (dd,  $J = 8.0, 1.2$  Hz, 1H), 7.93 (d,  $J = 8.8$  Hz, 1H), 7.89-7.82 (m, 2H), 7.76-7.69 (m, 3H), 7.61 (t,  $J = 8.0$  Hz, 1H), 7.56-7.48 (m, 1H), 7.33-7.26 (m, 1H), 0.59-0.48 (m, 21H).  $^{13}\text{C NMR}$  (100 MHz,  $\text{CDCl}_3$ )  $\delta$  153.9, 148.5, 143.7, 141.7, 138.1, 138.0, 133.5, 132.3, 129.4, 129.3, 128.8, 127.4, 127.1, 125.7, 125.6, 125.3, 125.1, 125.0, 121.9, 102.3, 97.7, 18.21, 18.18, 10.8. IR (ATR):  $\nu_{\text{max}}$  ( $\text{cm}^{-1}$ ) = 2943, 2891, 2864, 2155, 1607, 1587, 1532, 1463, 1383, 1360, 1313, 1278, 1241, 1185, 1101, 1065, 1016, 995, 911, 883, 868, 852, 837, 821, 792, 750, 672, 638; HRMS (ESI): exact mass calculated for:  $\text{C}_{30}\text{H}_{33}\text{N}_2\text{O}_2\text{Si}$   $[\text{M}+\text{H}]^+$ : 481.2306, found 481.2302. [Chiralcel OD-H column, hexane/*i*-PrOH, 90/10 v/v, flow rate 1 mL/min,  $\lambda = 254$  nm, 25 °C).  $t_R$  (minor) = 3.20 min,  $t_R$  (major) = 4.96 min,  $ee = 95\%$ .  $[\alpha]_D^{24} = +591.8$  ( $c = 0.2$ ,  $\text{CHCl}_3$ ).

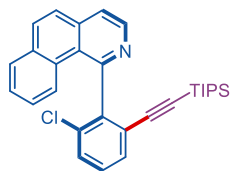

**3ua**, 84.7 mg, 90% yield, yellow oil.  $^1\text{H NMR}$  (400 MHz,  $\text{CDCl}_3$ )  $\delta$  8.80 (d,  $J = 5.2$  Hz, 1H), 7.91 (d,  $J = 8.4$  Hz, 1H), 7.85 (dd,  $J = 7.6, 1.2$  Hz, 1H), 7.75-7.68 (m, 3H), 7.61-7.56 (m, 2H), 7.54-7.49 (m, 1H), 7.41 (t,  $J = 7.6$  Hz, 1H), 7.34-7.29 (m, 1H), 0.60-0.55 (m, 21H).  $^{13}\text{C NMR}$  (100 MHz,  $\text{CDCl}_3$ )  $\delta$  155.2, 145.3, 144.1, 138.2, 133.3, 133.2, 132.2, 131.8, 130.3, 129.6, 129.2, 129.1, 127.6, 127.0, 125.7, 125.3, 125.1, 124.8, 121.9, 103.7, 95.8, 18.23, 18.20, 10.8. IR (ATR):  $\nu_{\text{max}}$  ( $\text{cm}^{-1}$ ) = 2942, 2891, 2864, 2164, 1610, 1586, 1555, 1511, 1463, 1443, 1410, 1380, 1310, 1265, 1239, 1181, 1144, 1105, 1072, 1015, 994, 896, 869, 852, 790, 749, 735, 715, 674, 637; HRMS (ESI): exact mass calculated for:  $\text{C}_{30}\text{H}_{33}\text{NSiCl}$   $[\text{M}+\text{H}]^+$ : 470.2065, found 470.2061. [Chiralpak IC column, hexane/*i*-PrOH, 95/5 v/v, flow rate 1 mL/min,  $\lambda = 254$  nm, 25 °C).  $t_R$  (minor) = 7.47 min,  $t_R$  (major) = 15.39 min,  $ee = 78\%$ .  $[\alpha]_D^{24} = +188.9$  ( $c = 0.2$ ,  $\text{CHCl}_3$ ).

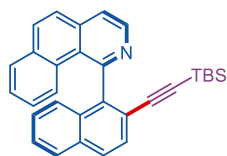

**3ae**, 21.3 mg, 24% yield, yellow oil.  $^1\text{H NMR}$  (400 MHz,  $\text{CDCl}_3$ )  $\delta$  8.85 (d,  $J = 5.2$  Hz, 1H), 7.94 (t,  $J = 8.4$  Hz, 3H), 7.85-7.75 (m, 3H), 7.66 (d,  $J = 8.4$  Hz, 1H), 7.53-7.39 (m, 3H), 7.37-7.27 (m, 2H), 7.09-7.02 (m, 1H), 0.39 (s, 9H), -0.36 (s, 3H), -0.40 (s, 3H).  $^{13}\text{C NMR}$  (100 MHz,  $\text{CDCl}_3$ )  $\delta$  156.7, 145.0, 144.2, 138.2, 133.9, 133.3, 132.4, 131.6, 129.6, 129.2, 128.9, 128.32, 128.28, 127.4, 127.3, 127.0, 126.9, 126.3, 126.2, 126.1, 125.7, 121.5, 119.8, 104.3, 97.0, 25.7, 16.1, -5.02, -5.06. IR (ATR):  $\nu_{\text{max}}$  ( $\text{cm}^{-1}$ ) = 2953, 2926, 2887, 2854, 2149, 1586, 1555, 1506, 1466, 1430, 1393, 1362, 1335, 1301, 1249, 1222, 1007, 992, 956, 916, 868, 852, 824, 776, 747, 690, 677, 660, 647, 630; HRMS (ESI): exact mass calculated for:  $\text{C}_{31}\text{H}_{30}\text{NSi}$   $[\text{M}+\text{H}]^+$ : 444.2142, found 444.2141. [Chiralpak IC column, hexane/*i*-PrOH, 95/5 v/v, flow rate 1 mL/min,  $\lambda = 254$  nm, 25 °C).  $t_{\text{R}}$  (major) = 8.65 min,  $t_{\text{R}}$  (minor) = 12.19 min,  $ee = 76\%$ .  $[\alpha]_{\text{D}}^{24} = +280.8$  ( $c = 0.2$ ,  $\text{CHCl}_3$ ).

## 4. Synthetic Transformations

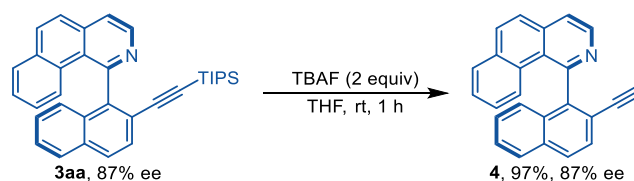

A sealed tube with a magnetic stir bar was charged with **3aa** (485.3 mg, 1 mmol), TBAF (2 mL, 2 mmol, 1M) and THF (5 mL) under argon atmosphere. The resulting mixture was stirred at room temperature. After the reaction was complete (monitored by TLC), the mixture was quenched with water (5 mL). The aqueous phase was extracted with  $\text{CH}_2\text{Cl}_2$  (3 $\times$ 15 mL). After the combined organic layer was washed with  $\text{H}_2\text{O}$  and brine, it was dried over anhydrous  $\text{Na}_2\text{SO}_4$ , filtered and concentrated. Then the residue was purified by silica gel column chromatography (petroleum ether/ethyl acetate = 10/1) to afford terminal alkyne **4**.

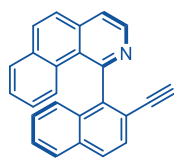

**4**, 318.2 mg, 97% yield, white solid, m.p. = 167.6-169.7 °C.  $^1\text{H}$  NMR (400 MHz,  $\text{CDCl}_3$ )  $\delta$  8.87 (d,  $J$  = 5.2 Hz, 1H), 8.00-7.88 (m, 3H), 7.87-7.76 (m, 3H), 7.71 (d,  $J$  = 8.4 Hz, 1H), 7.50-7.37 (m, 3H), 7.29-7.21 (m, 2H), 7.08-6.98 (m, 1H), 2.61 (s, 1H).  $^{13}\text{C}$  NMR (100 MHz,  $\text{CDCl}_3$ )  $\delta$  156.2, 145.3, 144.3, 138.0, 133.9, 133.2, 132.4, 131.4, 129.5, 129.4, 129.0, 128.5, 128.3, 127.4, 127.3, 127.2, 127.0, 126.1, 126.0, 125.8, 121.6, 118.7, 82.4, 81.1. IR (ATR):  $\nu_{\text{max}}$  ( $\text{cm}^{-1}$ ) = 3292, 3054, 1608, 1585, 1555, 1506, 1428, 1395, 1363, 1333, 1301, 1238, 1197, 1144, 1102, 1026, 993, 908, 869, 854, 820, 748, 730, 693, 647, 622; HRMS (ESI): exact mass calculated for:  $\text{C}_{25}\text{H}_{16}\text{N}$   $[\text{M}+\text{H}]^+$ : 330.1277, found 330.1285. [Chiralpak IC column, hexane/*i*-PrOH, 80/20 v/v, flow rate 1 mL/min,  $\lambda$  = 254 nm, 25 °C).  $t_{\text{R}}$  (major) = 10.21 min,  $t_{\text{R}}$  (minor) = 20.16 min,  $ee$  = 87%.  $[\alpha]_{\text{D}}^{24}$  = +116.3 ( $c$  = 0.2,  $\text{CHCl}_3$ ).

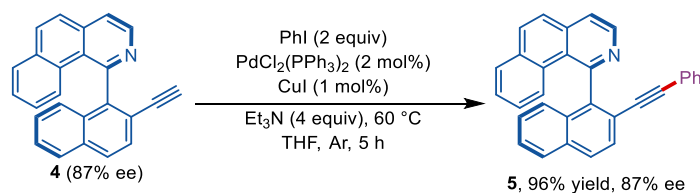

A sealed tube with a magnetic stir bar was charged with **4** (65.8 mg, 0.2 mmol),  $\text{CuI}$

(0.4 mg, 1 mol%), Pd(PPh<sub>3</sub>)<sub>2</sub>Cl<sub>2</sub> (2.8 mg, 2 mol%), THF (2 mL), PhI (81.6 mg, 0.4 mmol) and Et<sub>3</sub>N (81.0 mg, 0.8 mmol) under argon atmosphere. The resulting mixture was stirred at 60 °C. After the reaction was complete (monitored by TLC), the mixture was cooled to room temperature and quenched with water (5 mL). The aqueous phase was extracted with CH<sub>2</sub>Cl<sub>2</sub> (3×15 mL). After the combined organic layer was washed with H<sub>2</sub>O and brine, it was dried over anhydrous Na<sub>2</sub>SO<sub>4</sub>, filtered and concentrated. Then the residue was purified by silica gel column chromatography (petroleum ether/ethyl acetate = 10/1) to afford the desired product **5**.

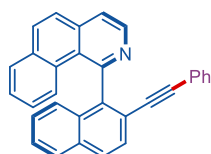

**5**, 77.8 mg, 96% yield, white solid. <sup>1</sup>H NMR (400 MHz, CDCl<sub>3</sub>) δ 8.88 (d, *J* = 5.2 Hz, 1H), 8.04-7.91 (m, 3H), 7.88-7.77 (m, 3H), 7.71 (d, *J* = 8.8 Hz, 1H), 7.54 (d, *J* = 8.4 Hz, 1H), 7.51-7.43 (m, 2H), 7.42-7.36 (m, 1H), 7.35-7.28 (m, 1H), 7.12-6.96 (m, 4H), 6.71-6.59 (m, 2H). <sup>13</sup>C NMR (100 MHz, CDCl<sub>3</sub>) δ 156.7, 144.4, 144.2, 138.0, 133.8, 133.2, 132.4, 131.6, 131.3, 129.6, 128.9, 128.8, 128.5, 128.3, 127.9, 127.4, 126.97, 126.96, 126.24, 126.19, 126.1, 125.7, 123.0, 121.4, 119.9, 93.6, 88.7. [Chiralpak IC column, hexane/*i*-PrOH, 80/20 v/v, flow rate 1 mL/min, λ = 254 nm, 25 °C). *t*<sub>R</sub> (major) = 8.01 min, *t*<sub>R</sub> (minor) = 10.97 min, *ee* = 87%. [α]<sub>D</sub><sup>24</sup> = +467.8 (c = 0.2, CHCl<sub>3</sub>).

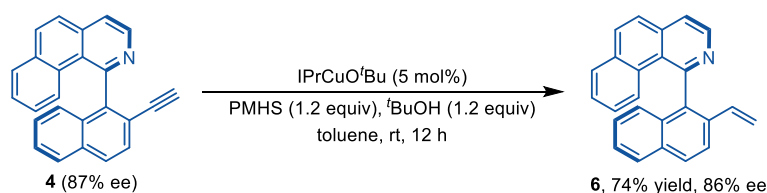

A sealed tube with a magnetic stir bar was charged with IPrCuCl (4.9 mg, 5 mol%), <sup>t</sup>BuONa (2.8 mg, 2 mol%) and THF (0.5 mL) under argon atmosphere. The resulting reaction mixture was stirred for 1 hour at room temperature, and then the solvent was removed under vacuum and anhydrous toluene (2 mL) was added and the solution was transferred via cannula to a dried sealed tube containing **4** (65.8 mg, 0.2 mmol). PMHS (53.4 mg, 0.24 mmol) and <sup>t</sup>BuOH (17.8 mg, 0.24 mmol) were added and the reaction mixture was stirred overnight at rt under argon atmosphere. After the reaction was complete (monitored by TLC), the mixture was quenched with water (5 mL). The aqueous phase was extracted with CH<sub>2</sub>Cl<sub>2</sub> (3×15 mL). After the combined organic layer was washed with H<sub>2</sub>O and brine, it was dried over anhydrous Na<sub>2</sub>SO<sub>4</sub>, filtered and

concentrated. Then the residue was purified by silica gel column chromatography (petroleum ether/ethyl acetate = 10/1) to afford the alkene product **6**.

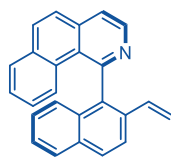

**6**, 49.0 mg, 74% yield, white solid, m.p. = 149.7-151.7 °C. <sup>1</sup>H NMR (400 MHz, CDCl<sub>3</sub>) δ 8.88 (d, *J* = 5.2 Hz, 1H), 8.04-7.95 (m, 2H), 7.94-7.87 (m, 2H), 7.86-7.78 (m, 3H), 7.50 (d, *J* = 8.8 Hz, 1H), 7.43-7.36 (m, 2H), 7.20-7.14 (m, 1H), 7.09-6.99 (m, 2H), 6.26 (dd, *J* = 17.2, 10.8 Hz, 1H), 5.72 (d, *J* = 17.2 Hz, 1H), 5.00 (d, *J* = 10.8 Hz, 1H). <sup>13</sup>C NMR (100 MHz, CDCl<sub>3</sub>) δ 156.8, 144.4, 139.3, 138.0, 134.4, 133.8, 133.3, 132.63, 132.60, 132.0, 129.4, 129.0, 128.8, 128.1, 127.6, 127.0, 126.9, 126.31, 126.25, 126.2, 126.1, 125.8, 123.3, 121.5, 115.9. IR (ATR):  $\nu_{\text{max}}$  (cm<sup>-1</sup>) = 3047, 2972, 2926, 2855, 2161, 1586, 1555, 1509, 1466, 1420, 1391, 1364, 1300, 1267, 1237, 1202, 1101, 1056, 1028, 992, 909, 870, 851, 832, 819, 798, 753, 719, 666, 629; HRMS (ESI): exact mass calculated for: C<sub>25</sub>H<sub>18</sub>N [M+H]<sup>+</sup>: 332.1434, found 332.1436. [Chiralpak IC column, hexane/*i*-PrOH, 80/20 v/v, flow rate 1 mL/min,  $\lambda$  = 254 nm, 25 °C). *t*<sub>R</sub> (major) = 7.93 min, *t*<sub>R</sub> (minor) = 14.20 min, *ee* = 86%. [ $\alpha$ ]<sub>D</sub><sup>24</sup> = +95.8 (c = 0.2, CHCl<sub>3</sub>).

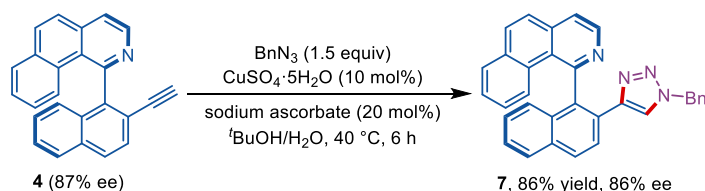

A sealed tube with a magnetic stir bar was charged with **4** (65.8 mg, 0.2 mmol), BnN<sub>3</sub> (40 mg, 0.3 mmol), <sup>t</sup>BuOH (6 mL) and water (0.48 mL), a solution of CuSO<sub>4</sub>·5H<sub>2</sub>O (0.1 M in water, 5 mg, 0.02 mmol) and (L)-sodium ascorbate (0.1 M in water, 7.9 mg, 0.04 mmol) were then sequentially added under argon atmosphere. The resulting mixture was stirred at 40 °C. After the reaction was complete (monitored by TLC), the mixture was cooled to room temperature and quenched with water (5 mL). The aqueous phase was extracted with CH<sub>2</sub>Cl<sub>2</sub> (3×15 mL). After the combined organic layer was washed with H<sub>2</sub>O and brine, it was dried over anhydrous Na<sub>2</sub>SO<sub>4</sub>, filtered and concentrated. Then the residue was purified by silica gel column chromatography (DCM/EtOAc = 2/1) to afford triazole **7**.

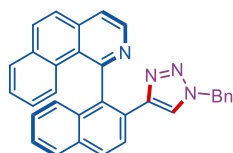

**7**, 79.2 mg, 86% yield, yellow solid, m.p. = 174.3-176.5 °C. <sup>1</sup>H NMR (400 MHz, CDCl<sub>3</sub>) δ 8.71 (d, *J* = 5.2 Hz, 1H), 8.49 (d, *J* = 8.4 Hz, 1H), 8.13 (d, *J* = 8.8 Hz, 1H), 7.95 (d, *J* = 8.0 Hz, 1H), 7.85 (d, *J* = 8.8 Hz, 1H), 7.76-7.67 (m, 2H), 7.64 (d, *J* = 8.8 Hz, 1H), 7.47-7.37 (m, 2H), 7.36-7.26 (m, 2H), 7.23-7.12 (m, 4H), 7.01-6.92 (m, 1H), 6.76-6.67 (m, 2H), 5.70 (s, 1H), 5.06 (s, 2H). <sup>13</sup>C NMR (100 MHz, CDCl<sub>3</sub>) δ 157.0, 146.1, 144.1, 138.1, 137.9, 134.0, 133.8, 133.0, 132.7, 131.8, 129.0, 128.91, 128.87, 128.8, 128.4, 128.2, 127.9, 127.8, 127.2, 126.9, 126.6, 126.5, 126.4, 126.01, 125.96, 125.8, 125.4, 121.9, 121.7, 53.6. IR (ATR): ν<sub>max</sub> (cm<sup>-1</sup>) = 2956, 2927, 2855, 1585, 1555, 1505, 1474, 1457, 1423, 1396, 1354, 1309, 1255, 1234, 1223, 1202, 1144, 1088, 1051, 1027, 993, 949, 921, 868, 846, 804, 752, 727, 698, 669, 638; HRMS (ESI): exact mass calculated for: C<sub>32</sub>H<sub>23</sub>N<sub>4</sub> [M+H]<sup>+</sup>: 463.1917, found 463.1921. [Chiralpak AD-H column, hexane/*i*-PrOH, 60/40 v/v, flow rate 1 mL/min, λ = 254 nm, 25 °C). t<sub>R</sub> (minor) = 6.16 min, t<sub>R</sub> (major) = 7.47 min, ee = 86%. [α]<sub>D</sub><sup>24</sup> = +95.8 (c = 0.2, CHCl<sub>3</sub>).

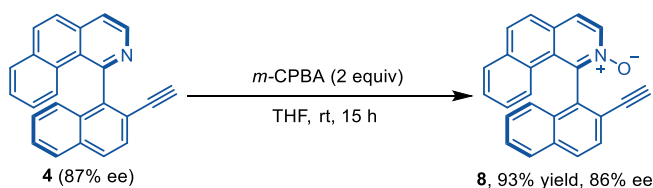

A sealed tube with a magnetic stir bar was charged with **4** (65.8 mg, 0.2 mmol), *m*-CPBA (92 mg, 0.4 mmol) and THF (2 mL) under argon atmosphere. The resulting mixture was stirred at rt. After the reaction was complete (monitored by TLC), the mixture was quenched with water (5 mL). The aqueous phase was extracted with CH<sub>2</sub>Cl<sub>2</sub> (3×15 mL). After the combined organic layer was washed with H<sub>2</sub>O and brine, it was dried over anhydrous Na<sub>2</sub>SO<sub>4</sub>, filtered and concentrated. Then the residue was purified by silica gel column chromatography (DCM/MeOH = 30/1) to afford N-oxide **8**.

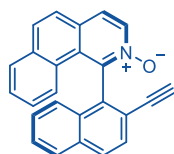

**8**, 64.2 mg, 93% yield, white solid, m.p. = 99.2-101.3 °C. <sup>1</sup>H NMR (400 MHz, CDCl<sub>3</sub>)



$\delta$  8.56 (d,  $J = 6.8$  Hz, 1H), 8.04 (d,  $J = 8.8$  Hz, 1H), 7.95 (d,  $J = 8.4$  Hz, 1H), 7.87-7.78 (m, 3H), 7.75 (d,  $J = 8.4$  Hz, 1H), 7.71 (d,  $J = 8.8$  Hz, 1H), 7.53-7.47 (m, 1H), 7.44-7.38 (m, 1H), 7.36-7.28 (m, 2H), 7.11 (d,  $J = 8.4$  Hz, 1H), 6.96 (m, 1H), 2.71 (s, 1H).  $^{13}\text{C}$  NMR (100 MHz,  $\text{CDCl}_3$ )  $\delta$  145.0, 137.6, 137.3, 134.0, 133.8, 130.9, 130.7, 129.8, 129.6, 129.5, 129.2, 128.8, 128.2, 128.0, 127.82, 127.76, 127.6, 127.4, 126.0, 125.0, 124.57, 124.55, 119.9, 81.5, 81.2. IR (ATR):  $\nu_{\text{max}}$  ( $\text{cm}^{-1}$ ) = 3294, 3060, 2923, 1701, 1573, 1502, 1432, 1394, 1289, 1249, 1210, 1178, 1147, 1121, 1086, 1074, 916, 868, 842, 822, 804, 749, 731, 710, 674, 647, 625; HRMS (ESI): exact mass calculated for:  $\text{C}_{25}\text{H}_{16}\text{NO}$   $[\text{M}+\text{H}]^+$ : 346.1226, found 346.1220. [Chiralpak AD-H column, hexane/*i*-PrOH, 60/40 v/v, flow rate 1 mL/min,  $\lambda = 254$  nm, 25 °C).  $t_{\text{R}}$  (minor) = 5.90 min,  $t_{\text{R}}$  (major) = 6.94 min,  $ee = 86\%$ .  $[\alpha]_{\text{D}}^{24} = +69.4$  ( $c = 0.2$ ,  $\text{CHCl}_3$ ).

## 5. Mechanistic Studies

### 5.1 Deuterium labelling study with D<sub>2</sub>O

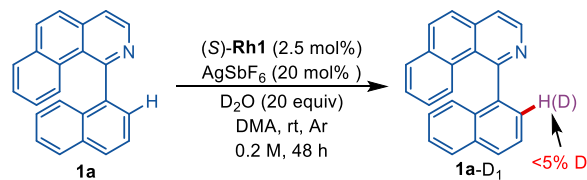

A sealed tube with a magnetic stir bar was charged with *(S)*-Rh1 (1.8 mg, 2.5 mol%), AgSbF<sub>6</sub> (3.4 mg, 20 mol%), **1a** (15.3 mg, 0.05 mmol), D<sub>2</sub>O (20 mg, 1.0 mmol) and DMA (0.25 mL) under argon atmosphere. The resulting mixture was stirred at rt for 48 h. Afterwards, the mixture was cooled to room temperature and diluted with DCM (10 mL), filtered through a thin pad of silica gel. The filter cake was washed with DCM and the combined filtrate was concentrated. The residue was then purified by short column chromatography on silica gel (petroleum ether/EtOAc, 10/1, v/v) to give the recovered **1a**. H/D exchange was not observed by <sup>1</sup>H NMR analysis.

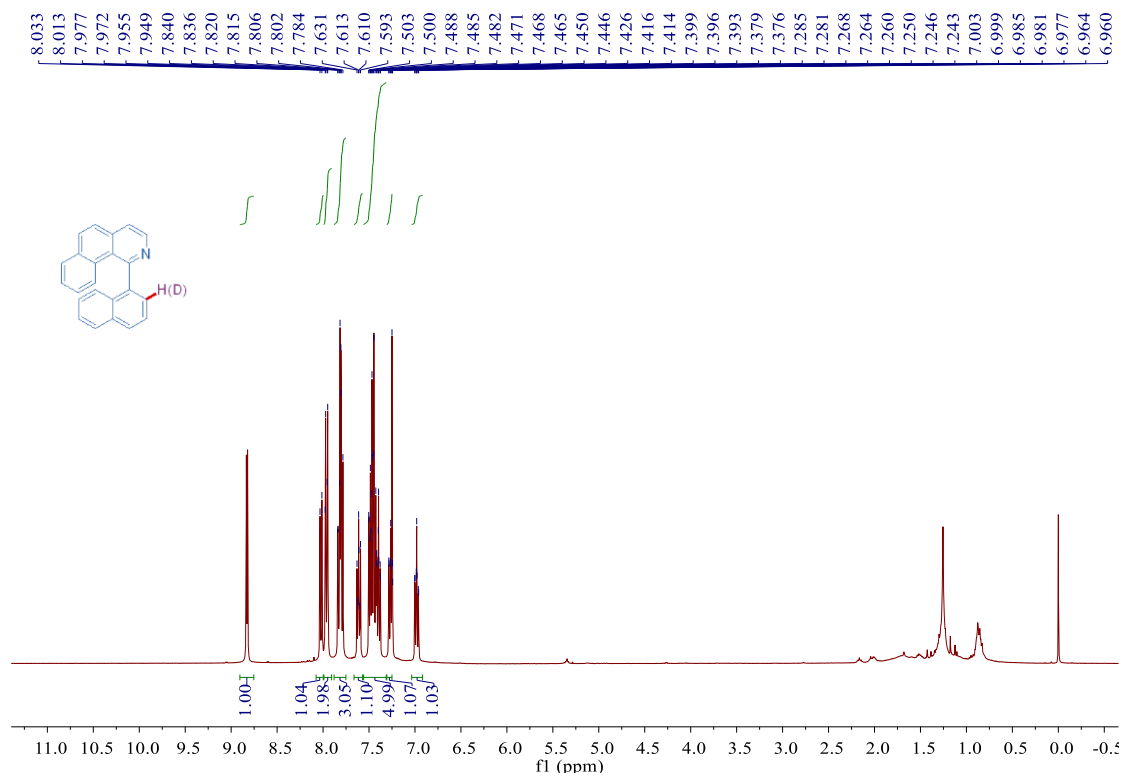

## 5.2 Intermolecular kinetic isotope effect of 1-(naphthalen-1-yl)benzo[h]isoquinoline

A sealed tube with a magnetic stir bar was charged with (*S*)-**Rh1** (1.8 mg, 0.0025 mmol), AgSbF<sub>6</sub> (3.4 mg, 0.01 mmol), **1a** (15.3 mg, 0.05 mmol) or **1a-D**<sub>1</sub> (15.6 mg, 0.05 mmol), **2c** (55 mg, 0.1 mmol) and DMA (0.25 mL) under argon atmosphere. The resulting mixture was stirred at 0 °C for specific time. The reaction mixture was transferred to a short pad of silica gel and washed with ethyl acetate. The solvent was evaporated, and analyzed by <sup>1</sup>H NMR using dibromomethane as an internal standard (the yields of **3aa** were shown in **Table S11** and **Table S12**). The initial reaction rate was obtained by plotting the five points to obtain KIE value ( $k_H/k_D$ ) to be 4.05 (shown in **Figure S1** and **Figure S2**).

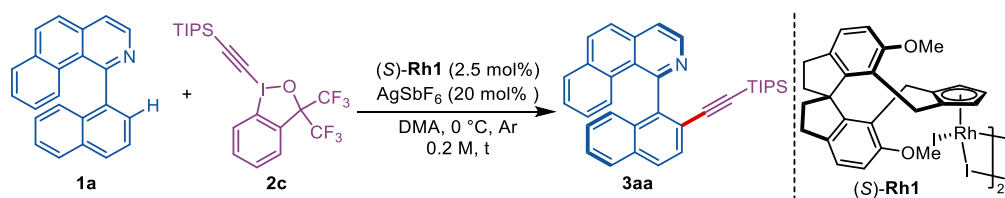

**Table S11.** Yield of **3aa** at specific time

| Time (min) | 0 | 30  | 60  | 90   | 120  |
|------------|---|-----|-----|------|------|
| Yield (%)  | 0 | 5.1 | 9.9 | 15.3 | 19.8 |

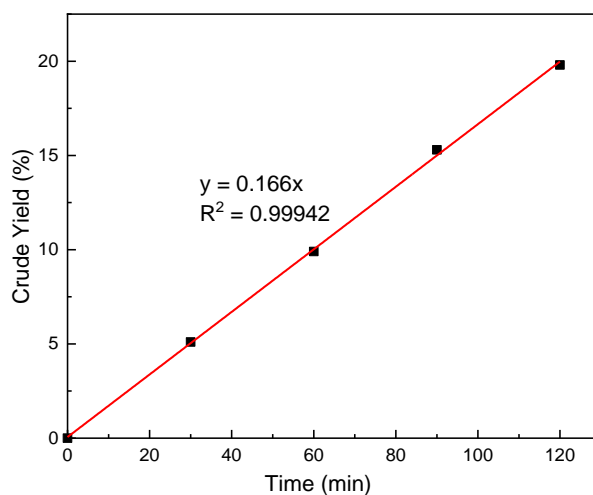

**Figure S1.** Initial rate of the reaction of **2a** with **2c**

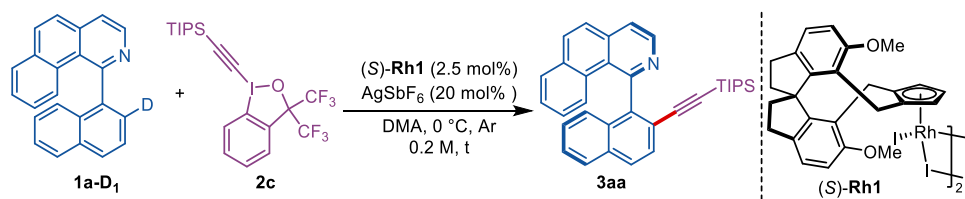

**Table S12.** Yield of **3aa** at specific time

| Time (min) | 0 | 120 | 300  | 420  | 600  |
|------------|---|-----|------|------|------|
| Yield (%)  | 0 | 4.0 | 12.9 | 17.8 | 23.8 |

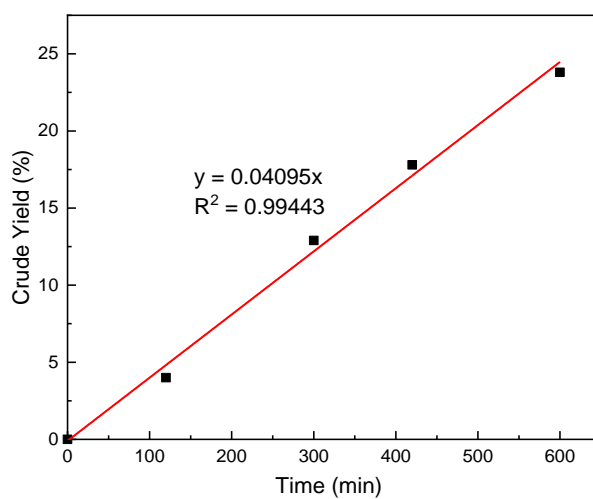

**Figure S2.** Initial rate of the reaction of **1a-D<sub>1</sub>** with **2c**

### 5.3 Plausible Catalytic Cycle

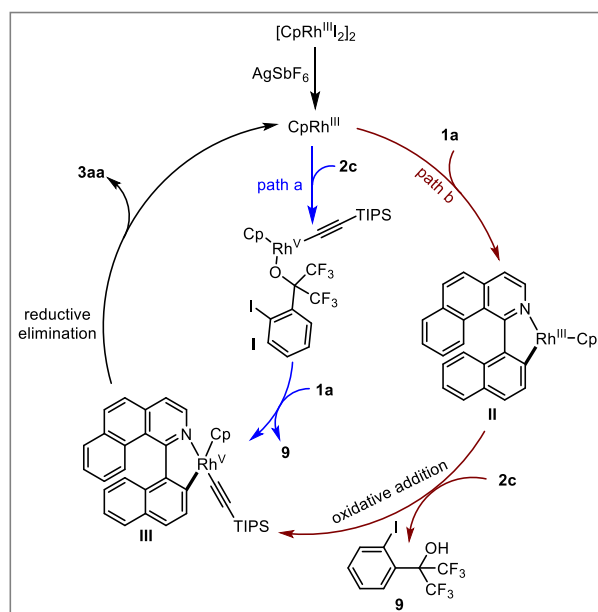

**Figure S3** Plausible Catalytic Cycle

## 6. Copies of NMR Spectra

$^1\text{H}$  NMR (400 MHz,  $\text{CDCl}_3$ ) of **3aa**

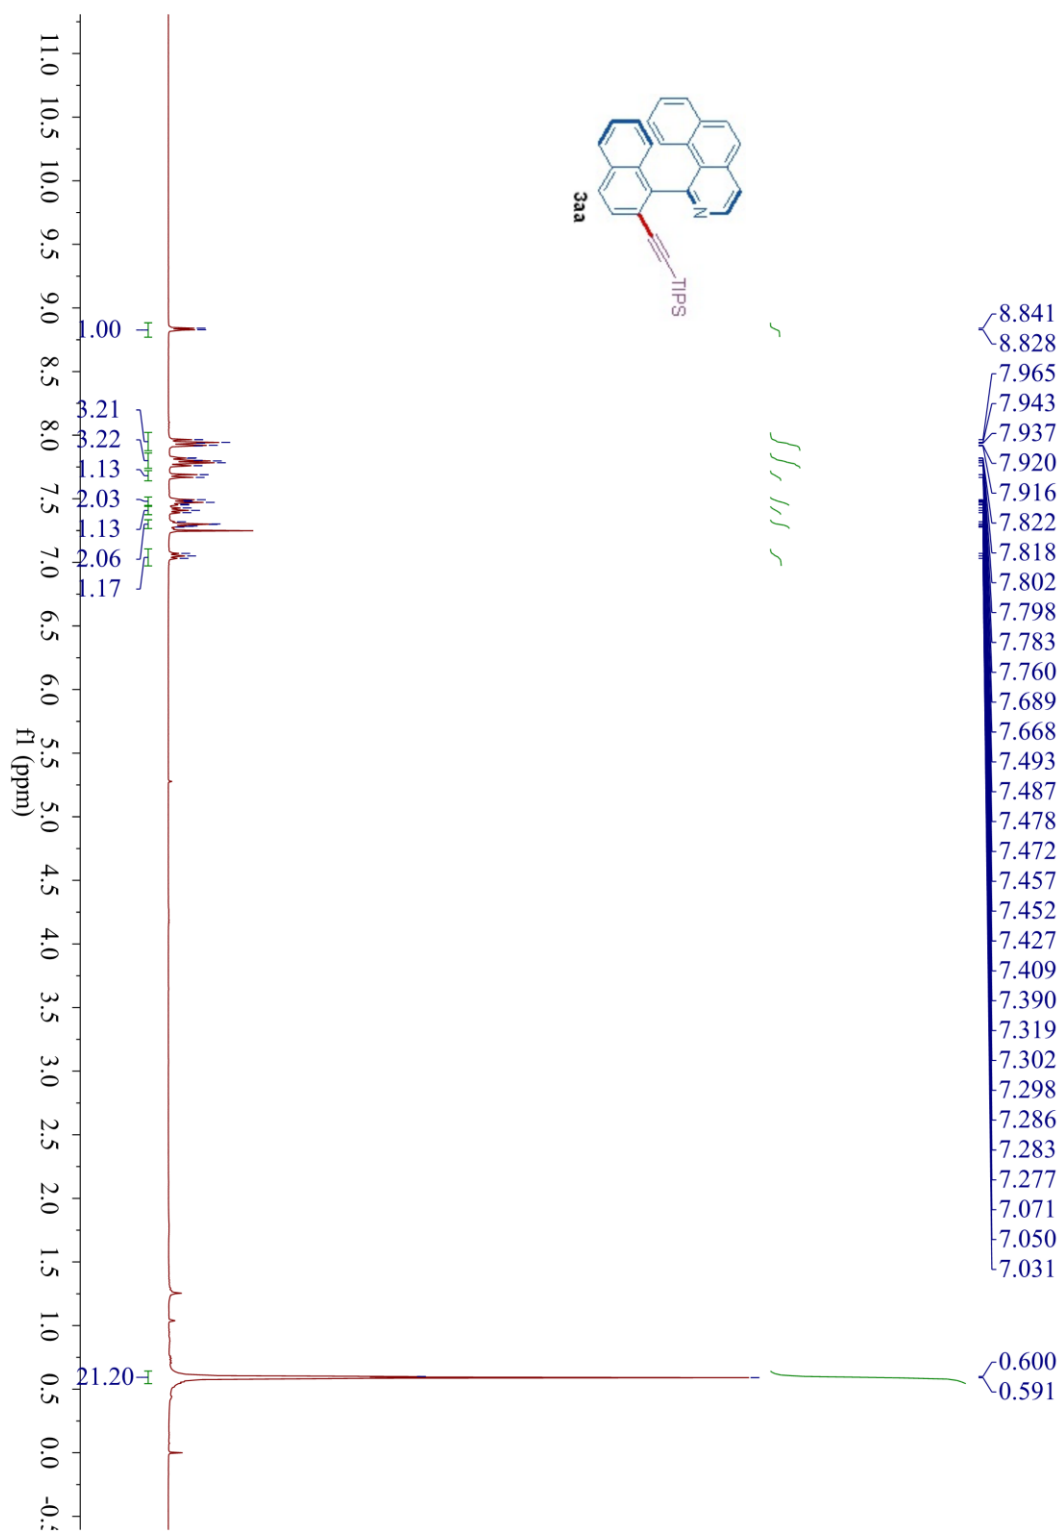

$^{13}\text{C}$  NMR (100 MHz,  $\text{CDCl}_3$ ) of **3aa**

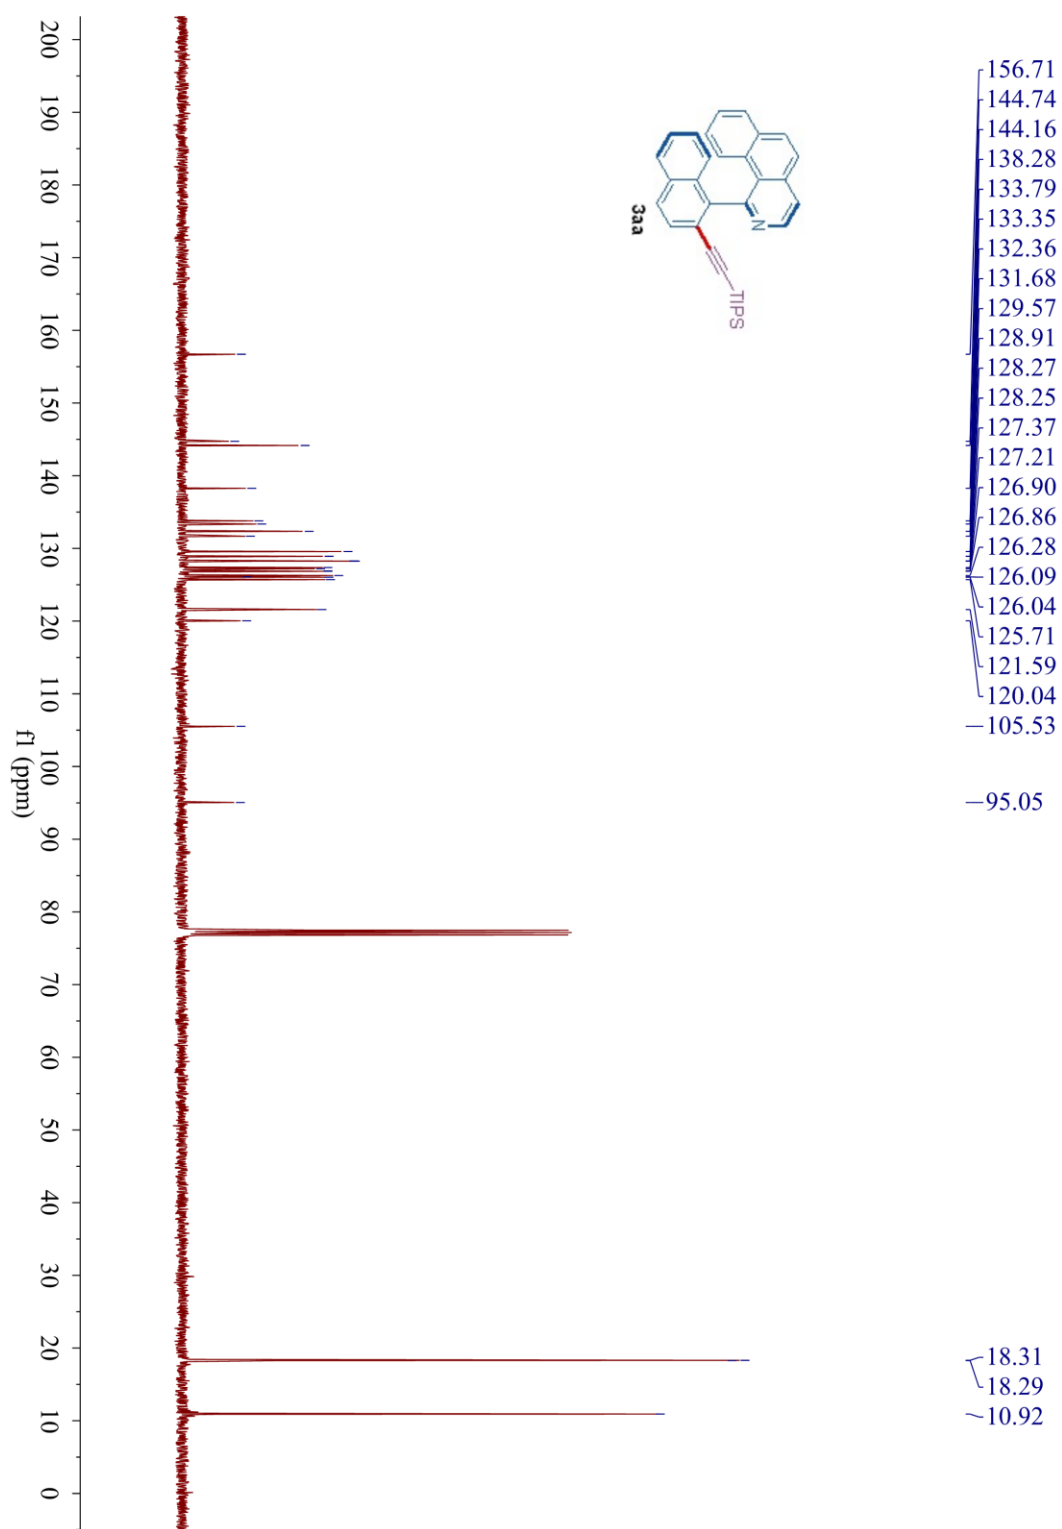

$^1\text{H}$  NMR (400 MHz,  $\text{CDCl}_3$ ) of **3ba**

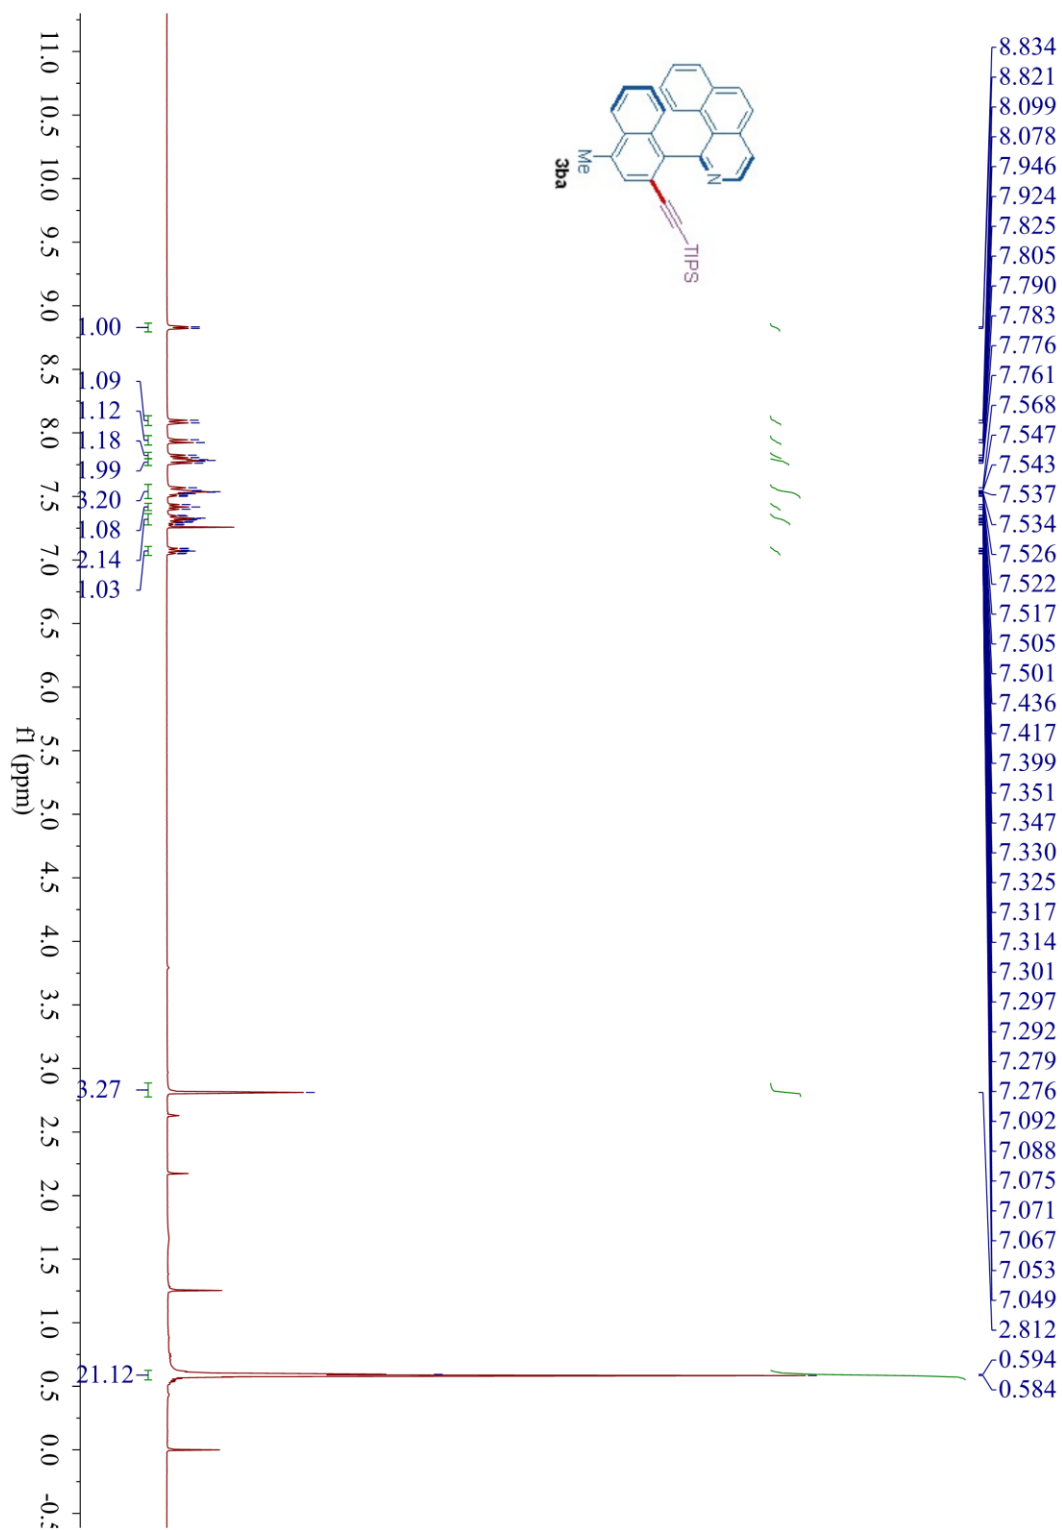

$^{13}\text{C}$  NMR (100 MHz,  $\text{CDCl}_3$ ) of **3ba**

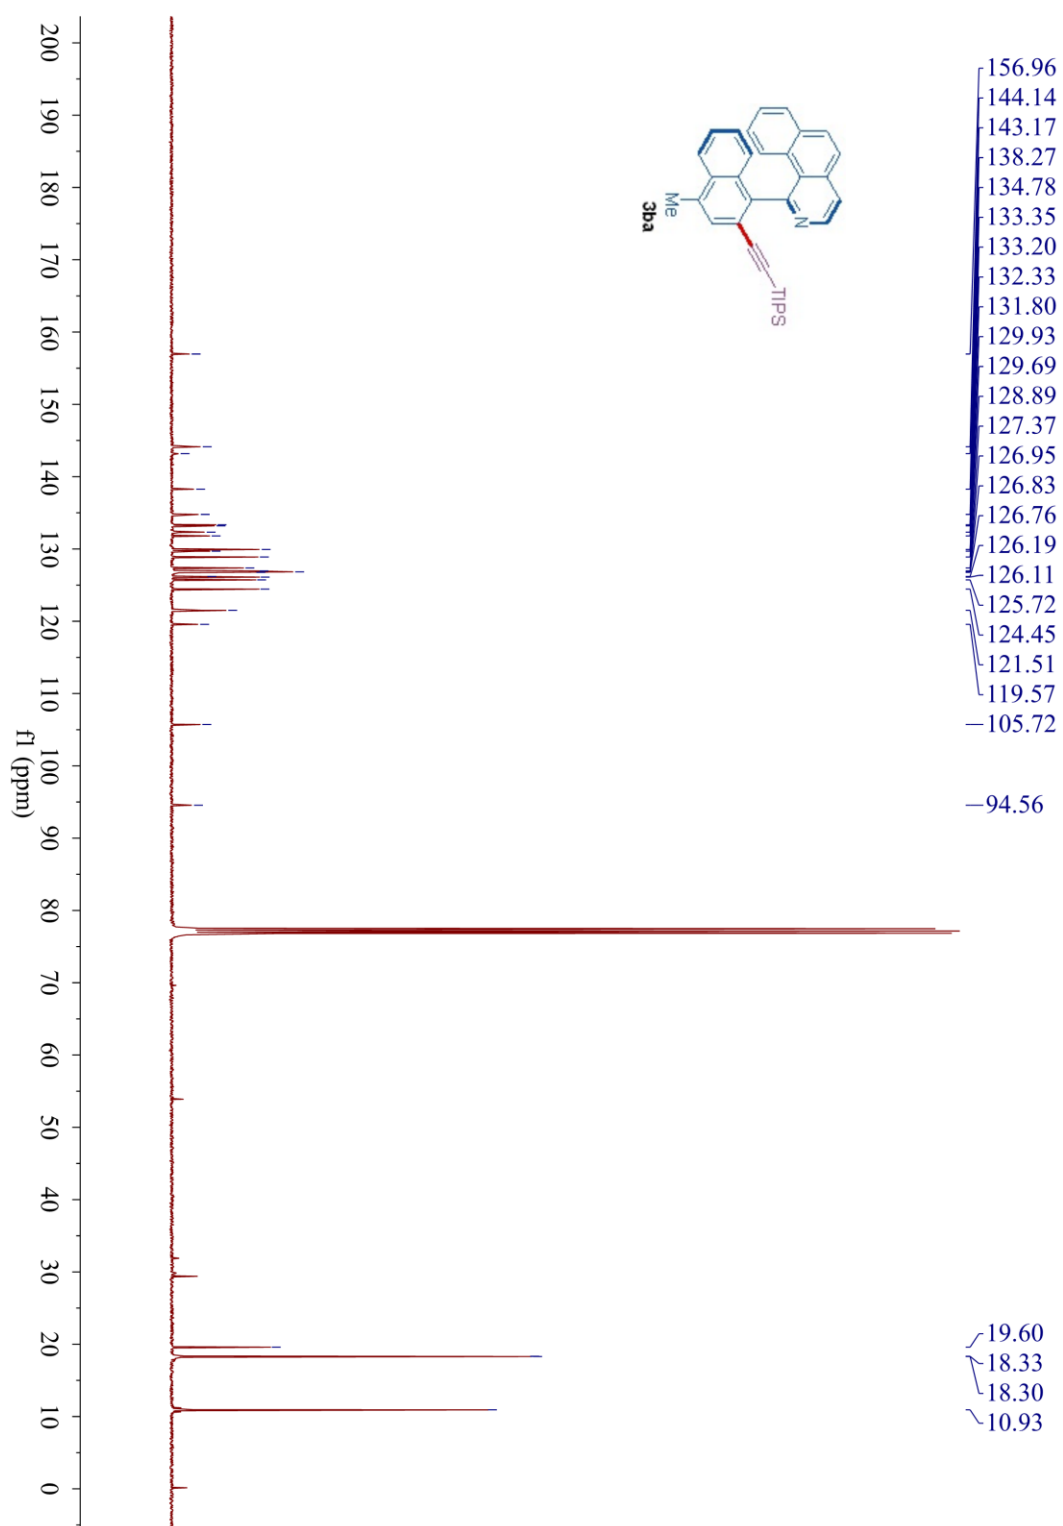



$^1\text{H}$  NMR (400 MHz,  $\text{CDCl}_3$ ) of **3ca**

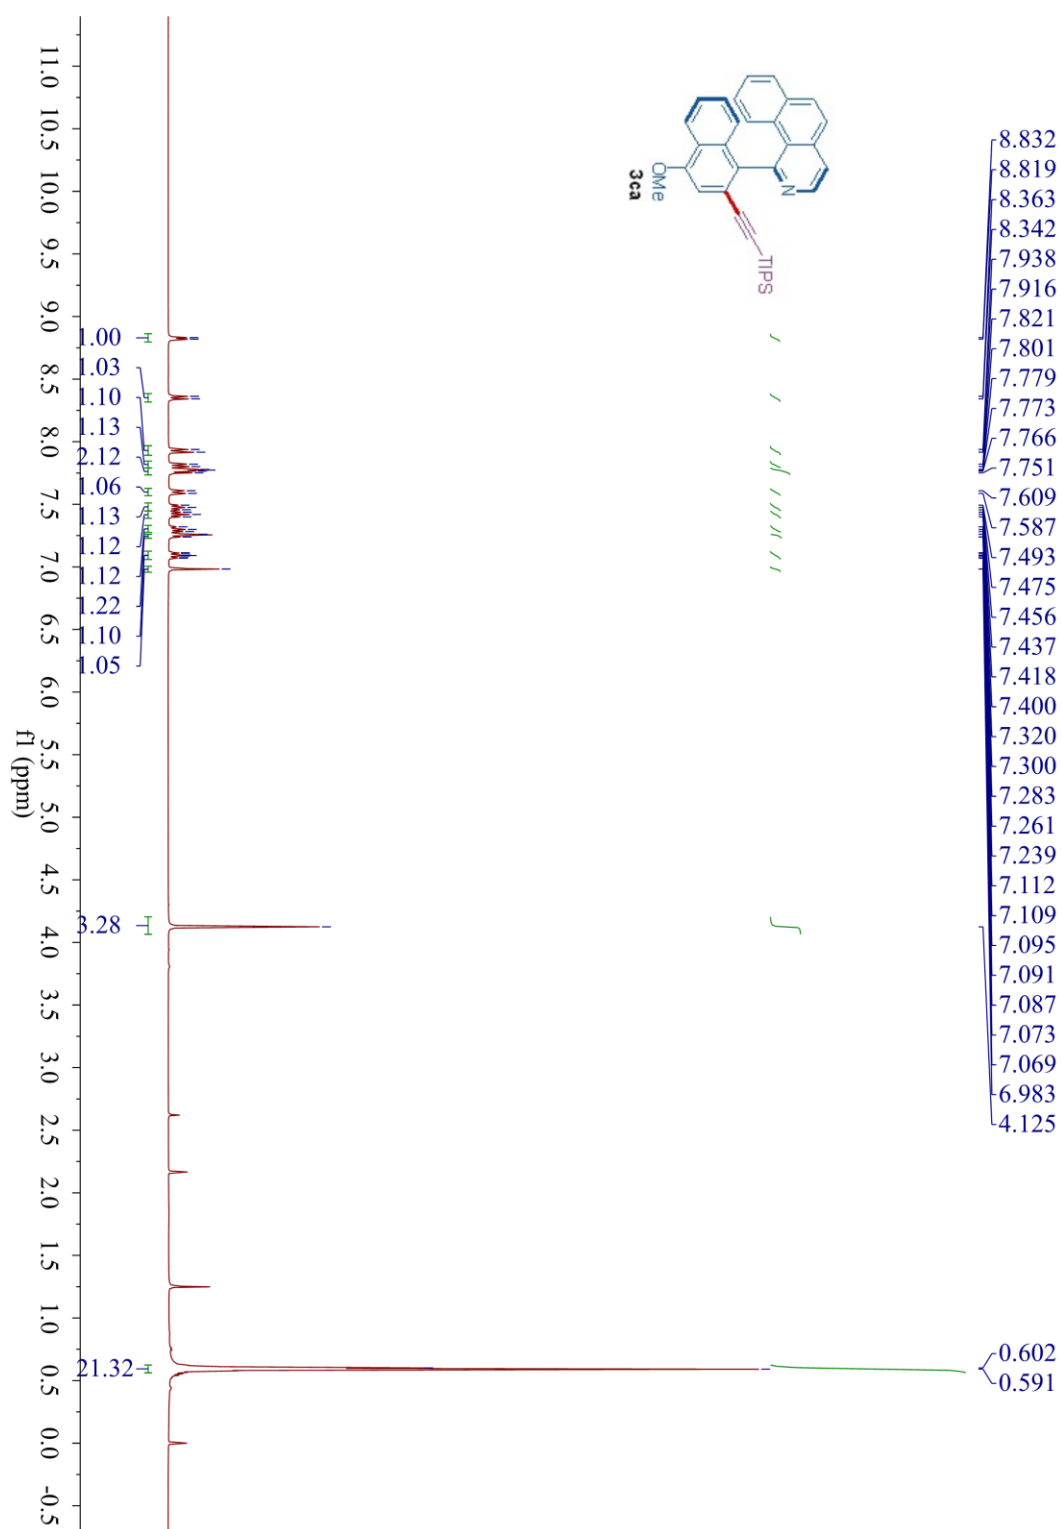

$^{13}\text{C}$  NMR (100 MHz,  $\text{CDCl}_3$ ) of **3ca**

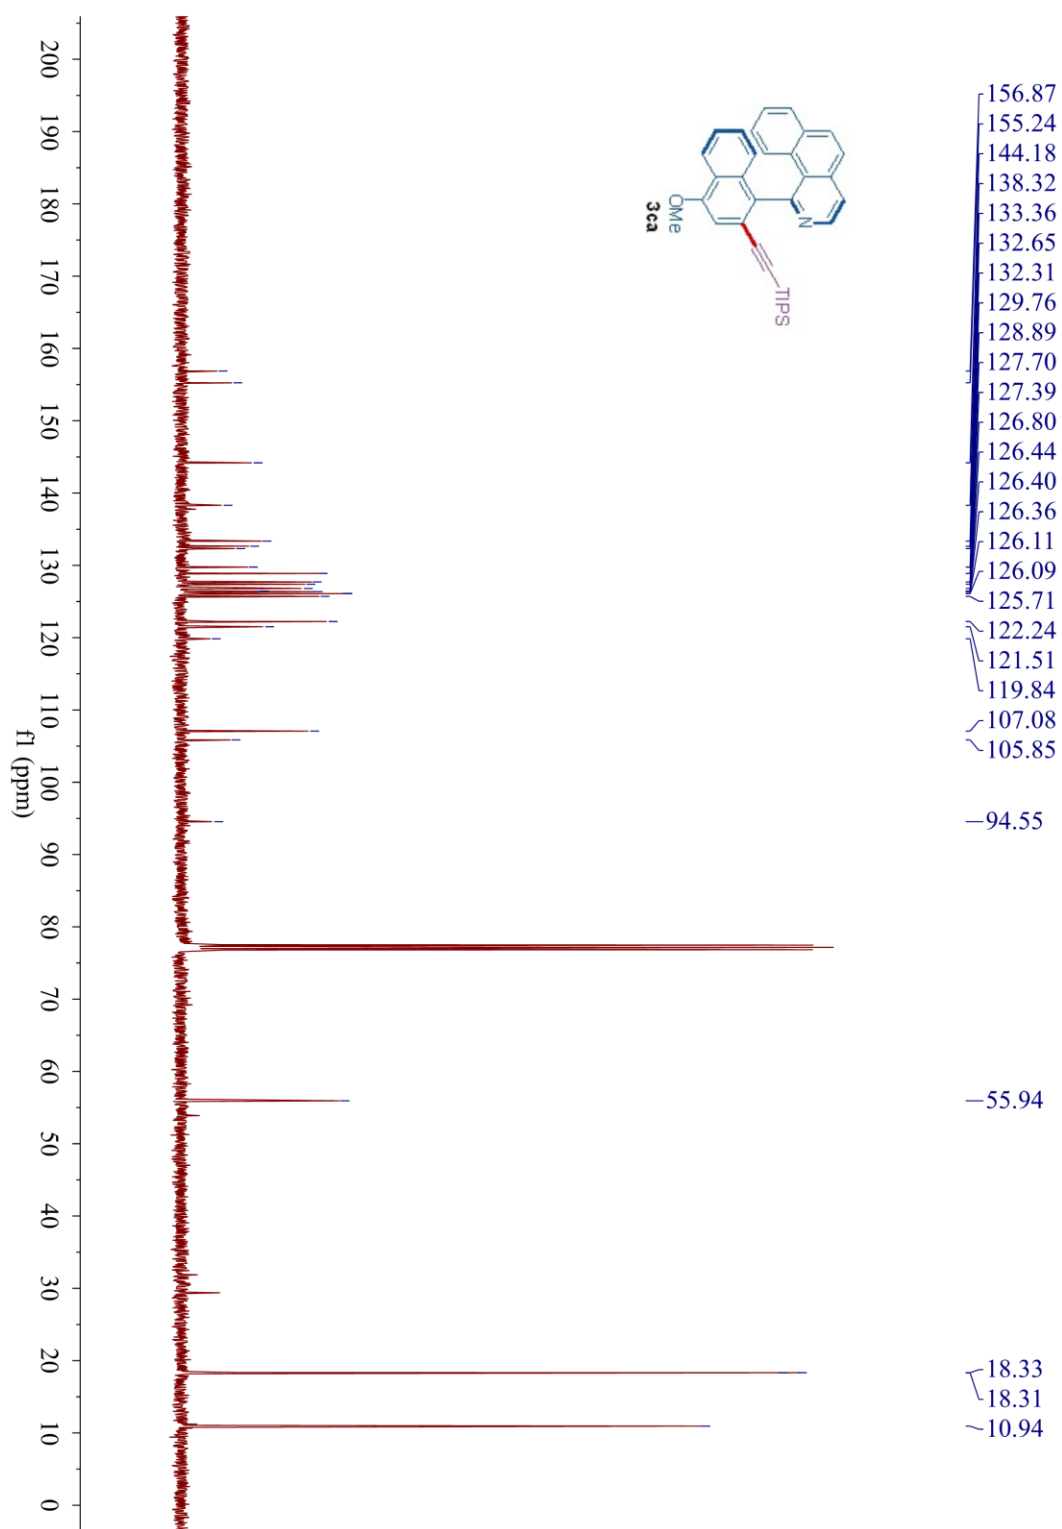

<sup>1</sup>H NMR (400 MHz, CDCl<sub>3</sub>) of **3da**

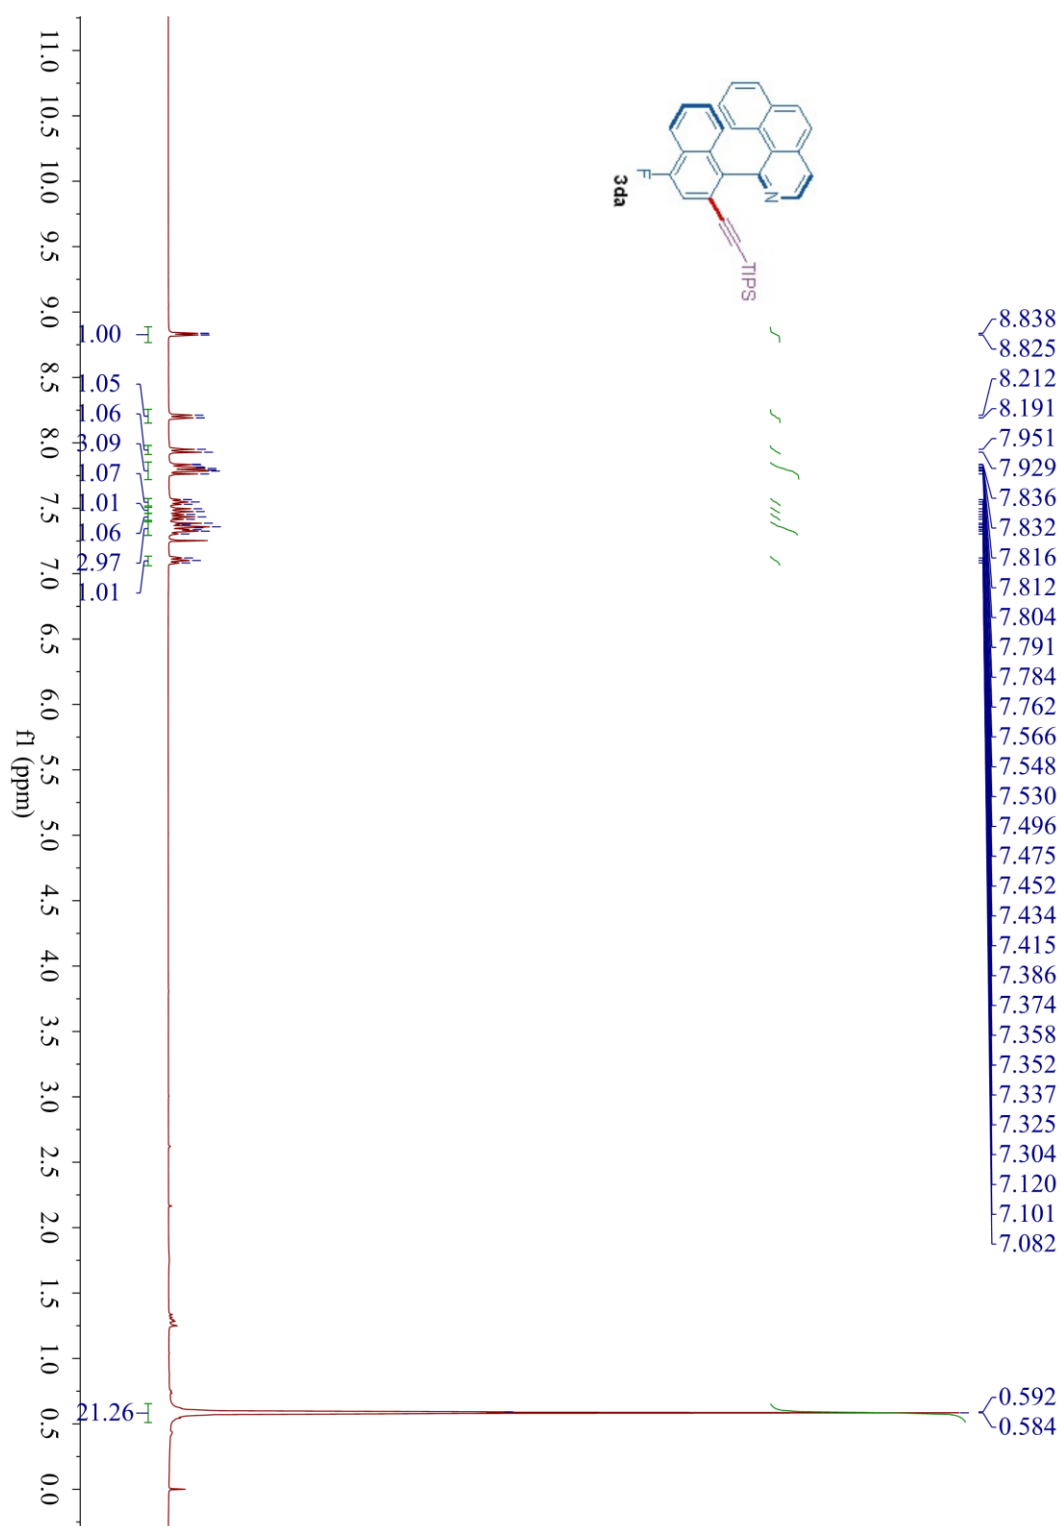

$^{13}\text{C}$  NMR (100 MHz,  $\text{CDCl}_3$ ) of **3da**

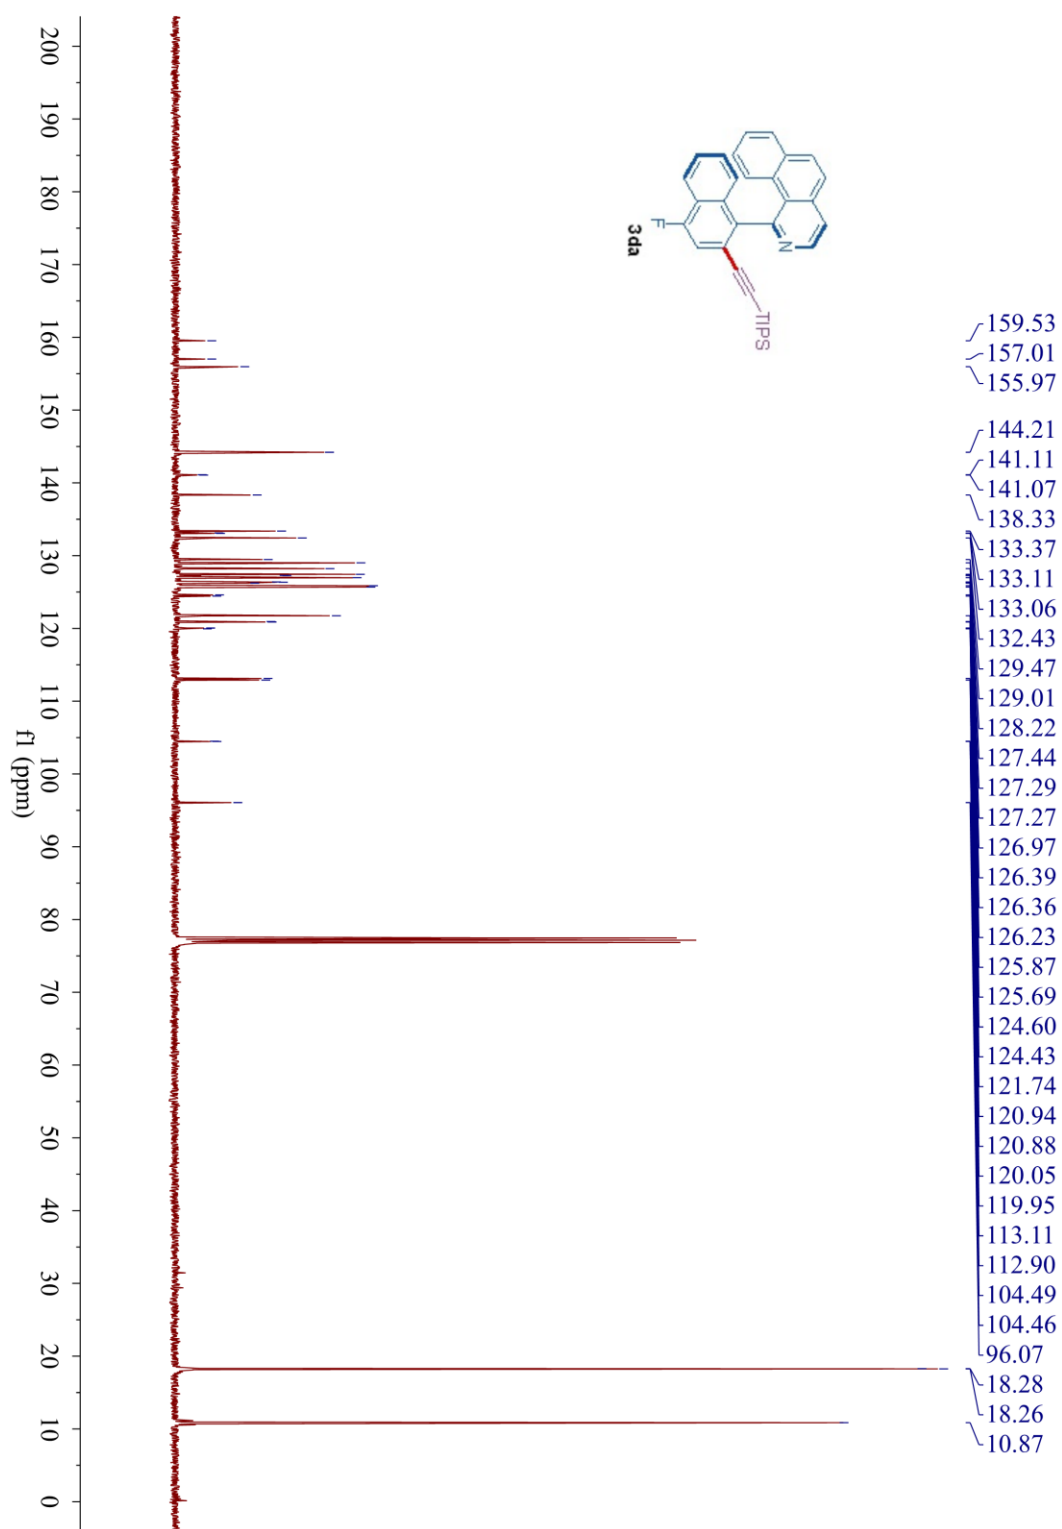

$^{19}\text{F}$  NMR (376 MHz,  $\text{CDCl}_3$ ) of **3da**

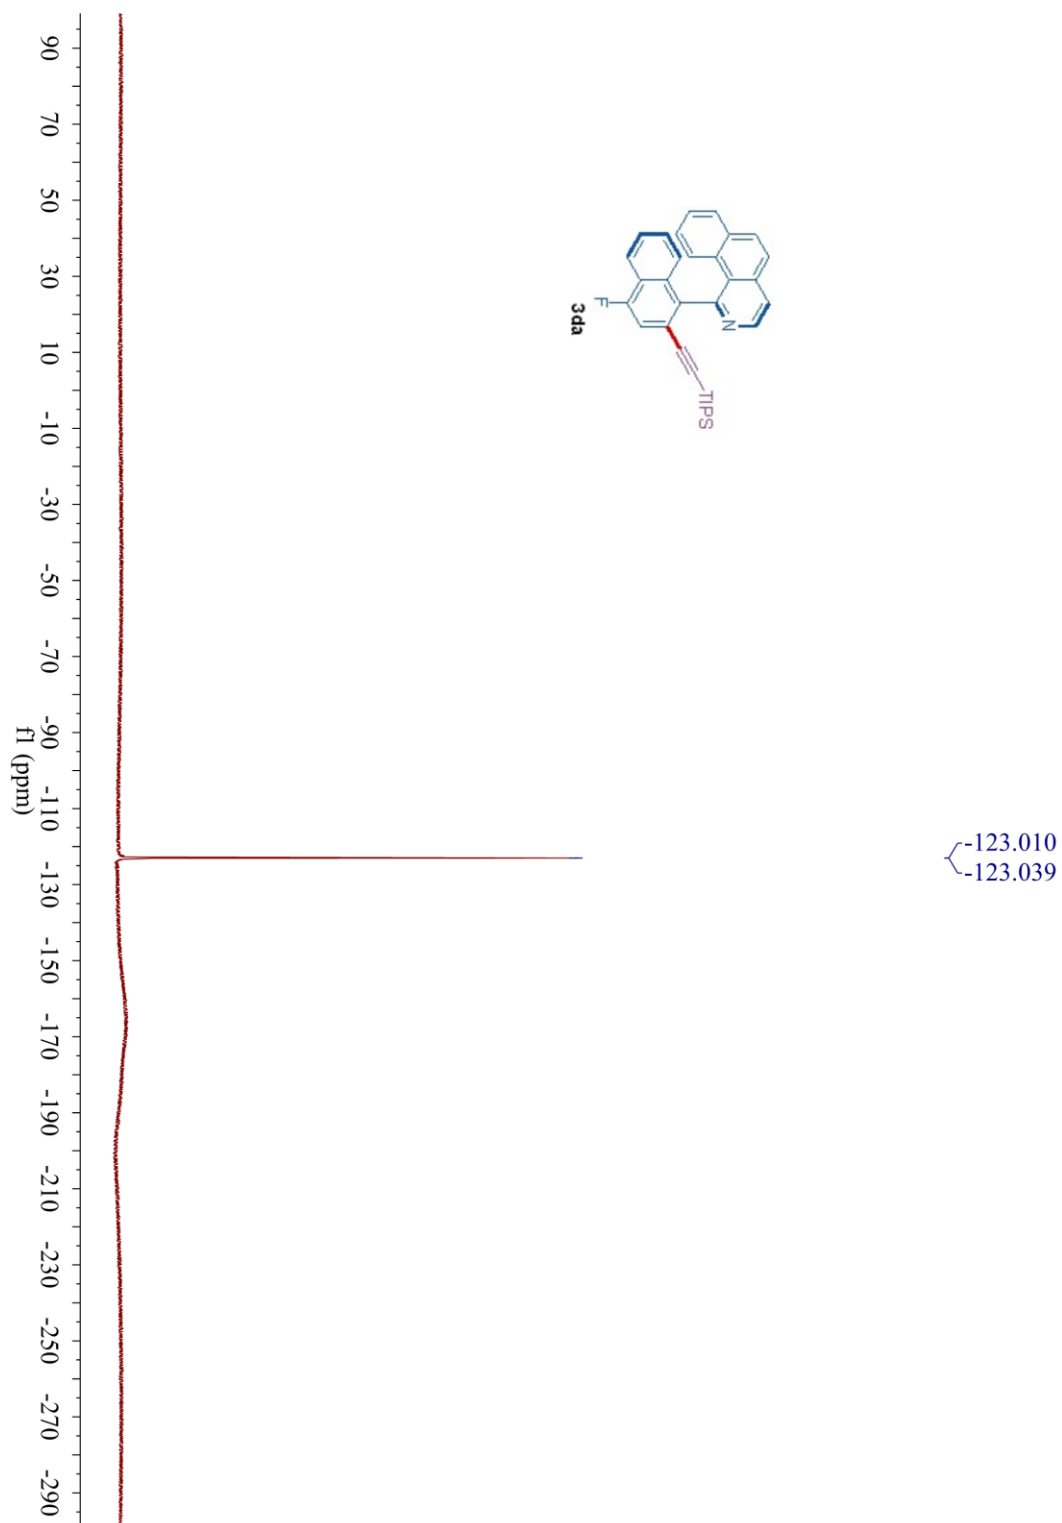

$^1\text{H}$  NMR (400 MHz,  $\text{CDCl}_3$ ) of **3ea**

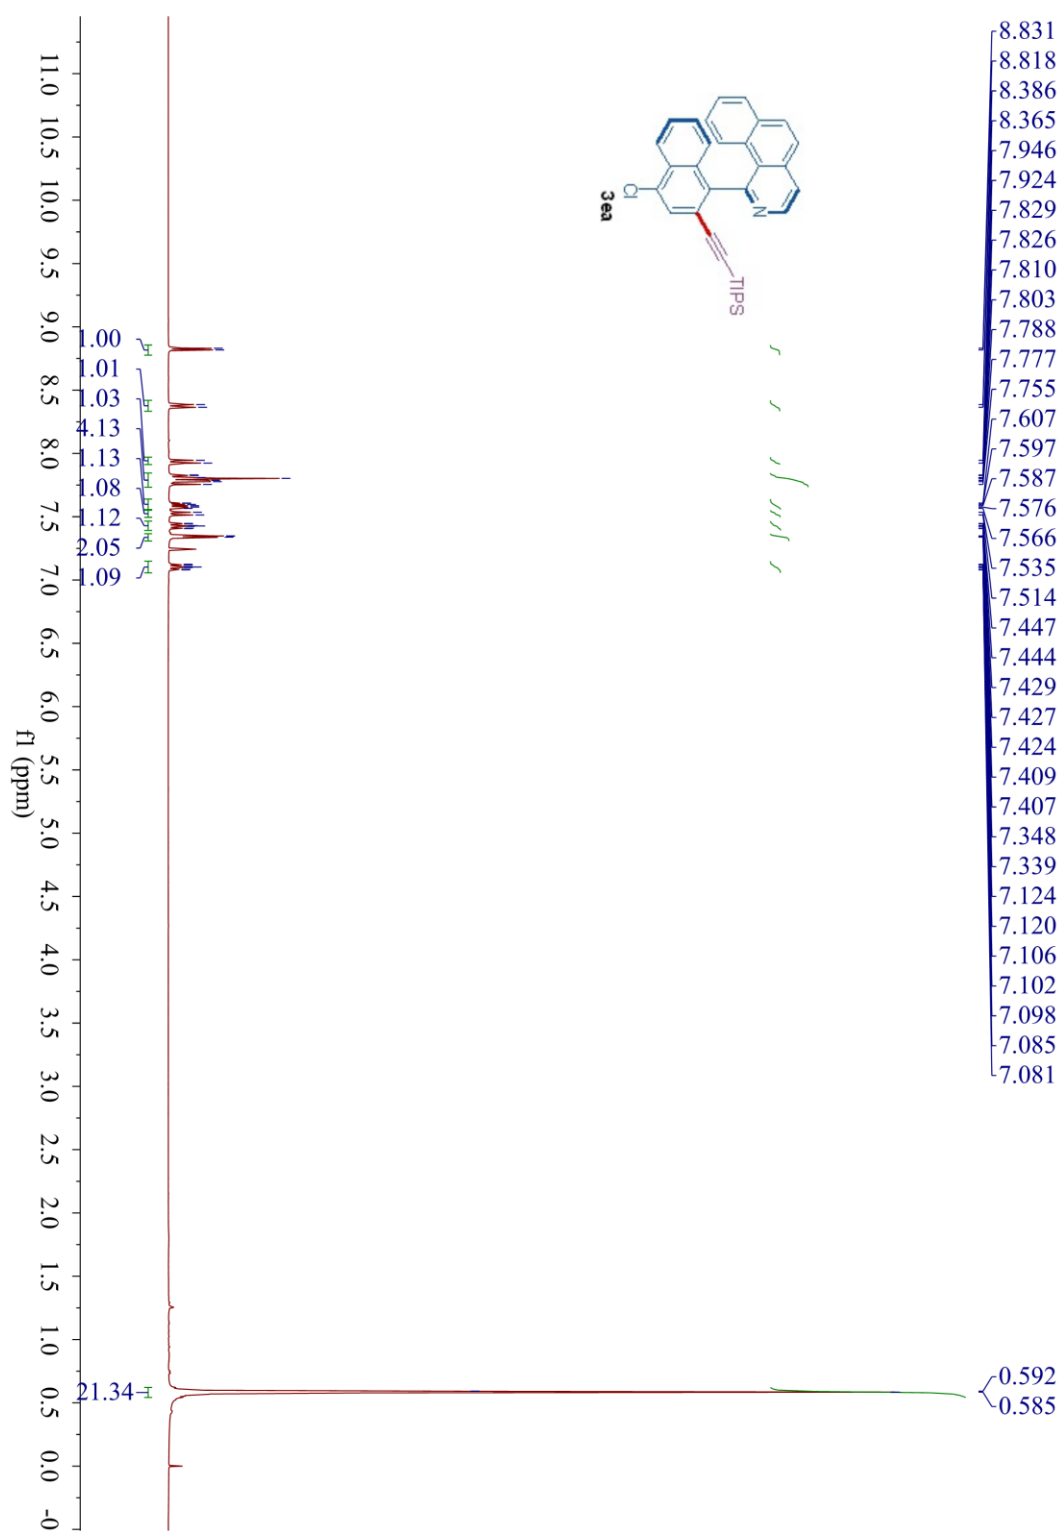

<sup>13</sup>C NMR (100 MHz, CDCl<sub>3</sub>) of **3ea**

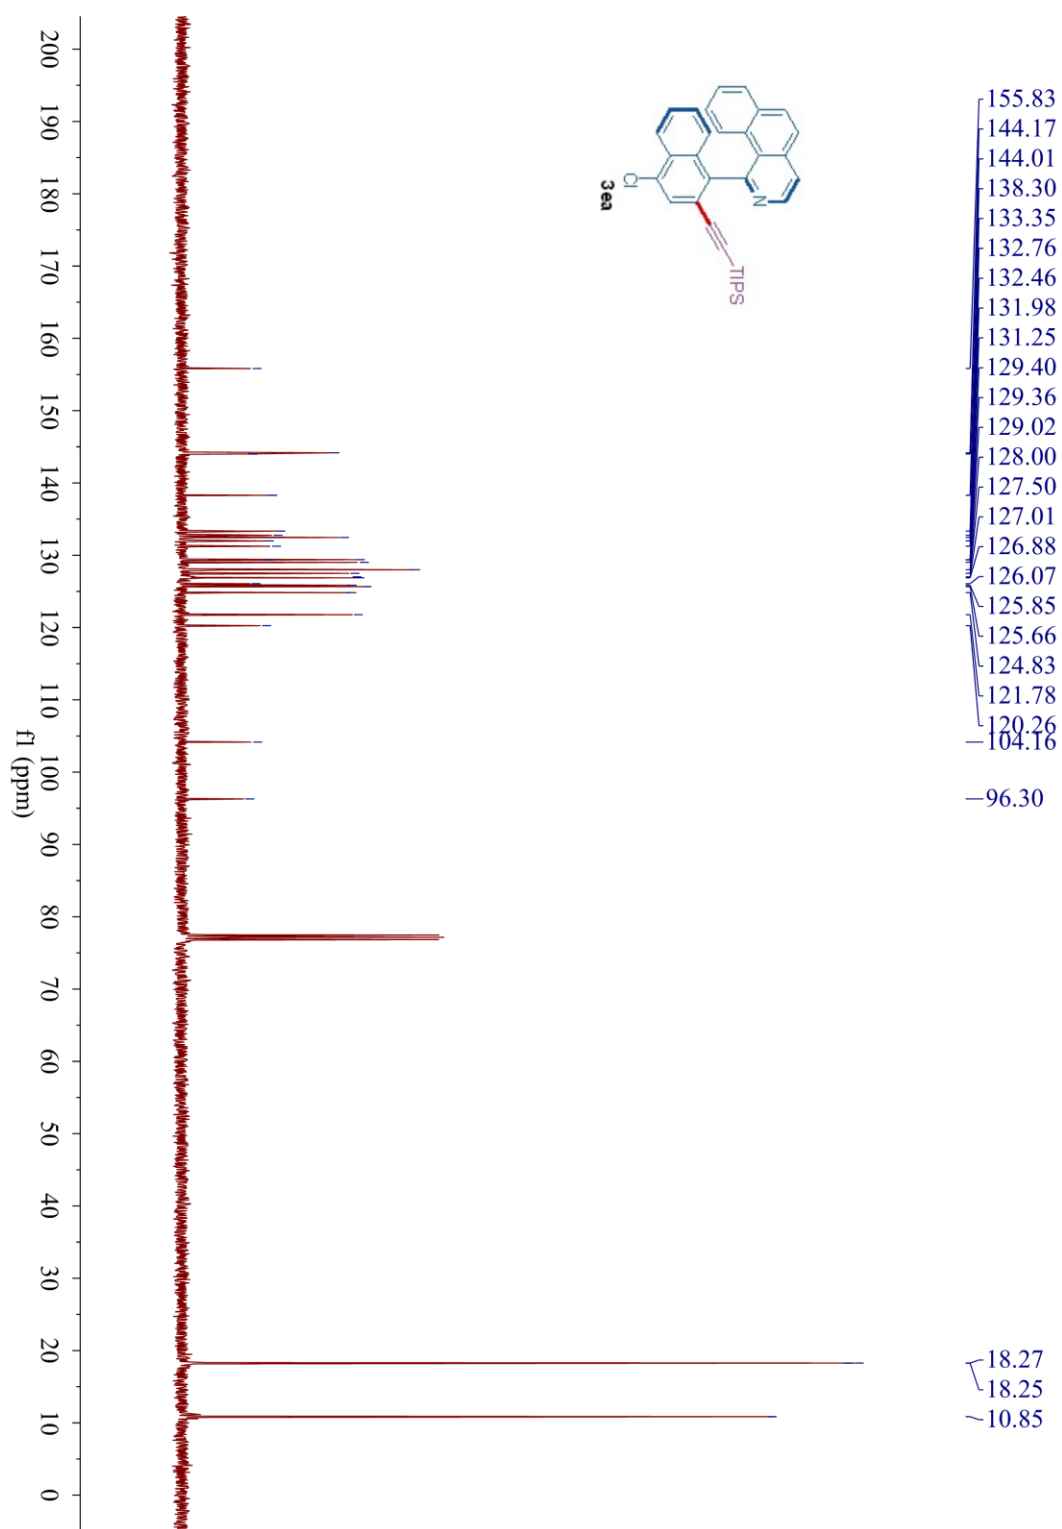

$^1\text{H}$  NMR (400 MHz,  $\text{CDCl}_3$ ) of **3fa**

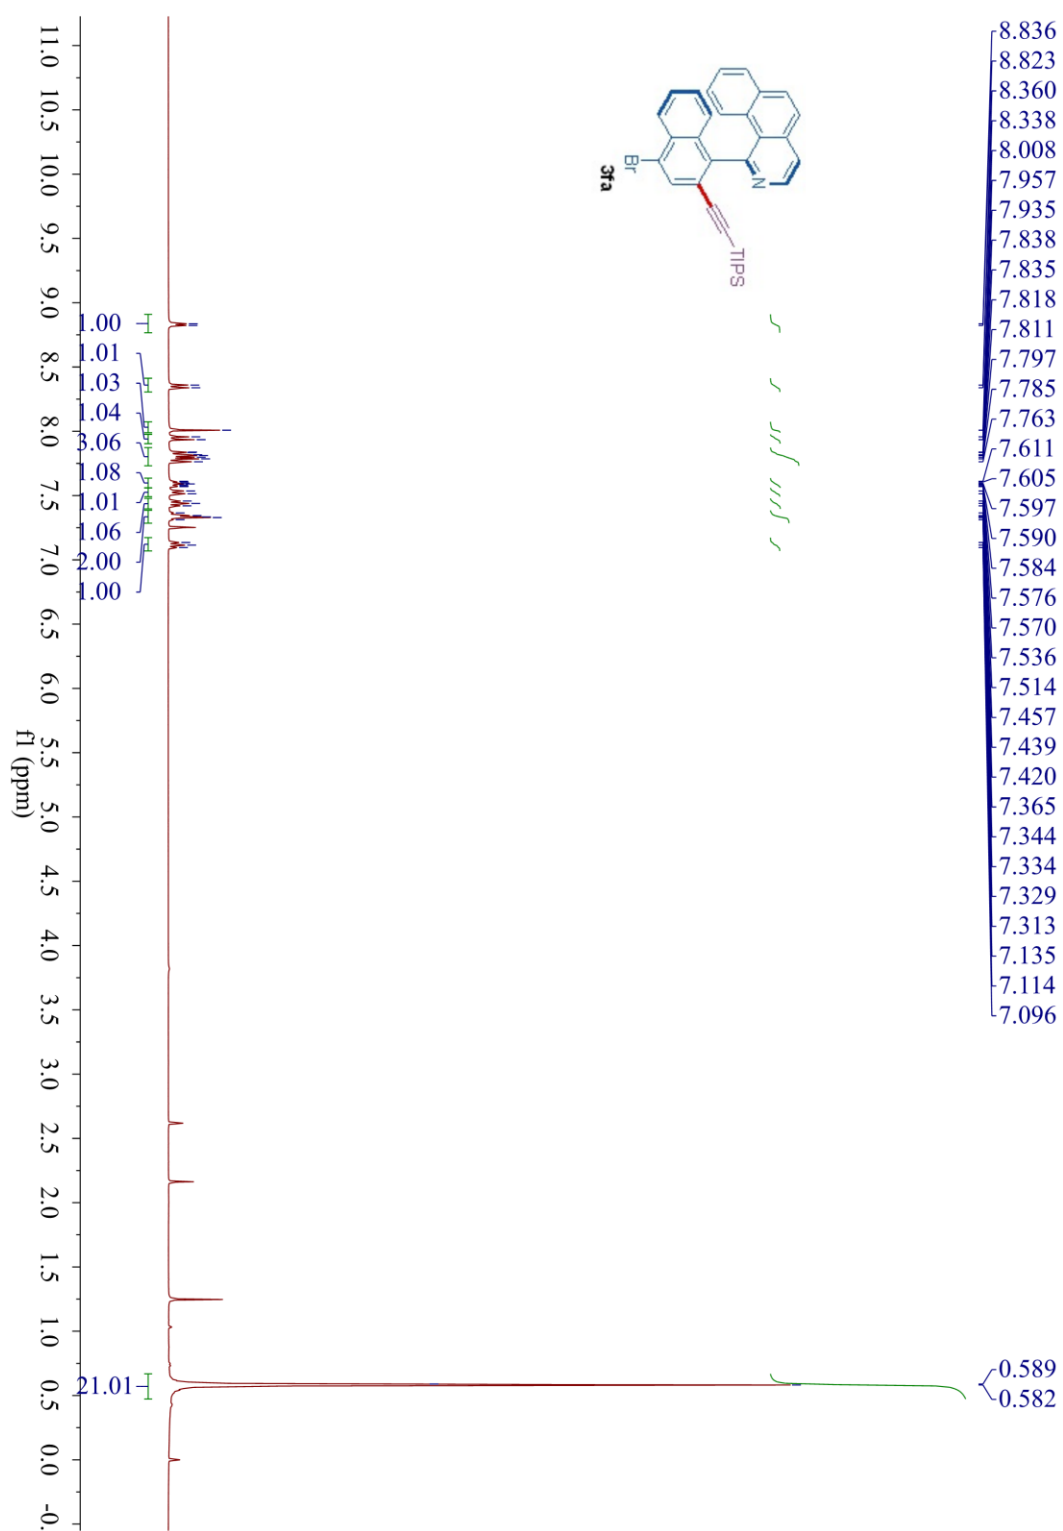



$^{13}\text{C}$  NMR (100 MHz,  $\text{CDCl}_3$ ) of **3fa**

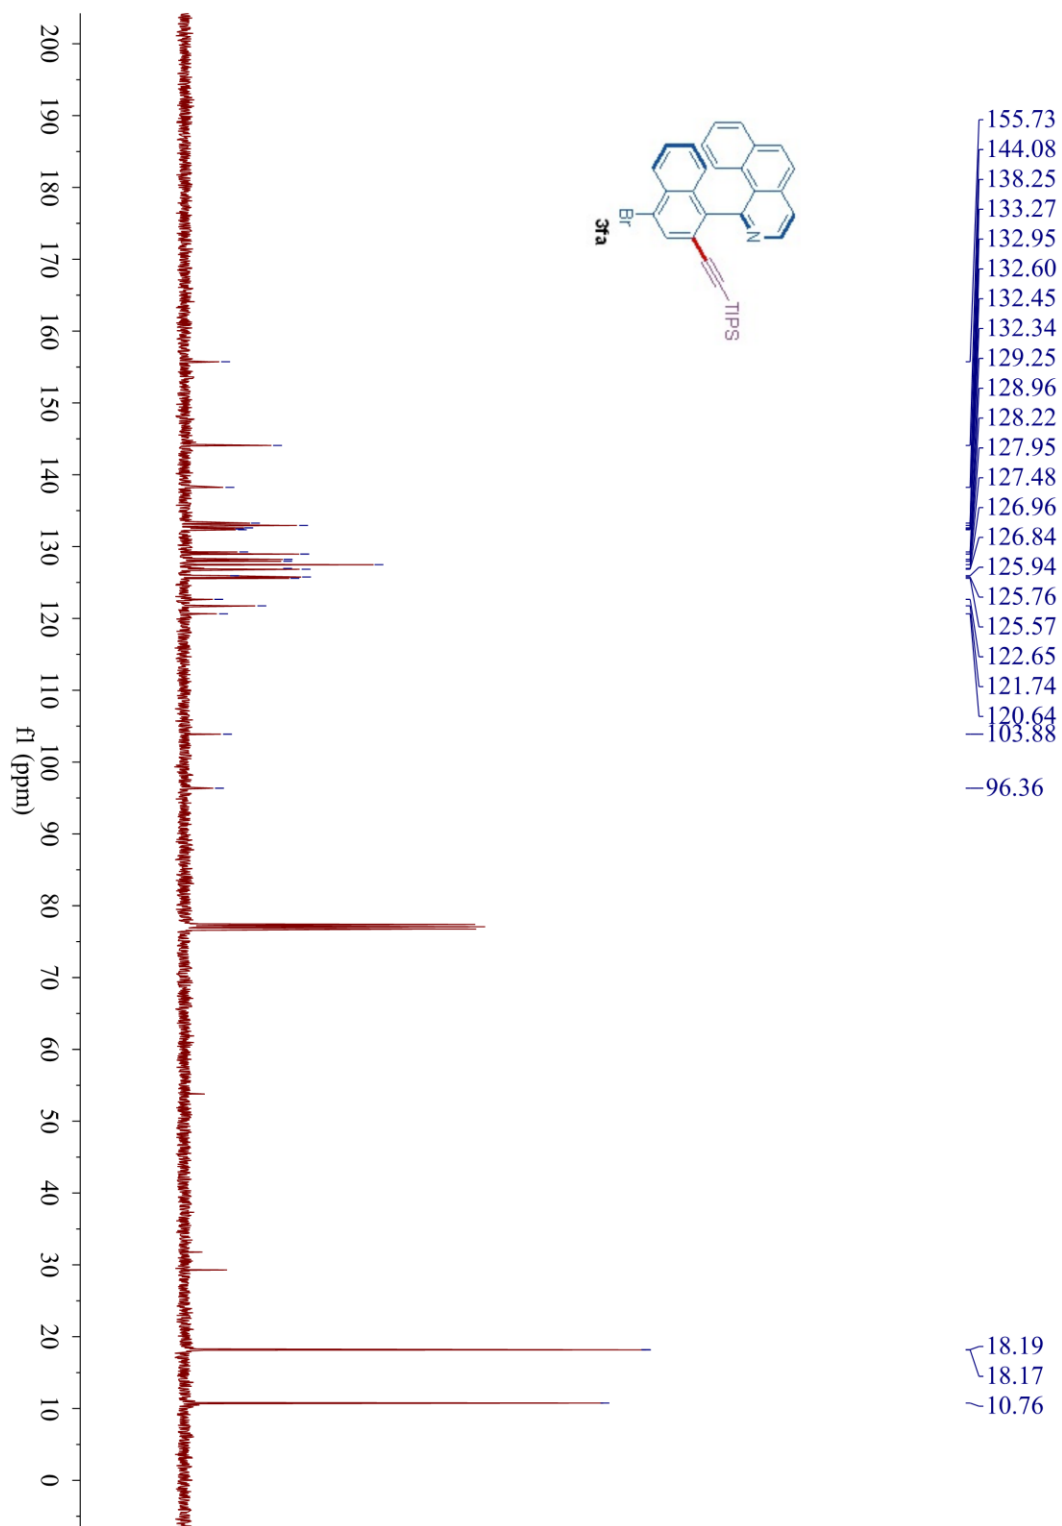

<sup>1</sup>H NMR (400 MHz, CDCl<sub>3</sub>) of **3ga**

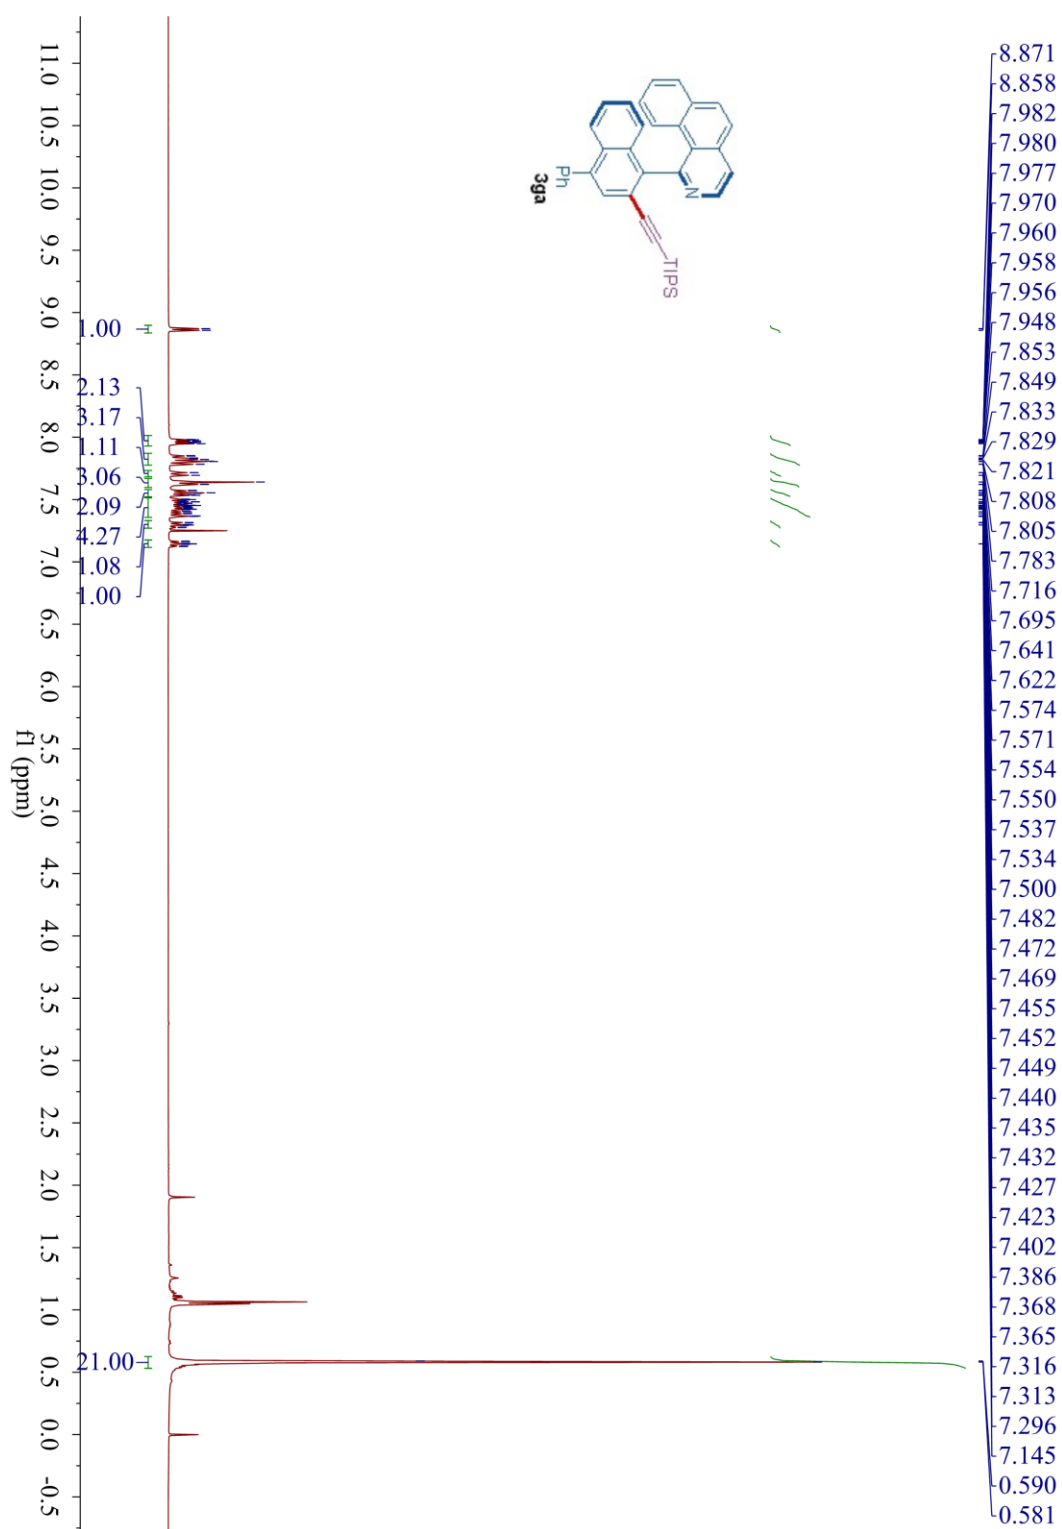

$^{13}\text{C}$  NMR (100 MHz,  $\text{CDCl}_3$ ) of **3ga**

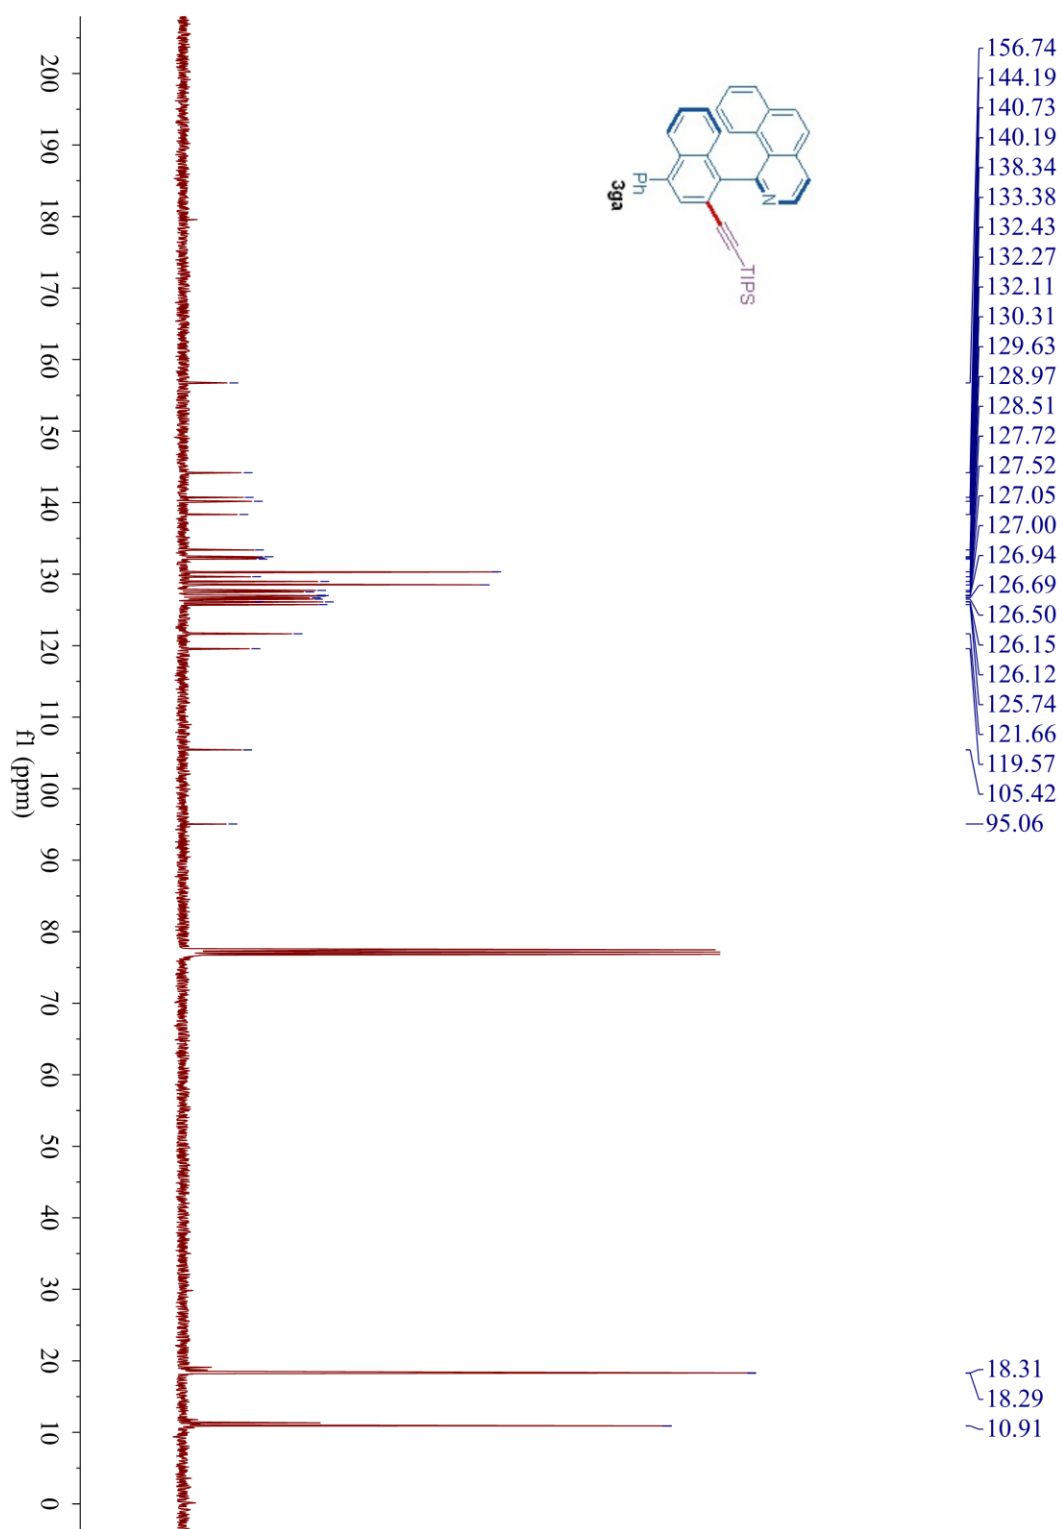

$^1\text{H}$  NMR (400 MHz,  $\text{CDCl}_3$ ) of **3ha**

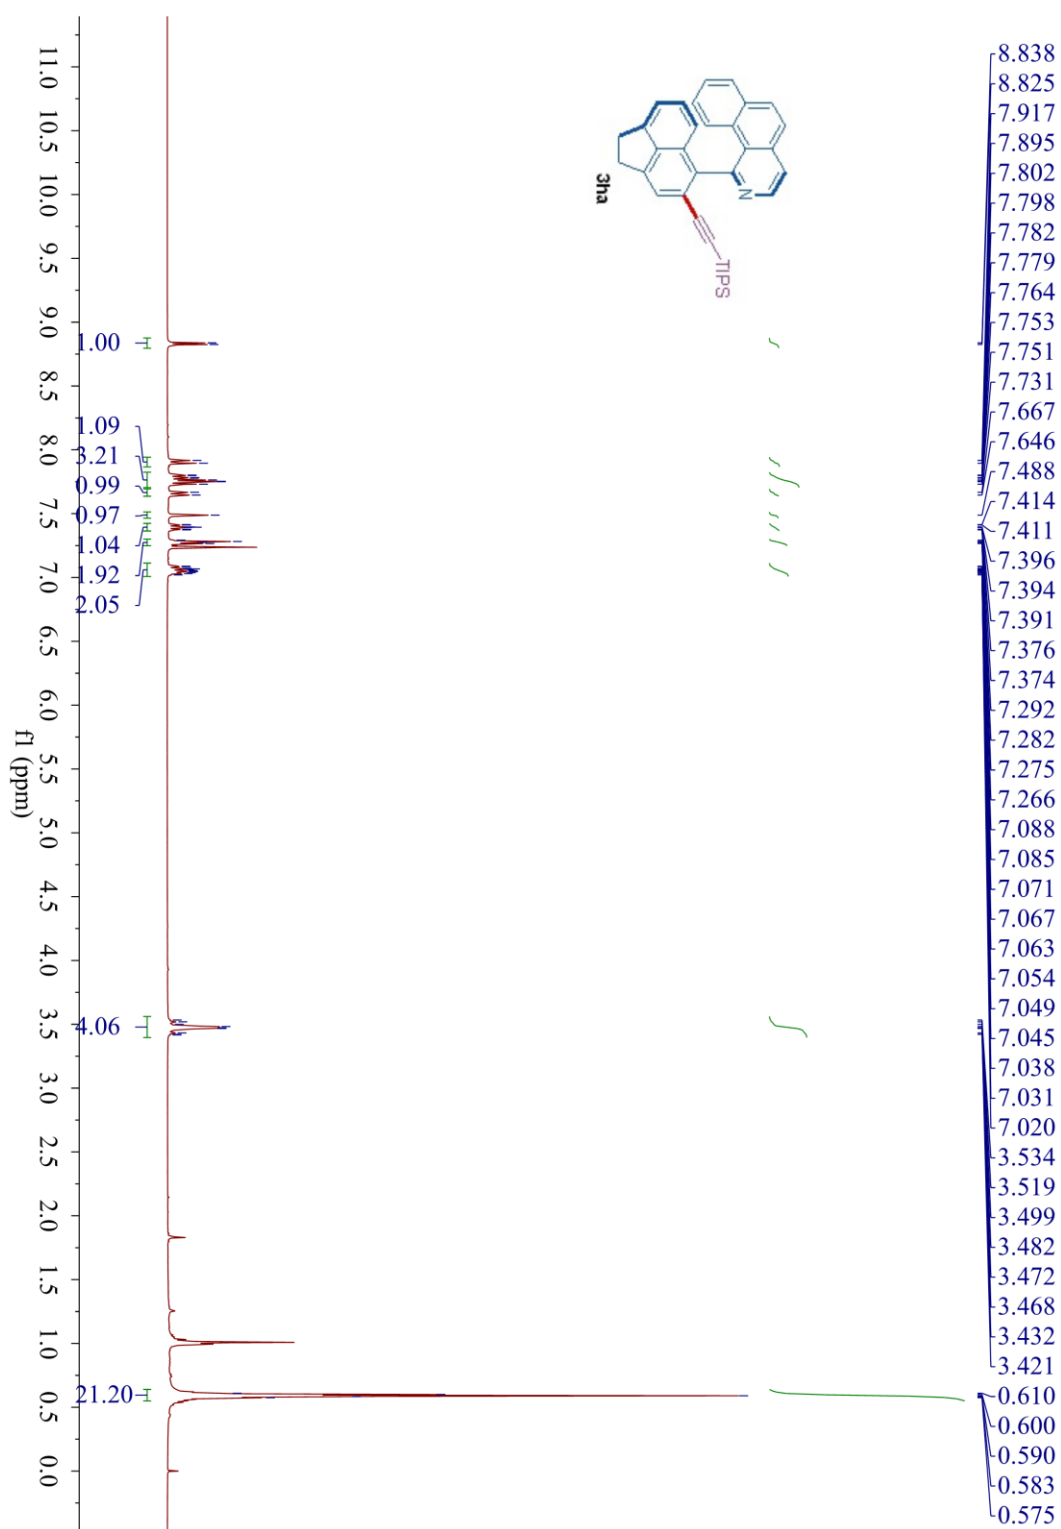

$^{13}\text{C}$  NMR (100 MHz,  $\text{CDCl}_3$ ) of **3ha**

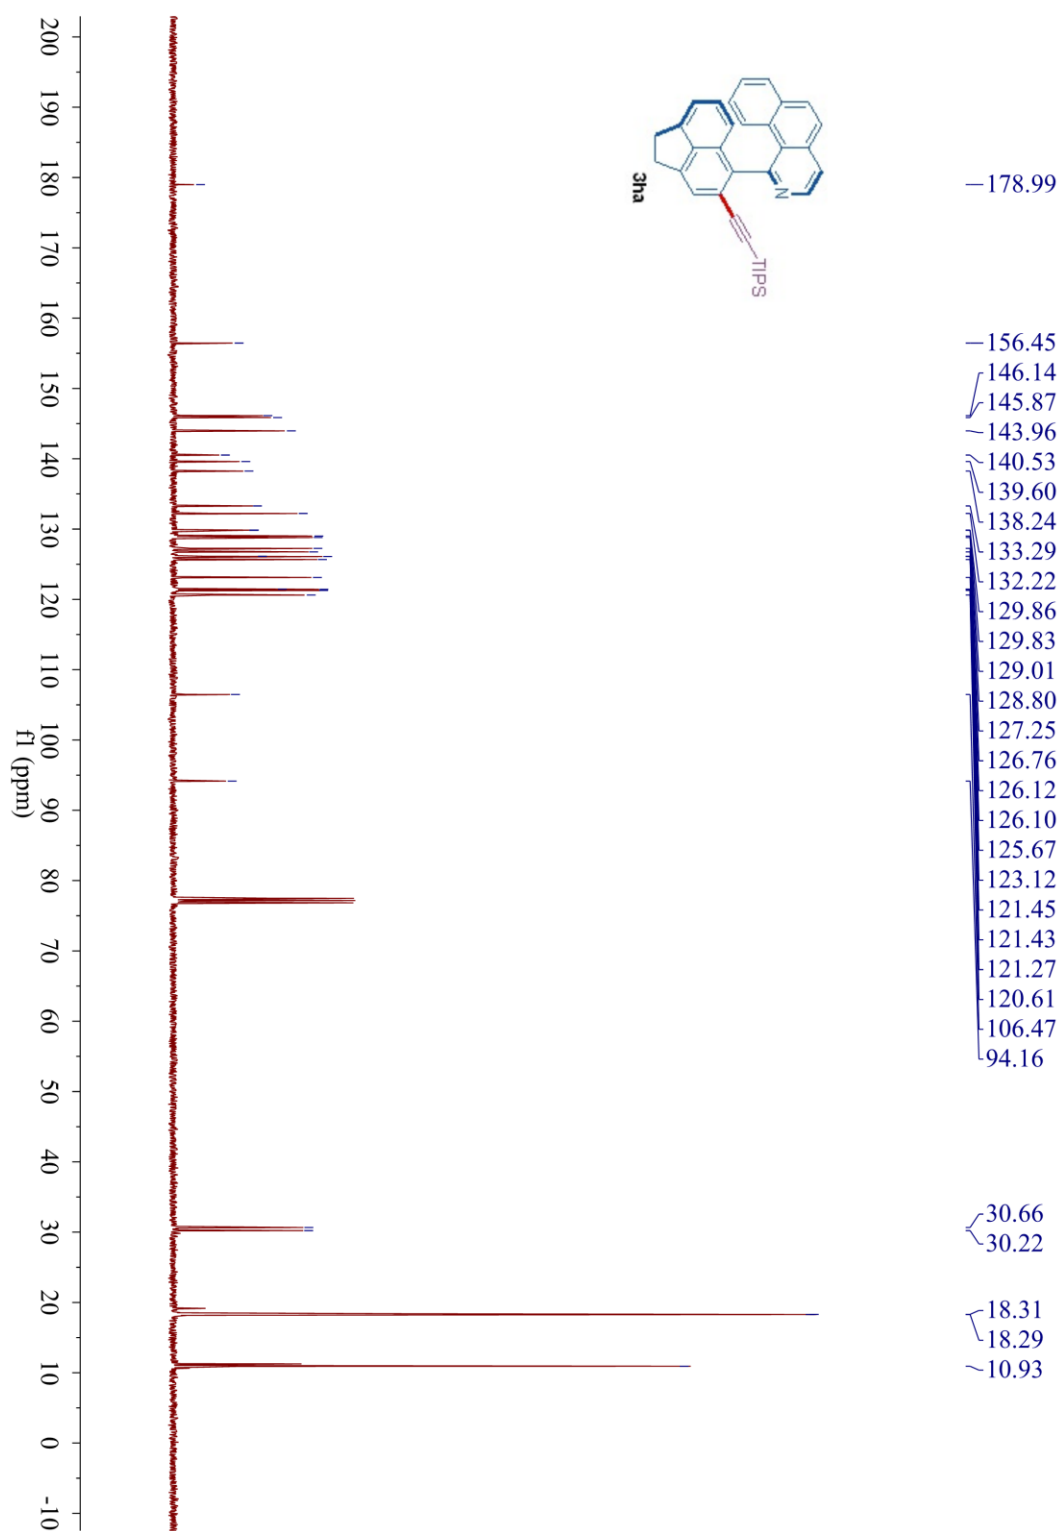

$^1\text{H}$  NMR (400 MHz,  $\text{CDCl}_3$ ) of **3ia**

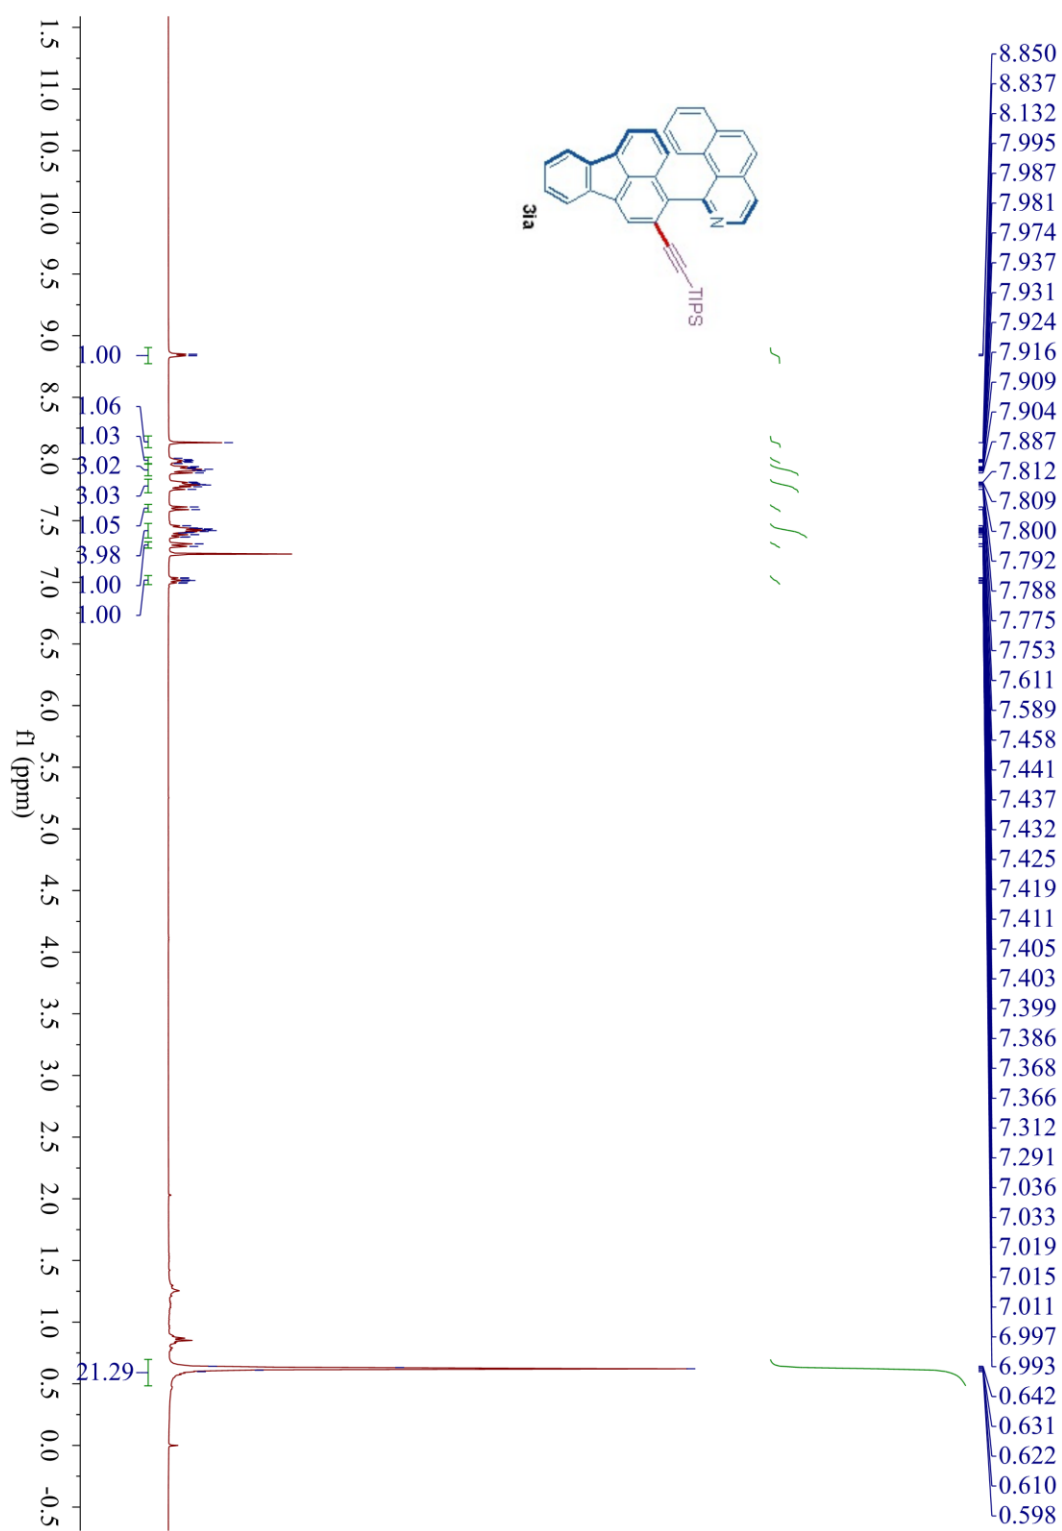

$^{13}\text{C}$  NMR (100 MHz,  $\text{CDCl}_3$ ) of **3ia**

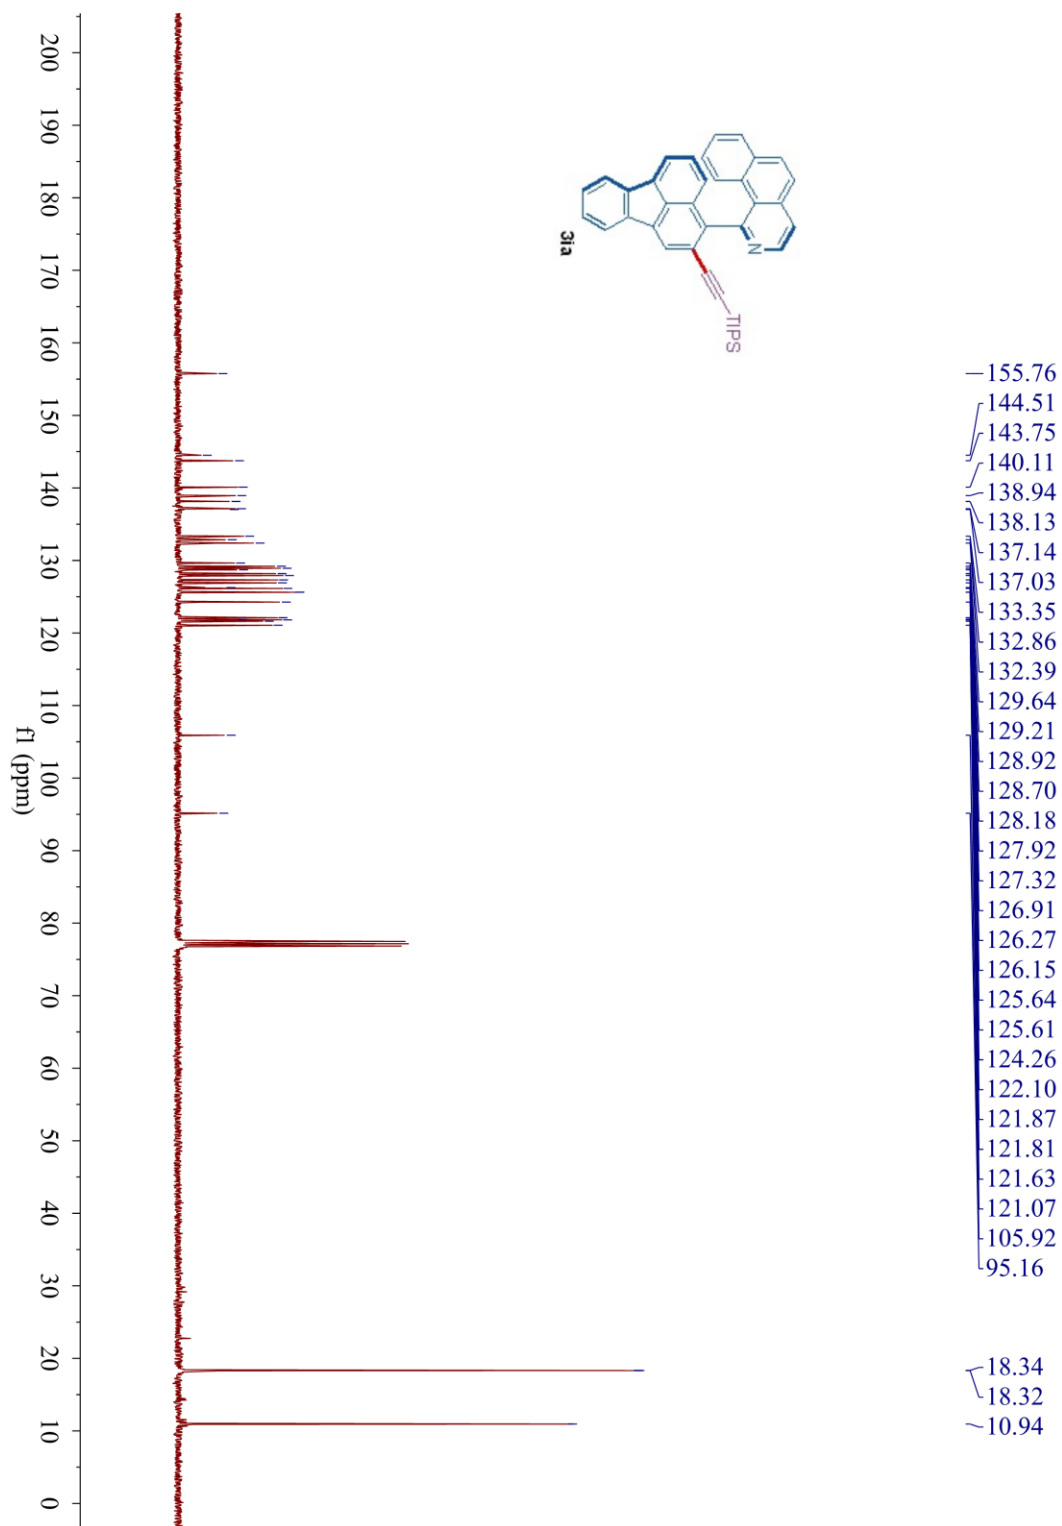

$^1\text{H}$  NMR (400 MHz,  $\text{CDCl}_3$ ) of **3ja**

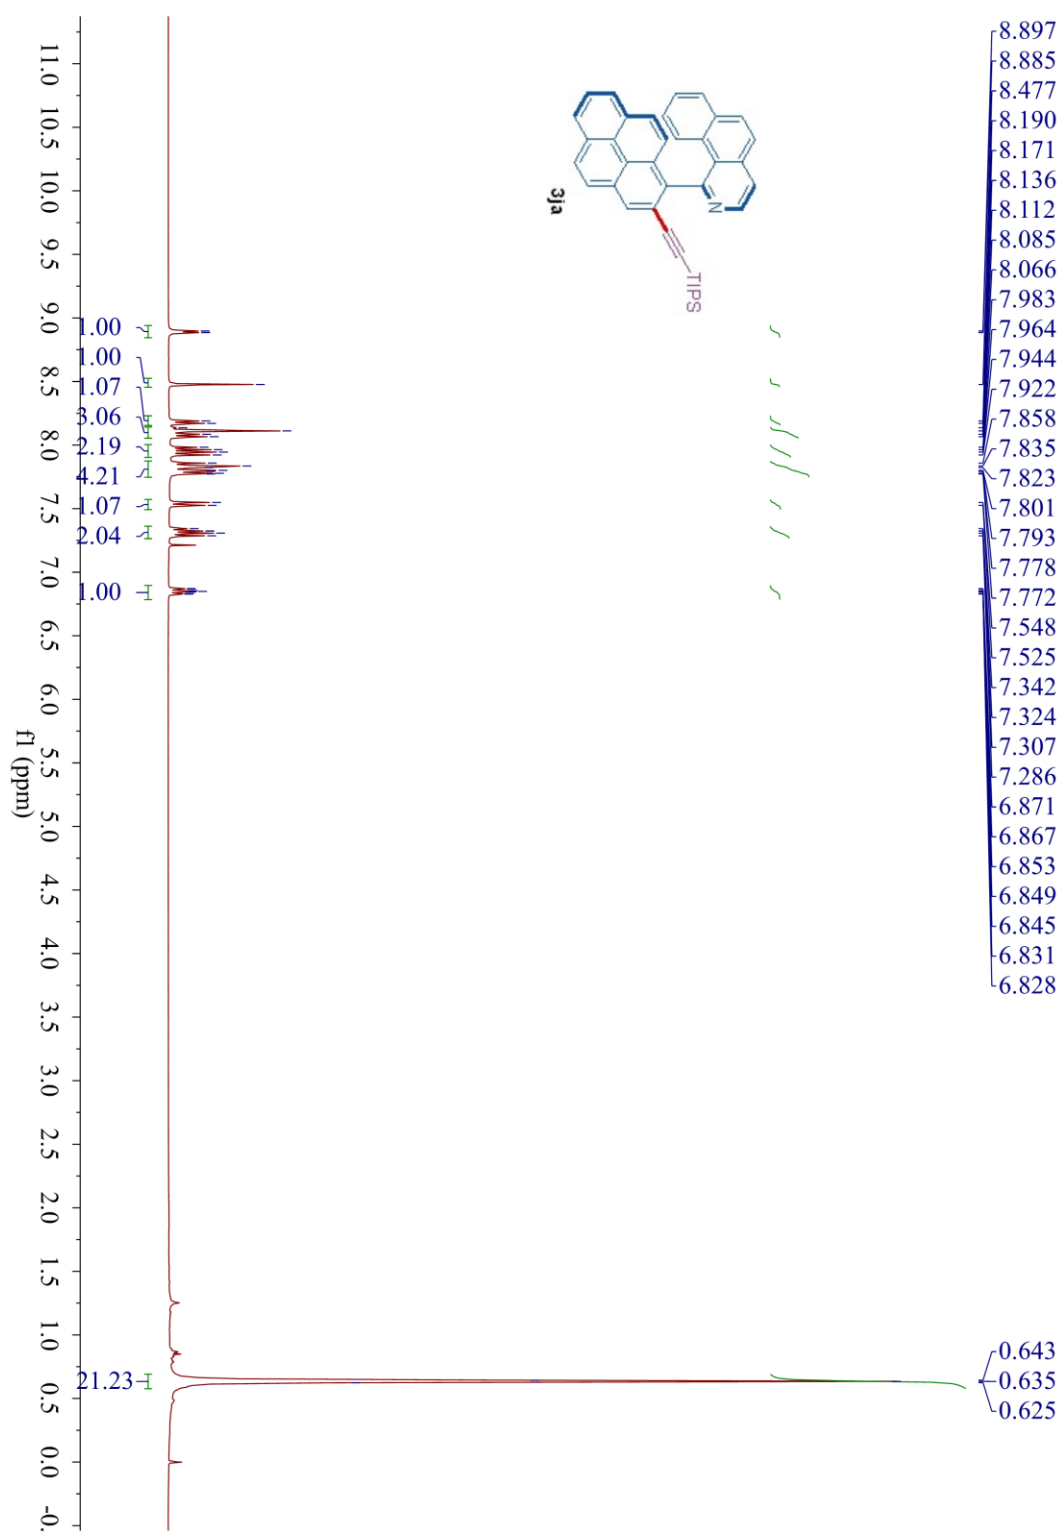



$^{13}\text{C}$  NMR (100 MHz,  $\text{CDCl}_3$ ) of **3ja**

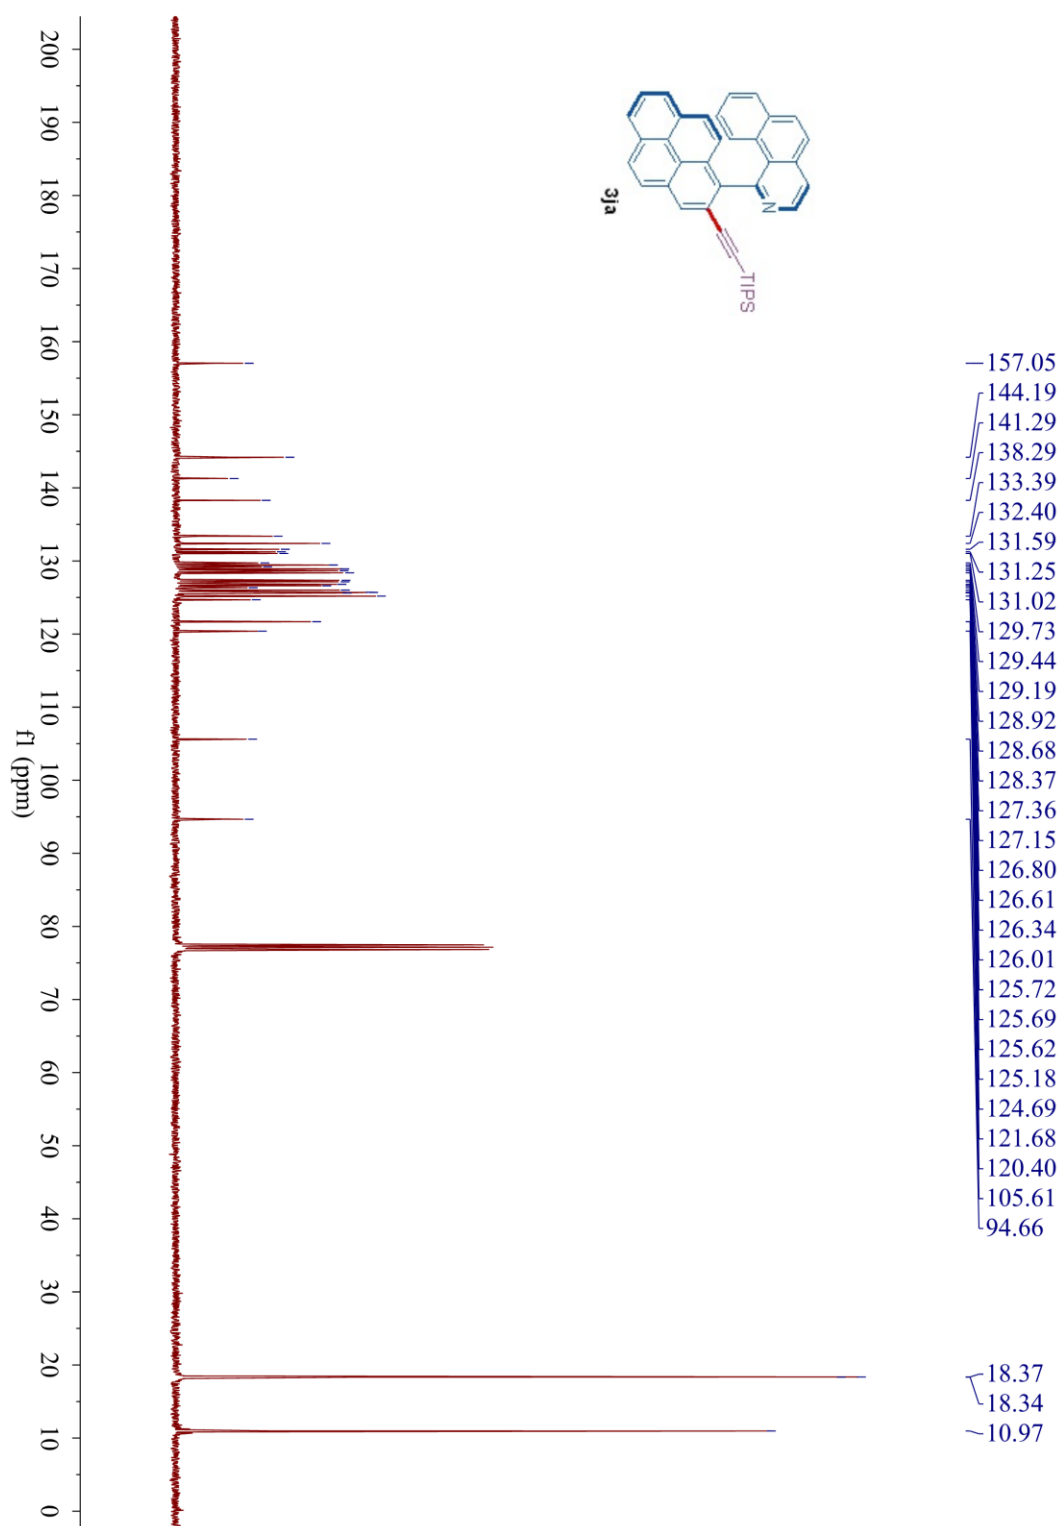

$^1\text{H}$  NMR (400 MHz,  $\text{CDCl}_3$ ) of **3ka**

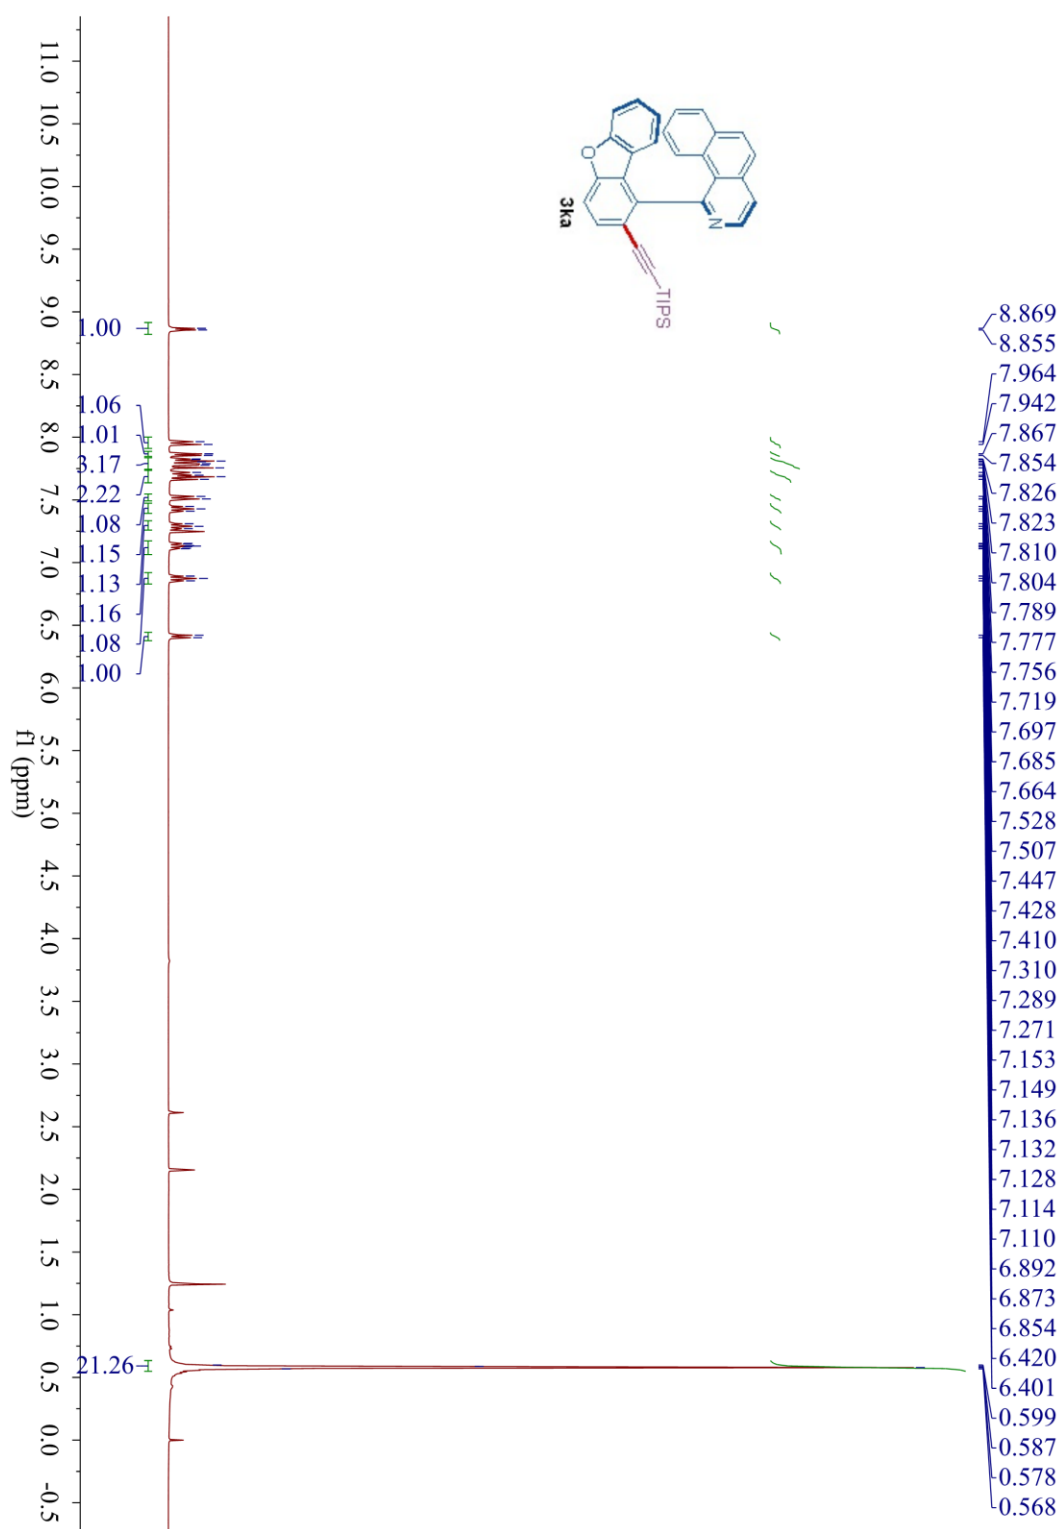

$^{13}\text{C}$  NMR (100 MHz,  $\text{CDCl}_3$ ) of **3ka**

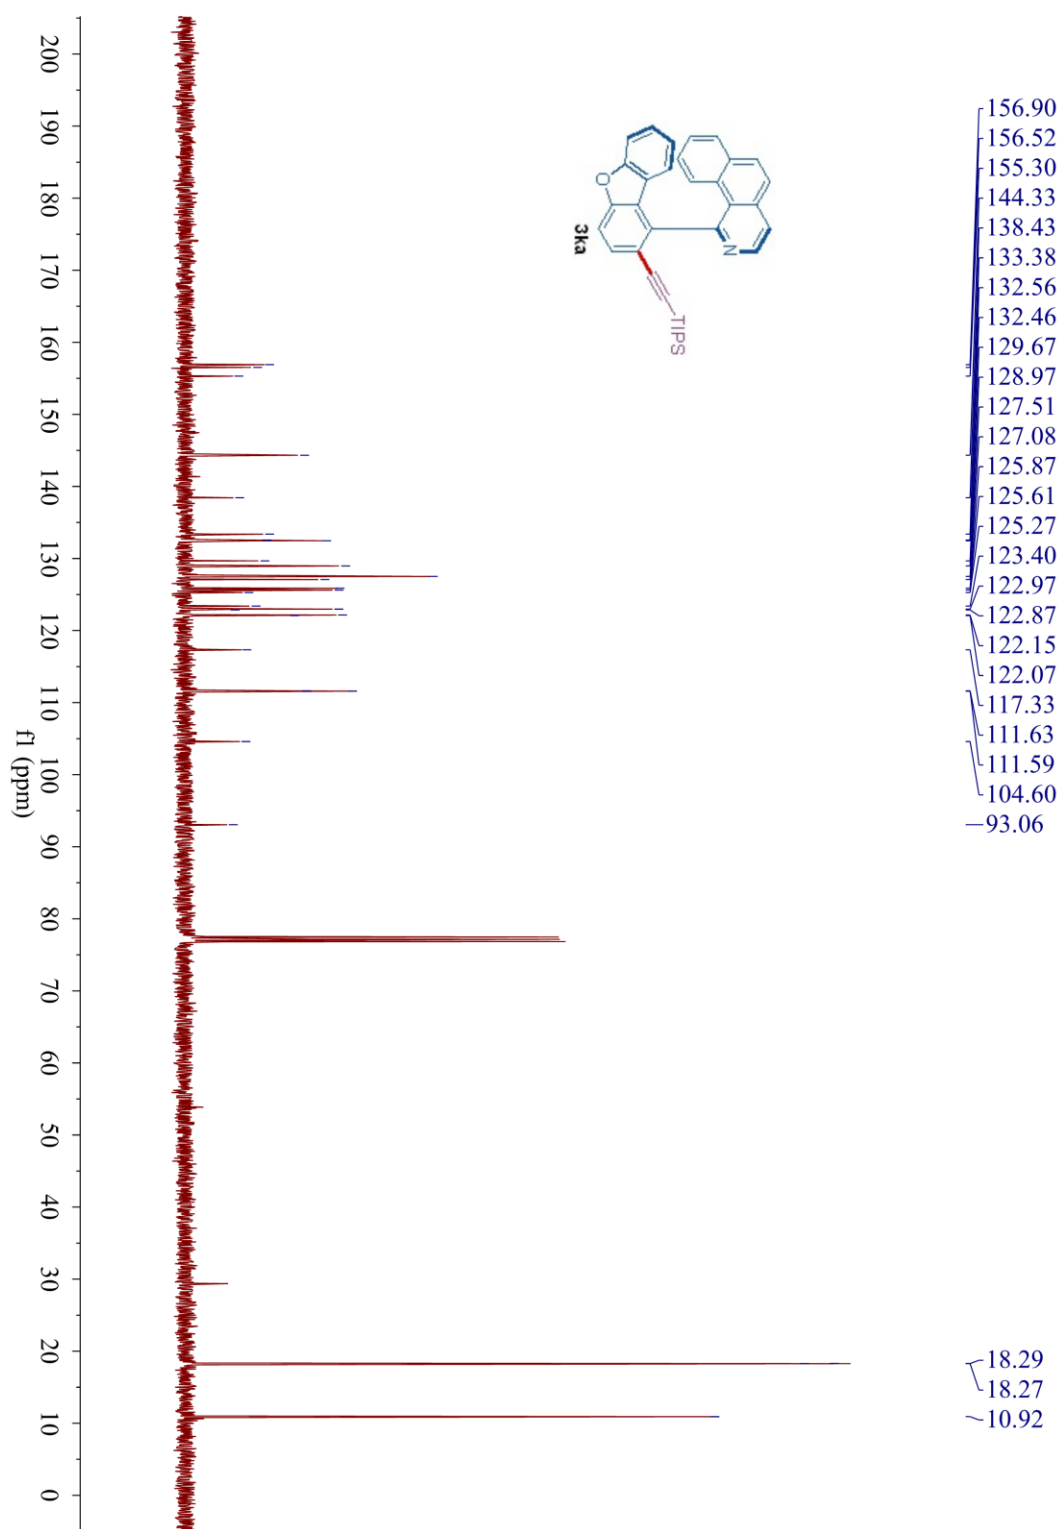

<sup>1</sup>H NMR (400 MHz, CDCl<sub>3</sub>) of **31a**

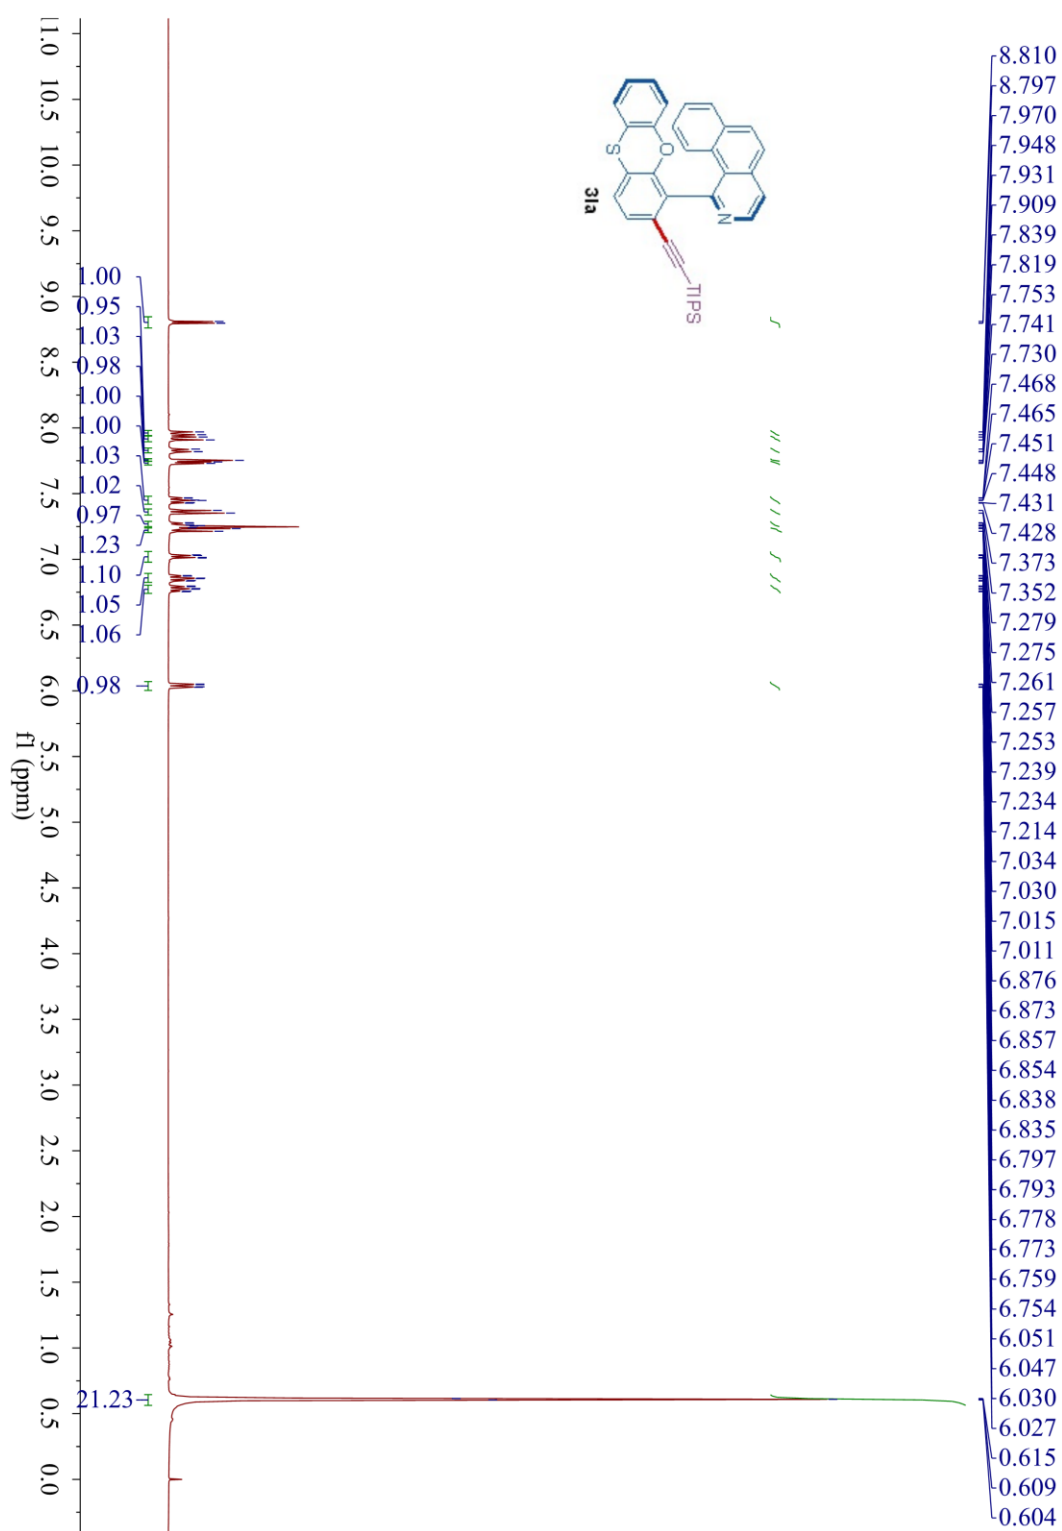

$^{13}\text{C}$  NMR (100 MHz,  $\text{CDCl}_3$ ) of **31a**

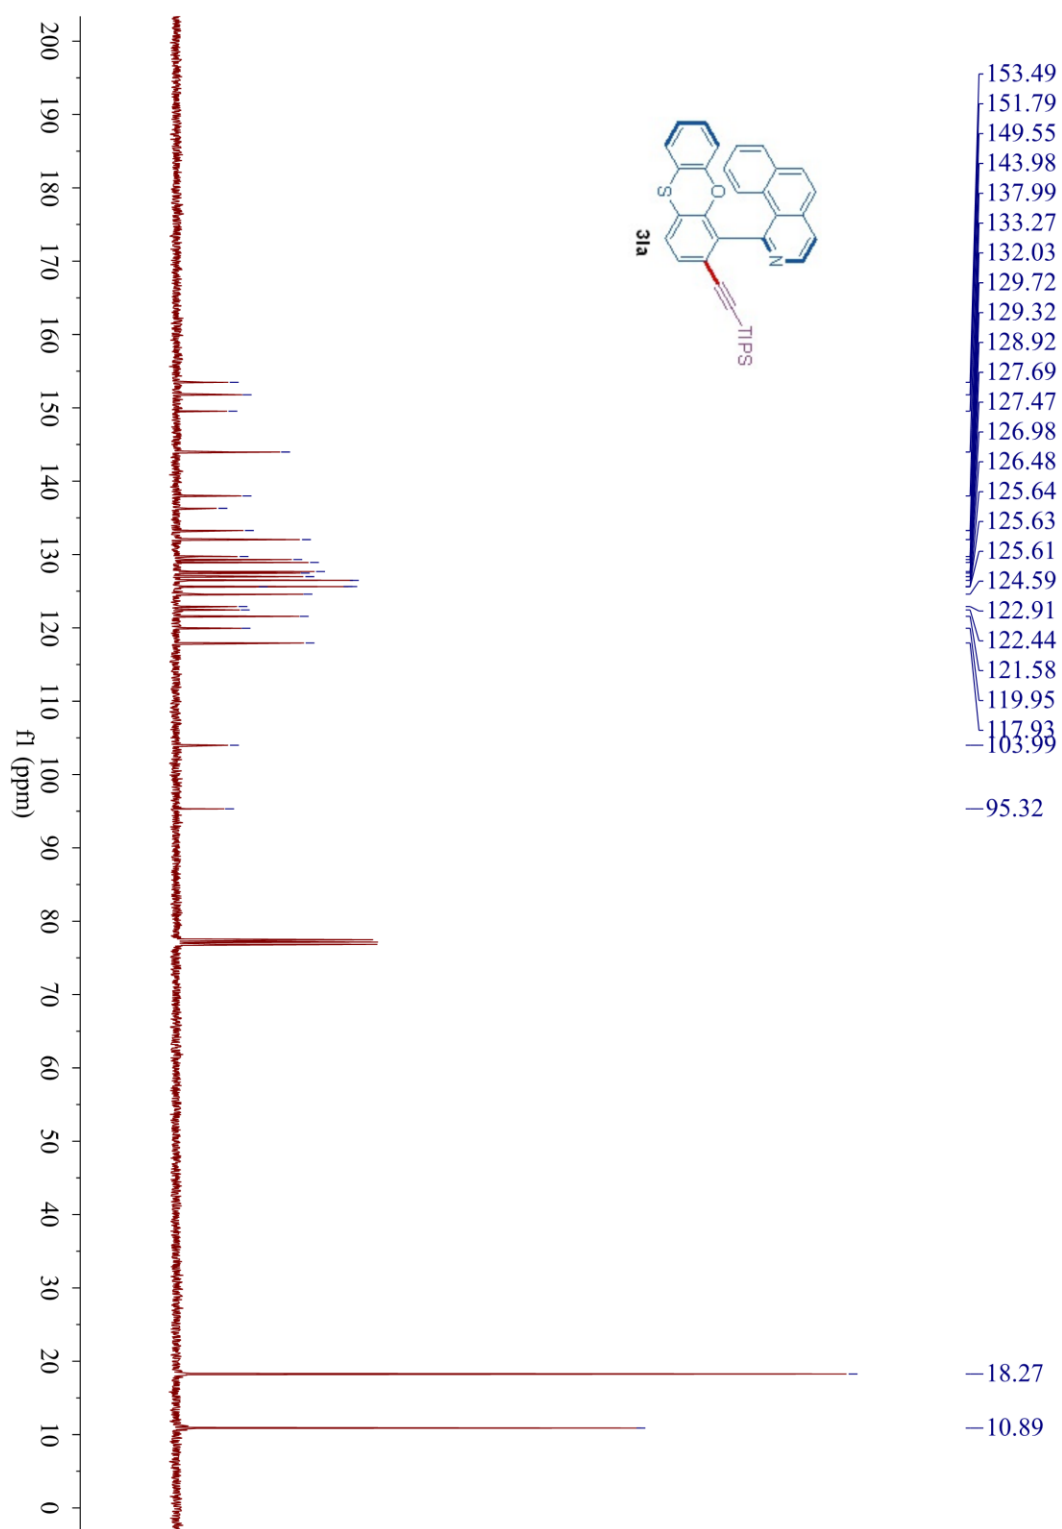

$^1\text{H}$  NMR (400 MHz,  $\text{CDCl}_3$ ) of **3ma**

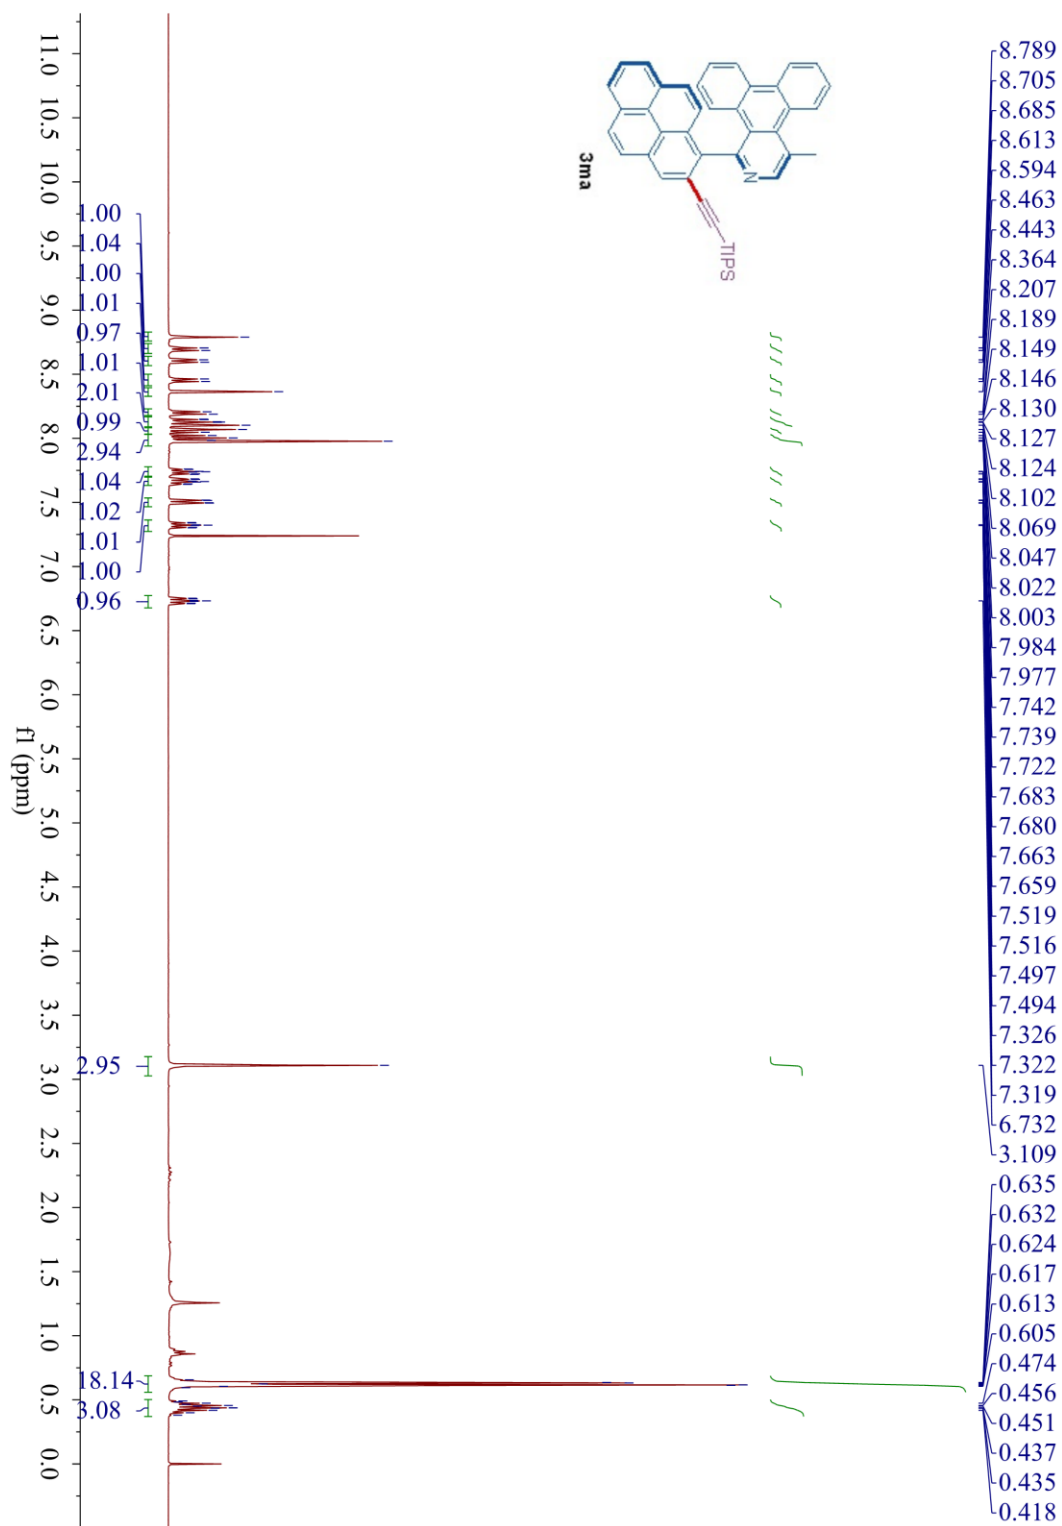

$^{13}\text{C}$  NMR (100 MHz,  $\text{CDCl}_3$ ) of **3ma**

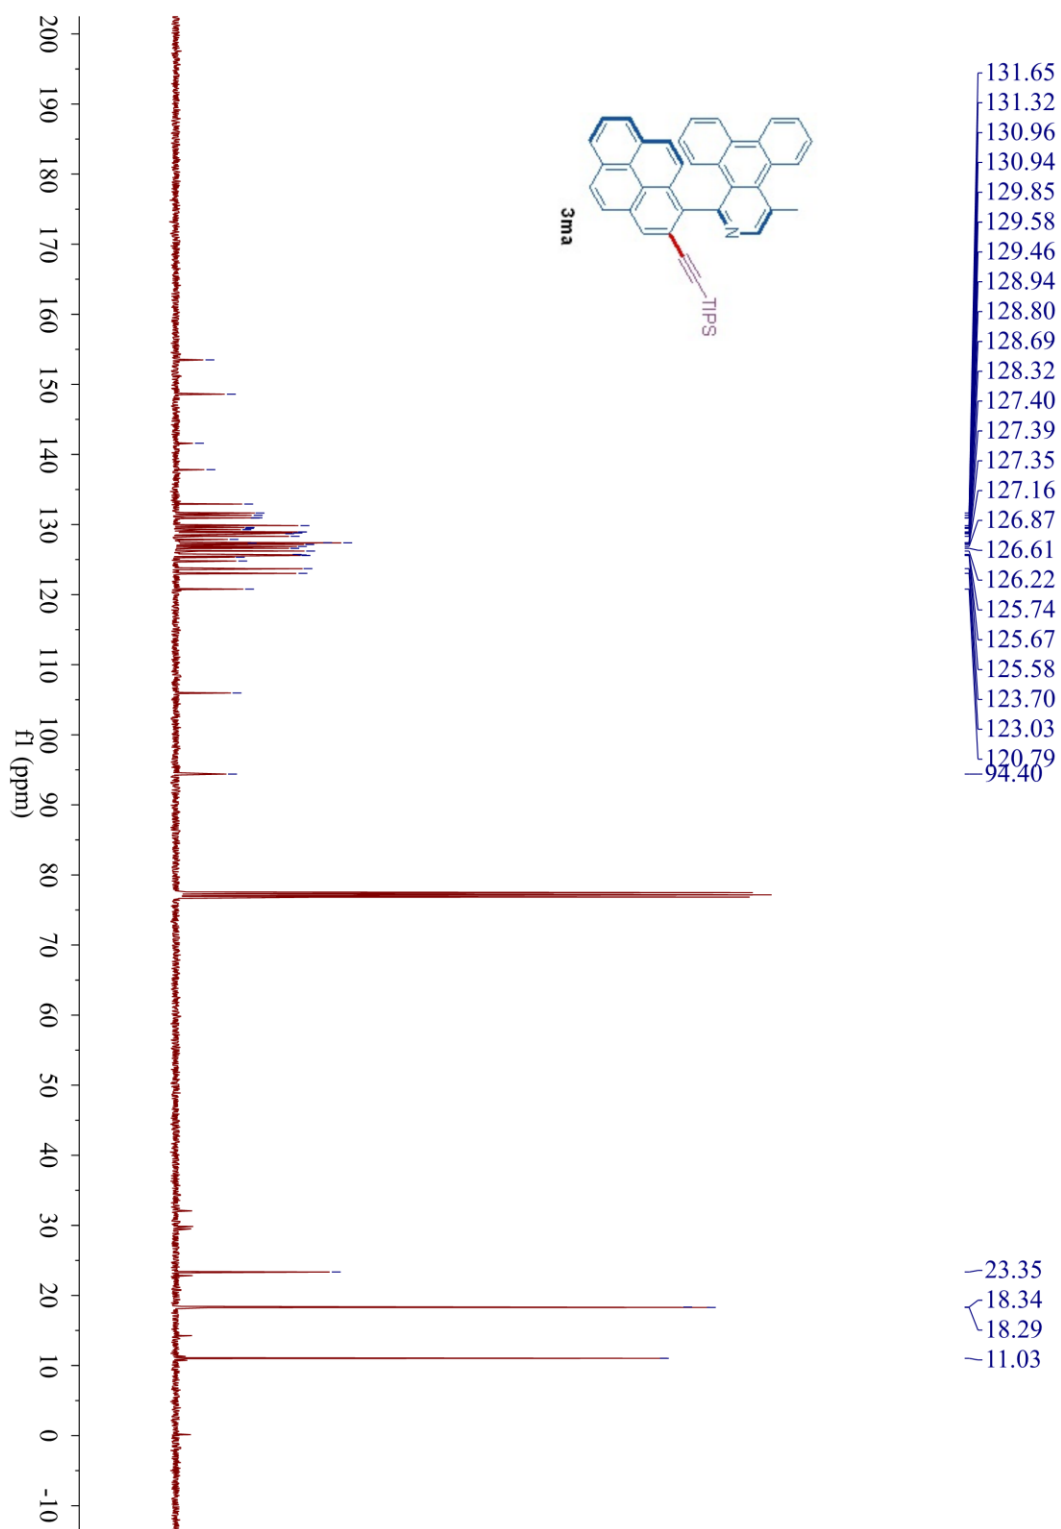

$^1\text{H}$  NMR (400 MHz,  $\text{CDCl}_3$ ) of **3na**

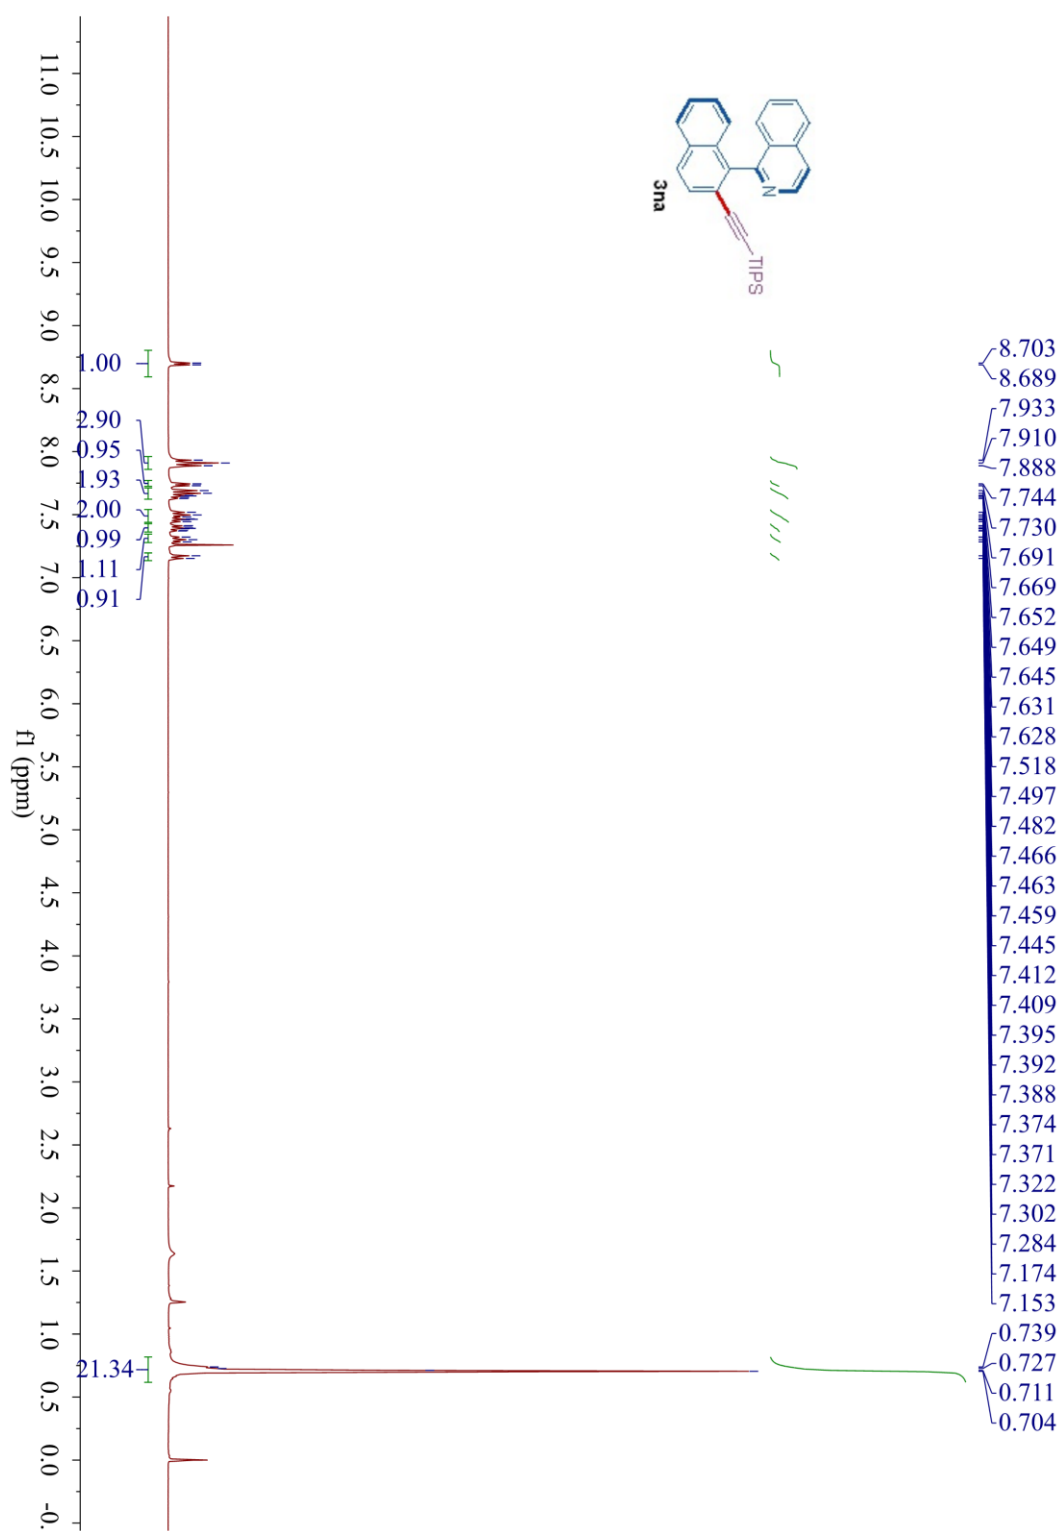



$^{13}\text{C}$  NMR (100 MHz,  $\text{CDCl}_3$ ) of **3na**

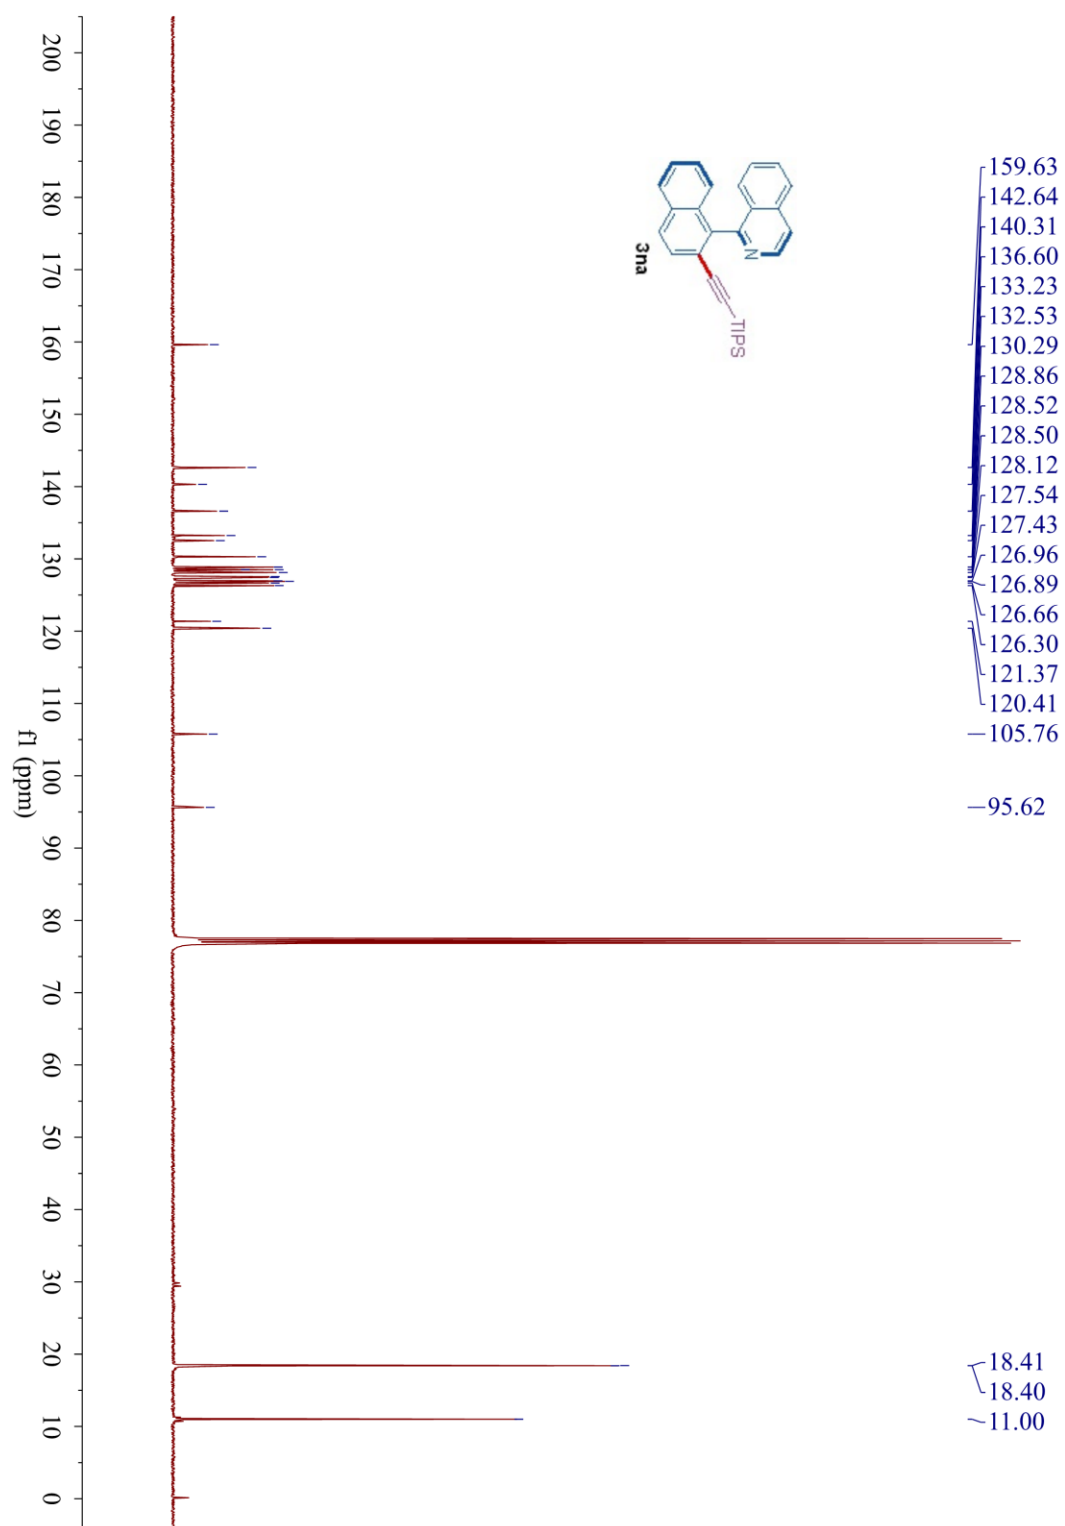

$^1\text{H}$  NMR (400 MHz,  $\text{CDCl}_3$ ) of **3oa**

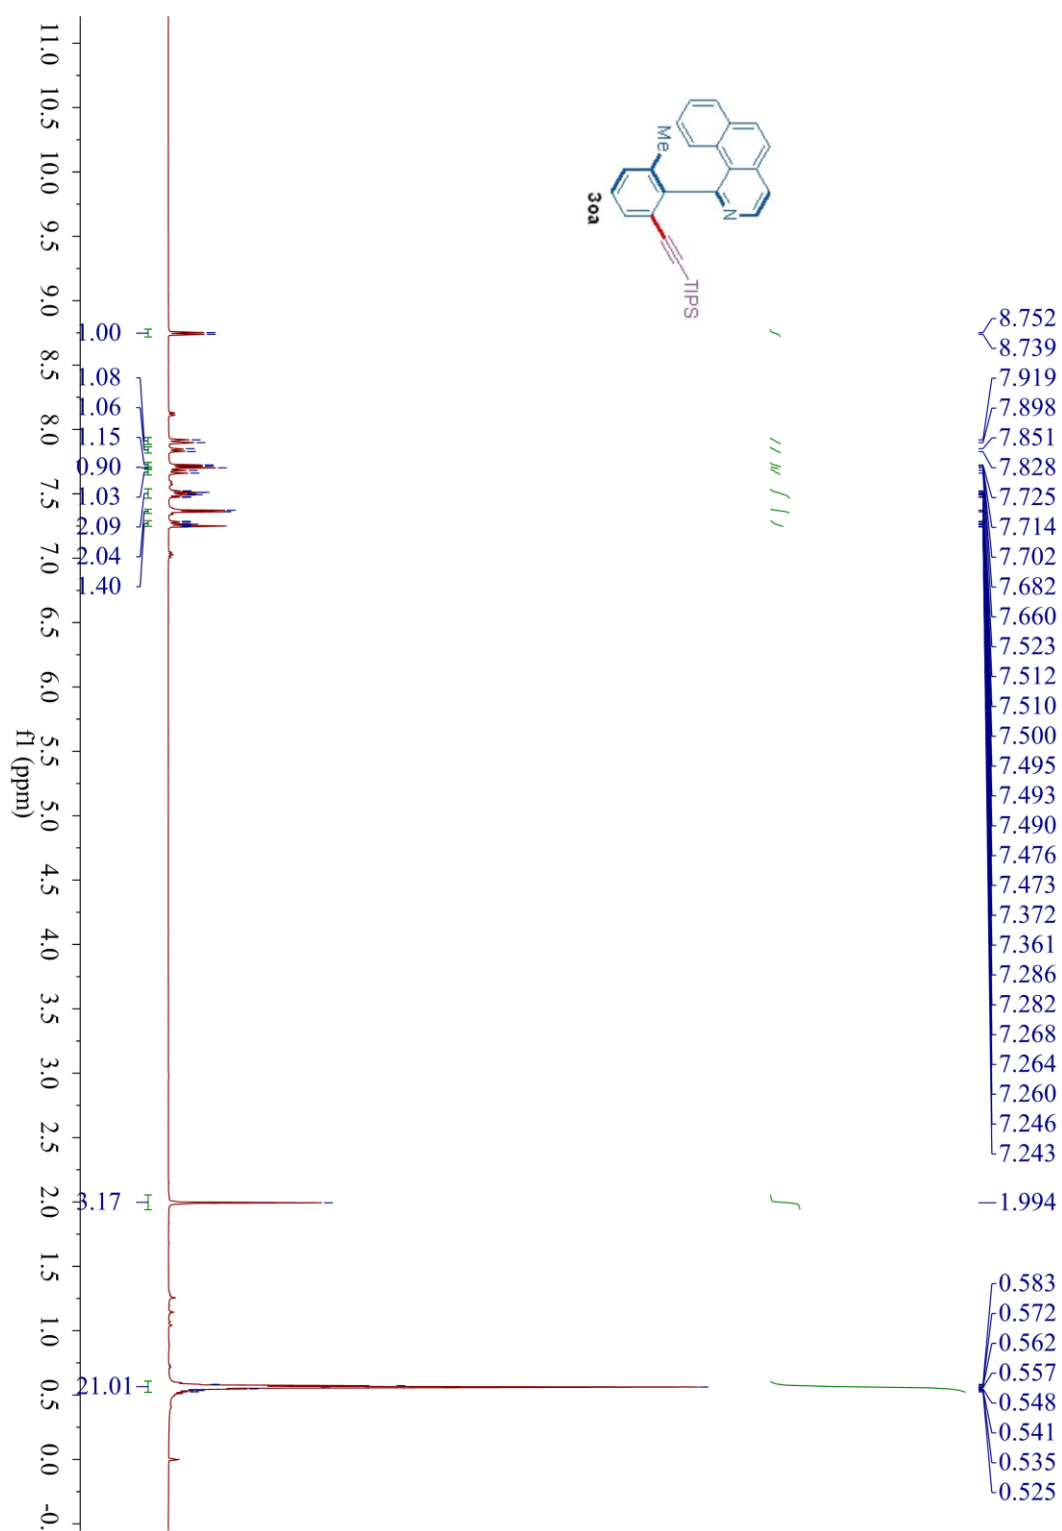

$^{13}\text{C}$  NMR (100 MHz,  $\text{CDCl}_3$ ) of **30a**

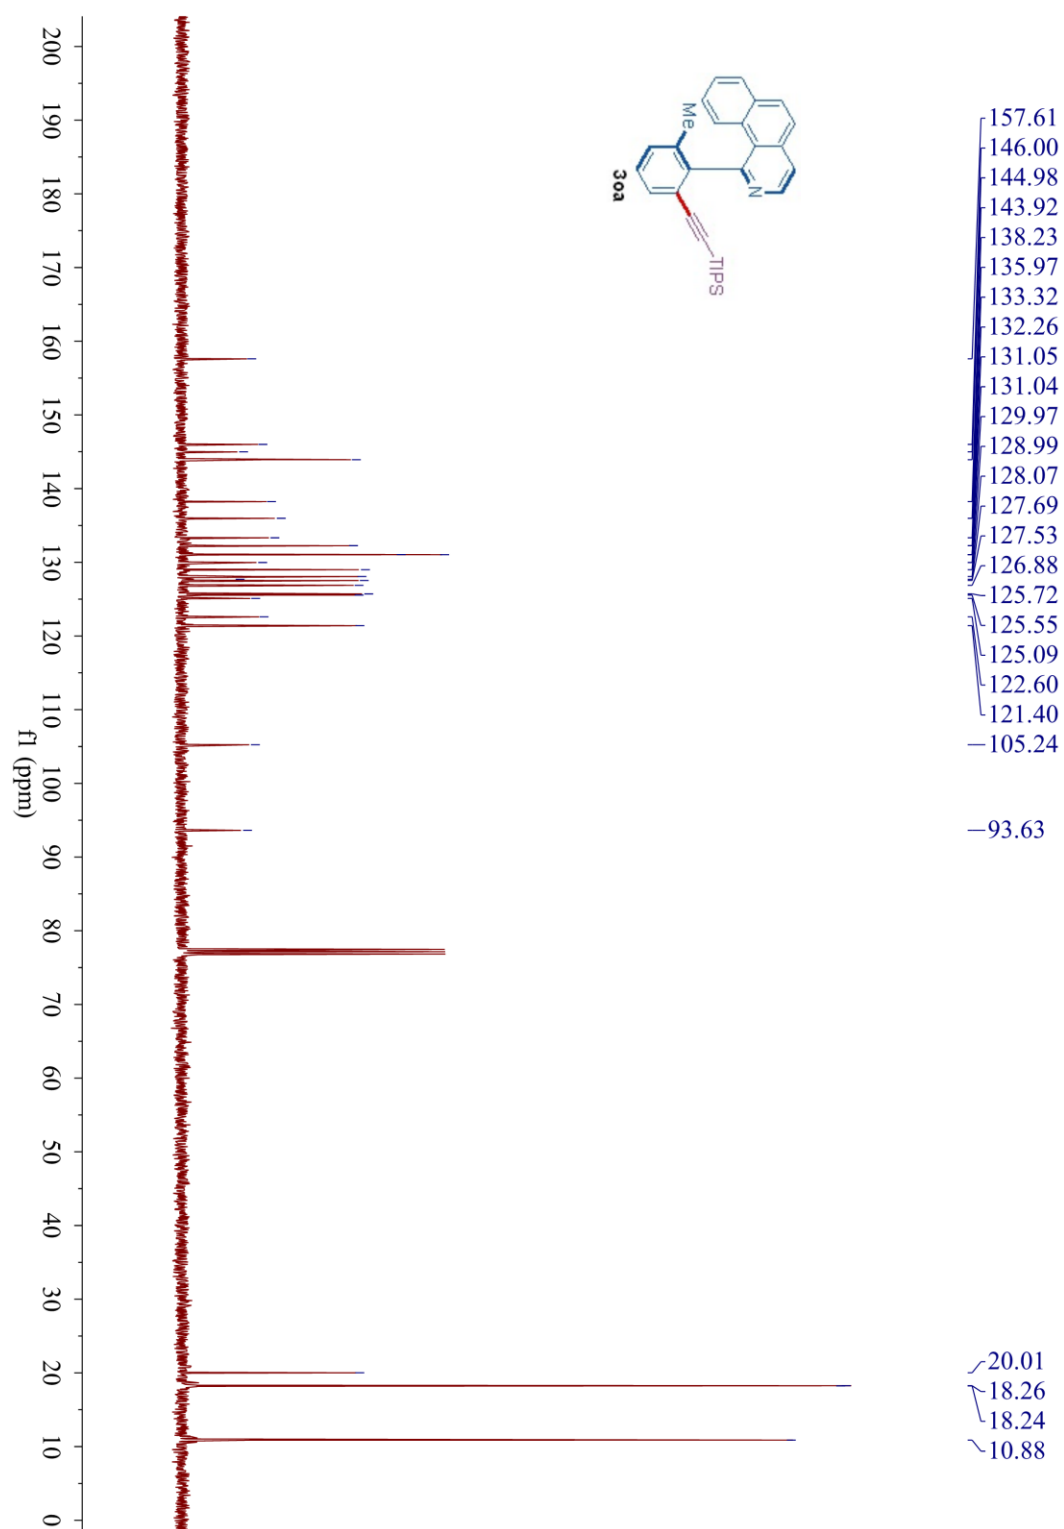

<sup>1</sup>H NMR (400 MHz, CDCl<sub>3</sub>) of **3pa**

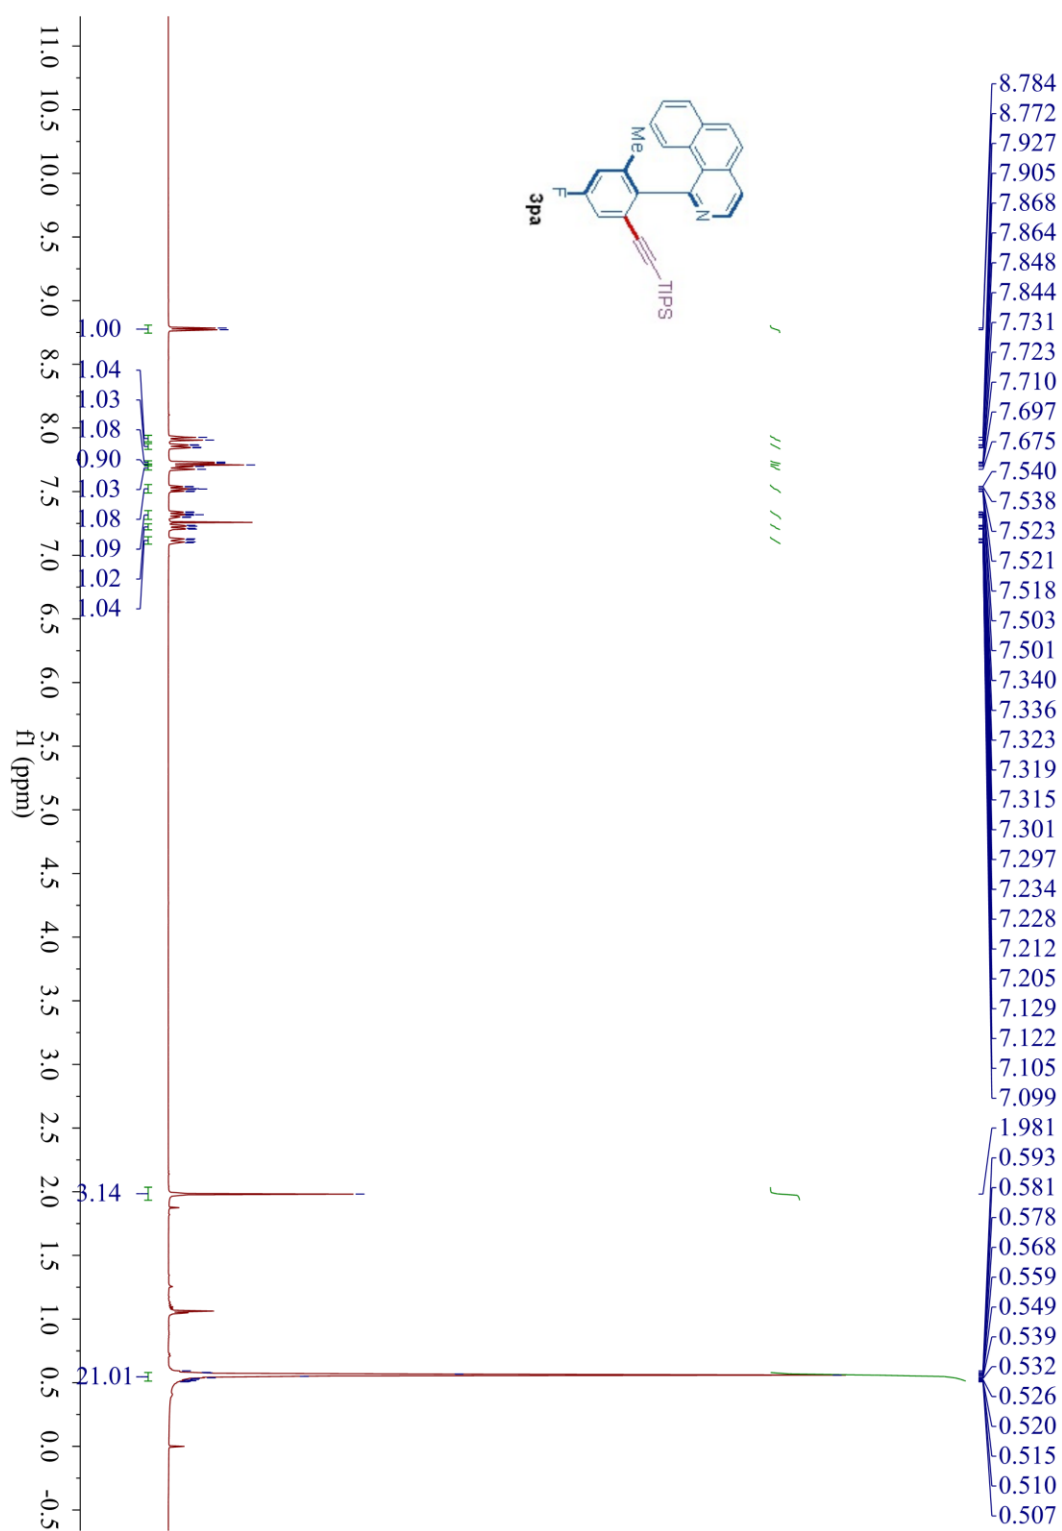

$^{13}\text{C}$  NMR (100 MHz,  $\text{CDCl}_3$ ) of **3pa**

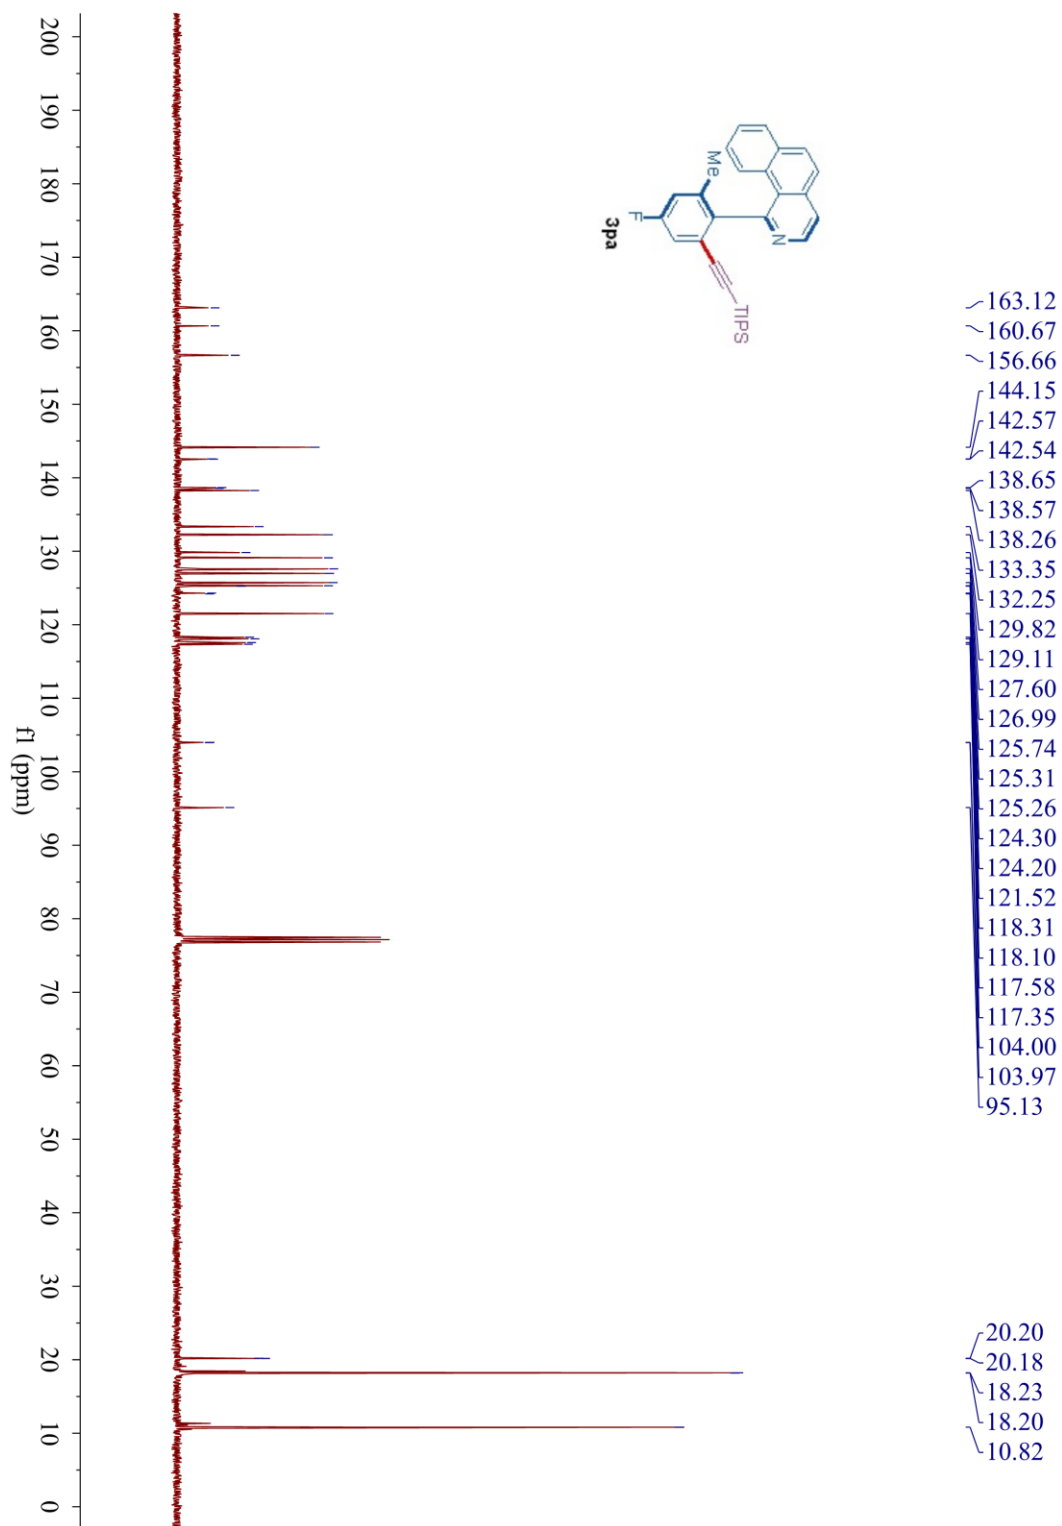

$^{19}\text{F}$  NMR (376 MHz,  $\text{CDCl}_3$ ) of **3pa**

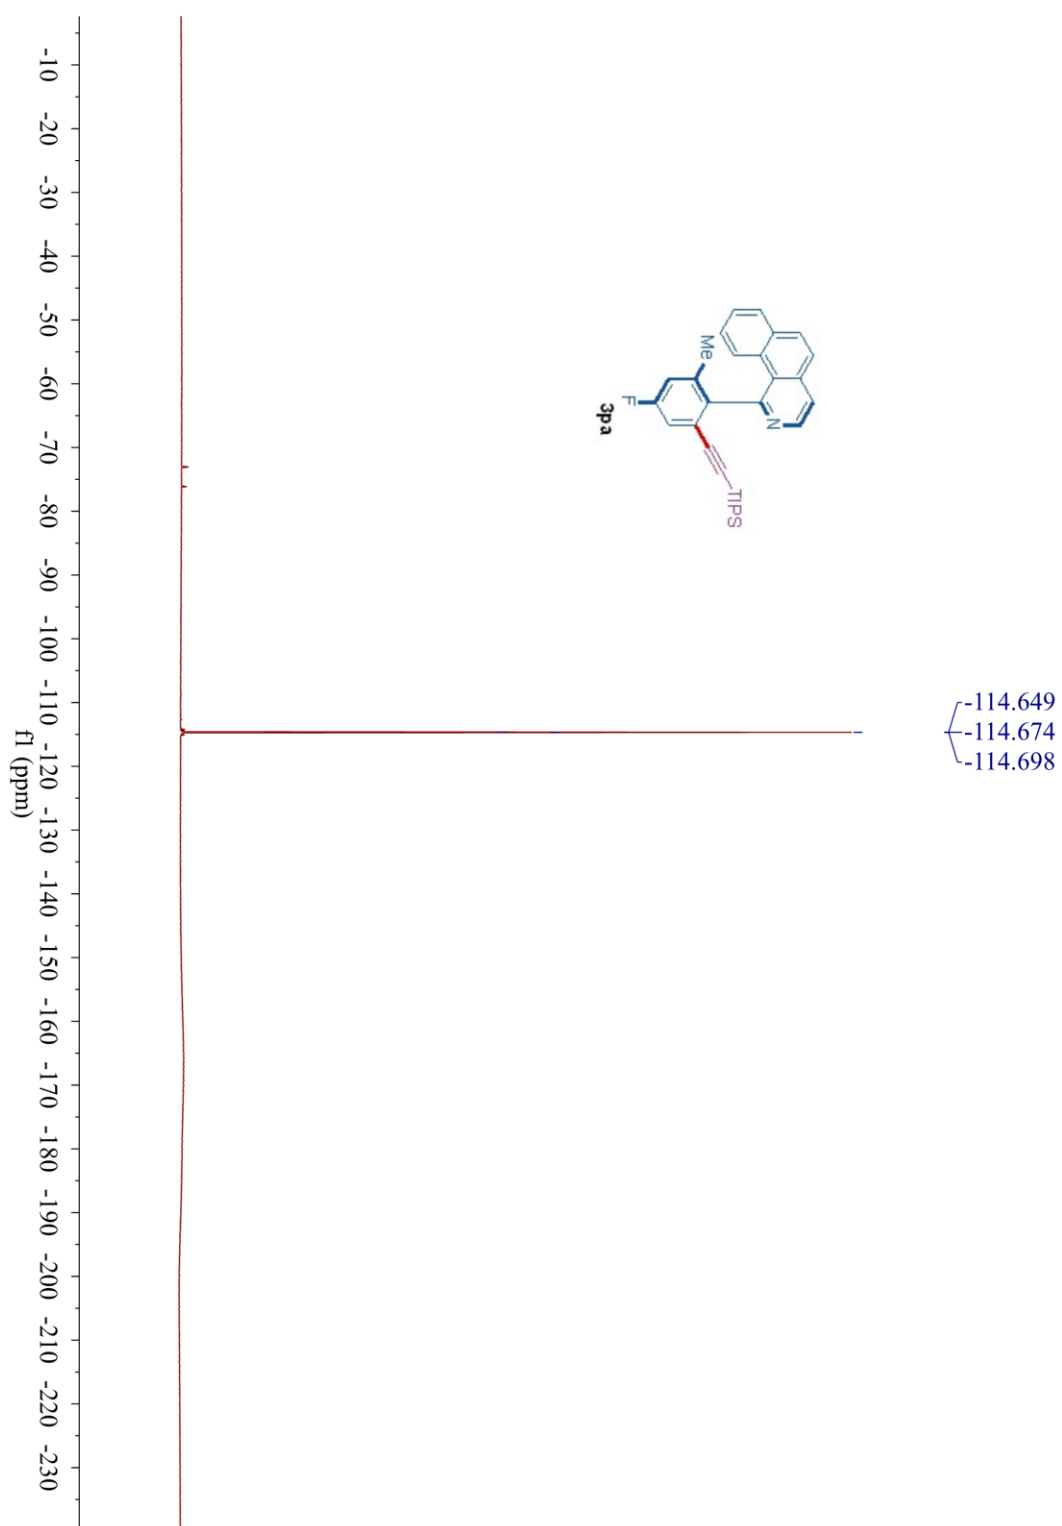

<sup>1</sup>H NMR (400 MHz, CDCl<sub>3</sub>) of **3qa**

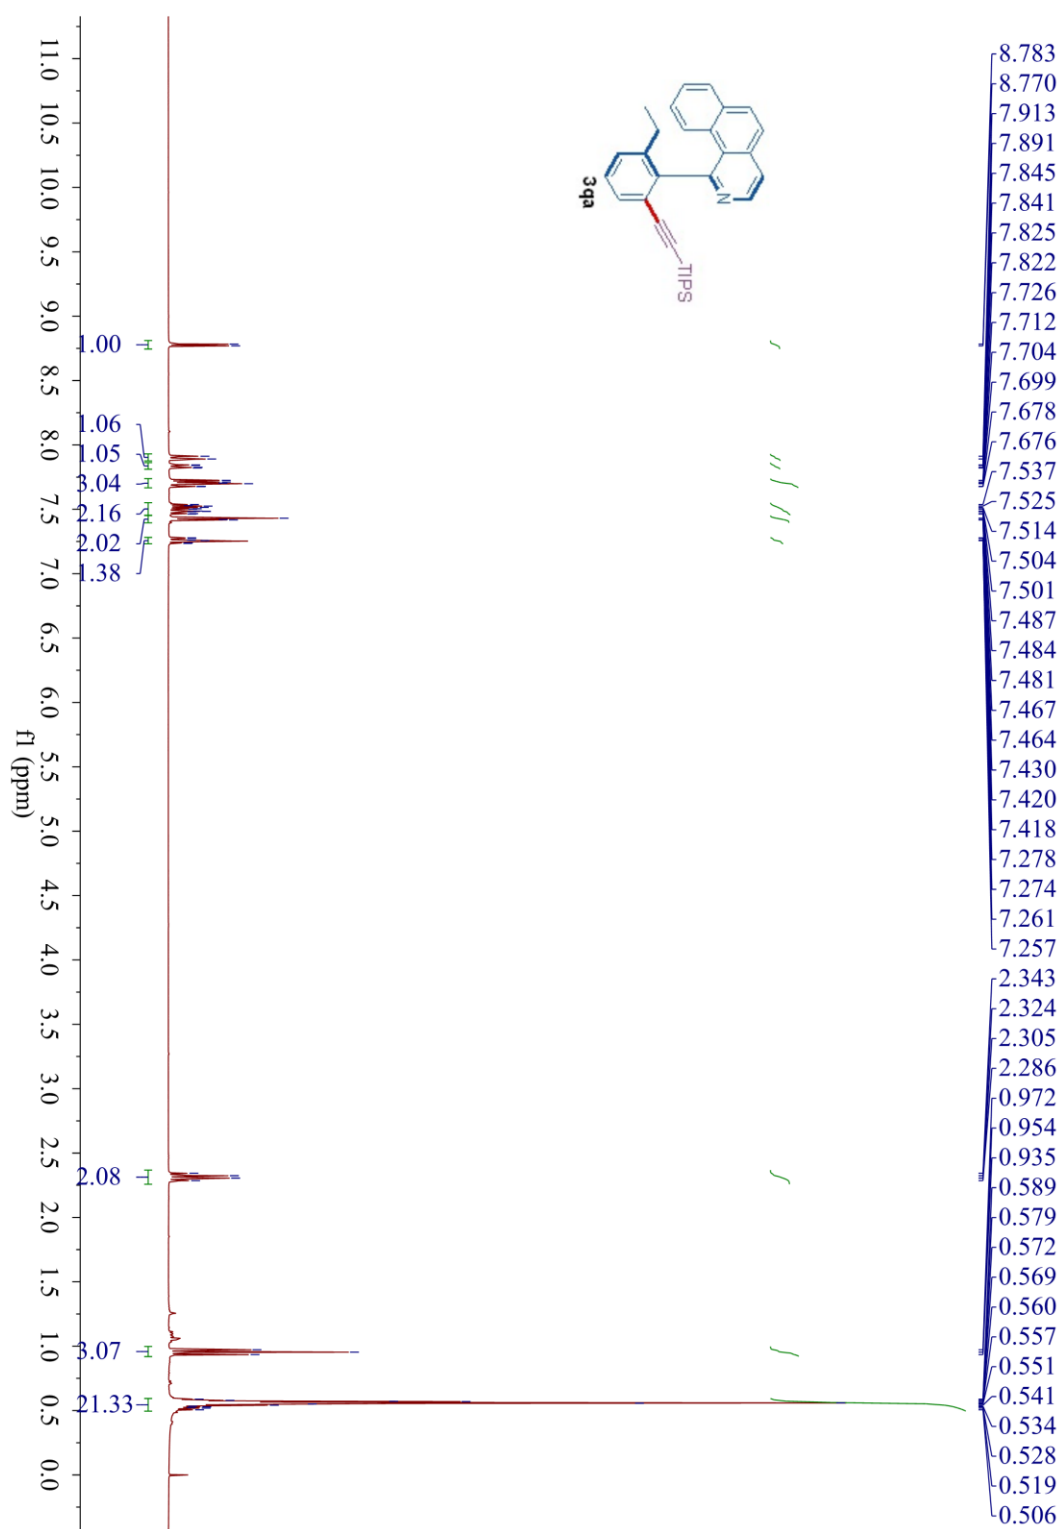

<sup>13</sup>C NMR (100 MHz, CDCl<sub>3</sub>) of **3qa**

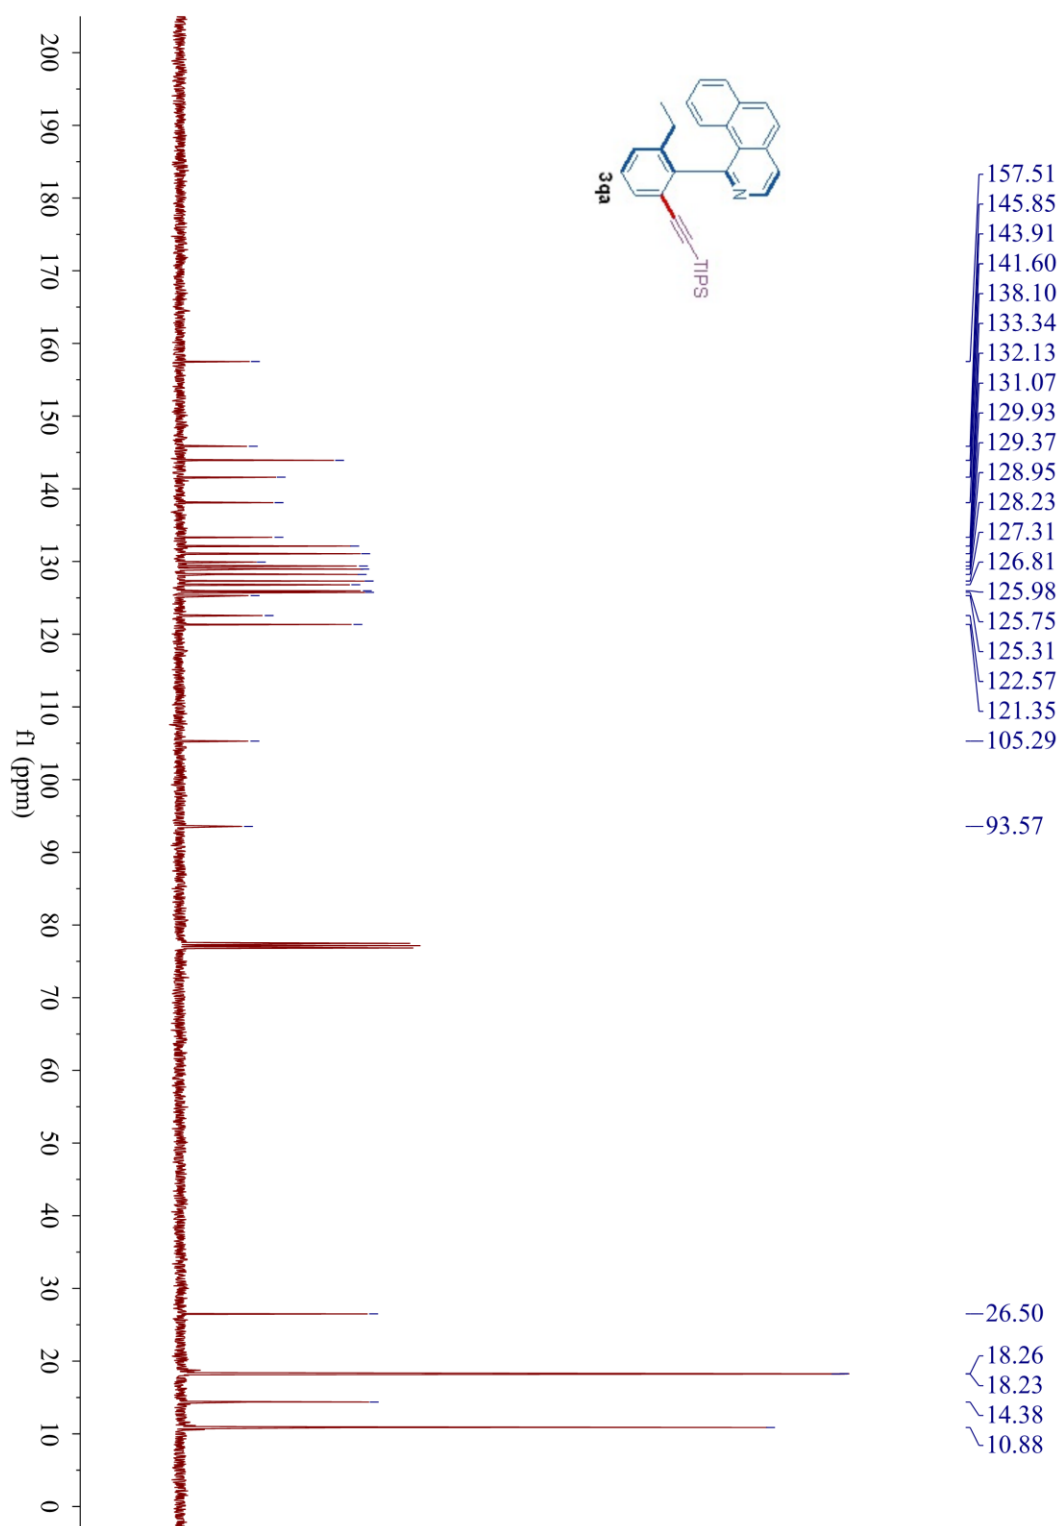



$^1\text{H}$  NMR (400 MHz,  $\text{CDCl}_3$ ) of **3ra**

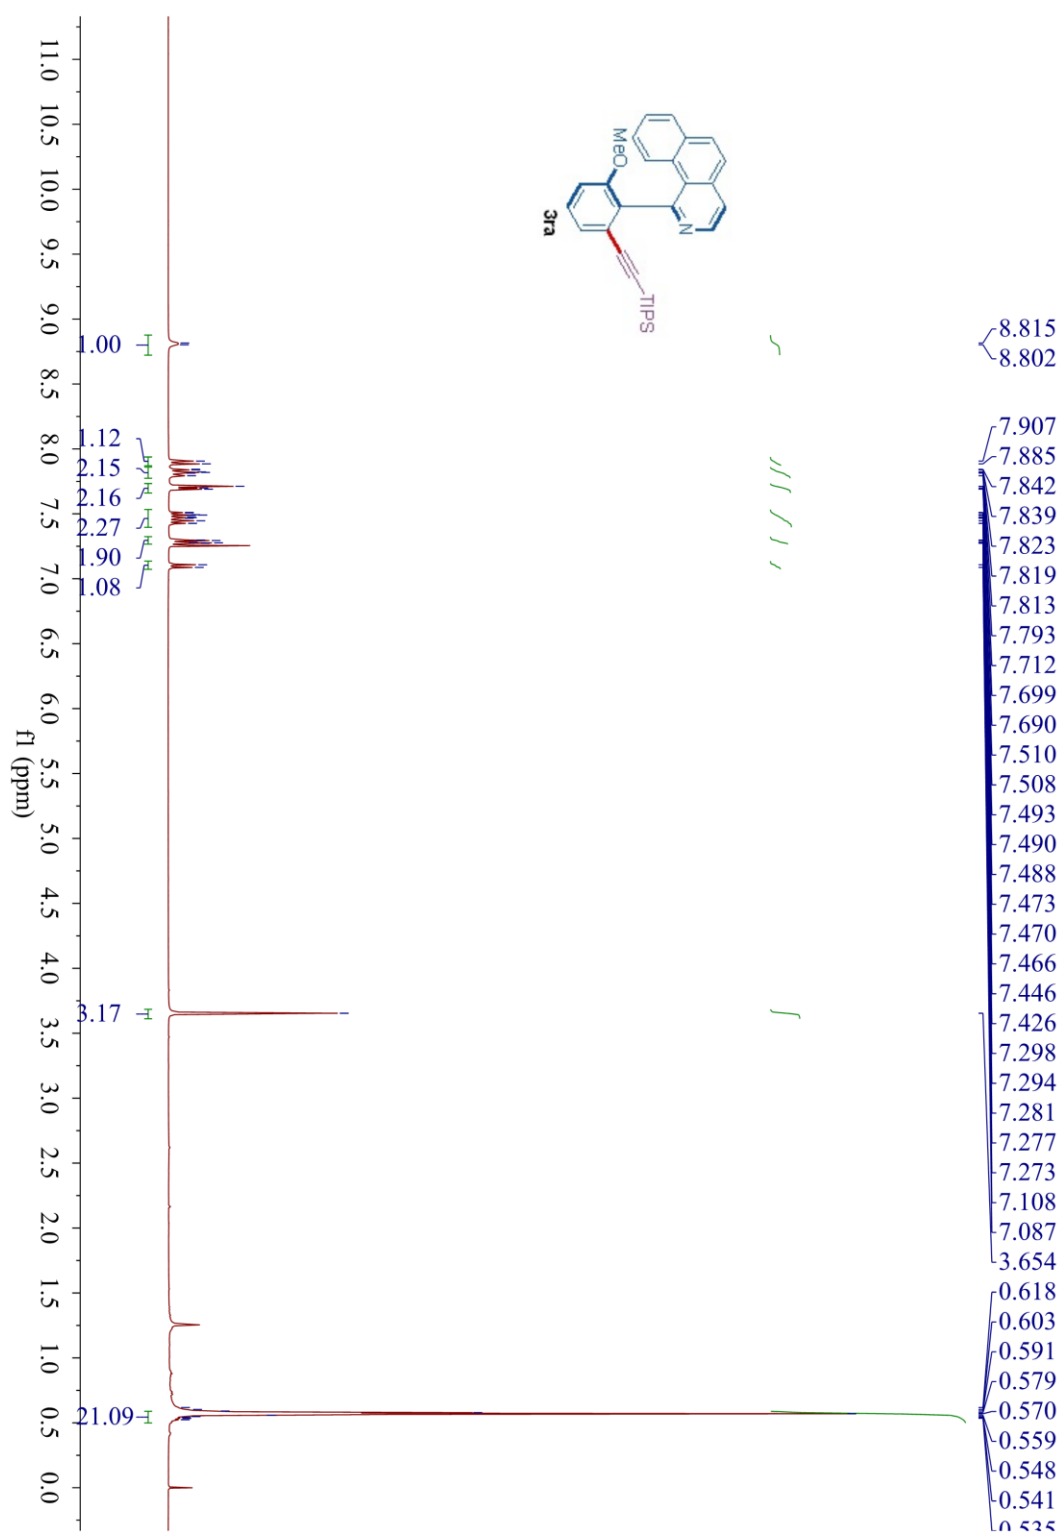

$^{13}\text{C}$  NMR (100 MHz,  $\text{CDCl}_3$ ) of **3ra**

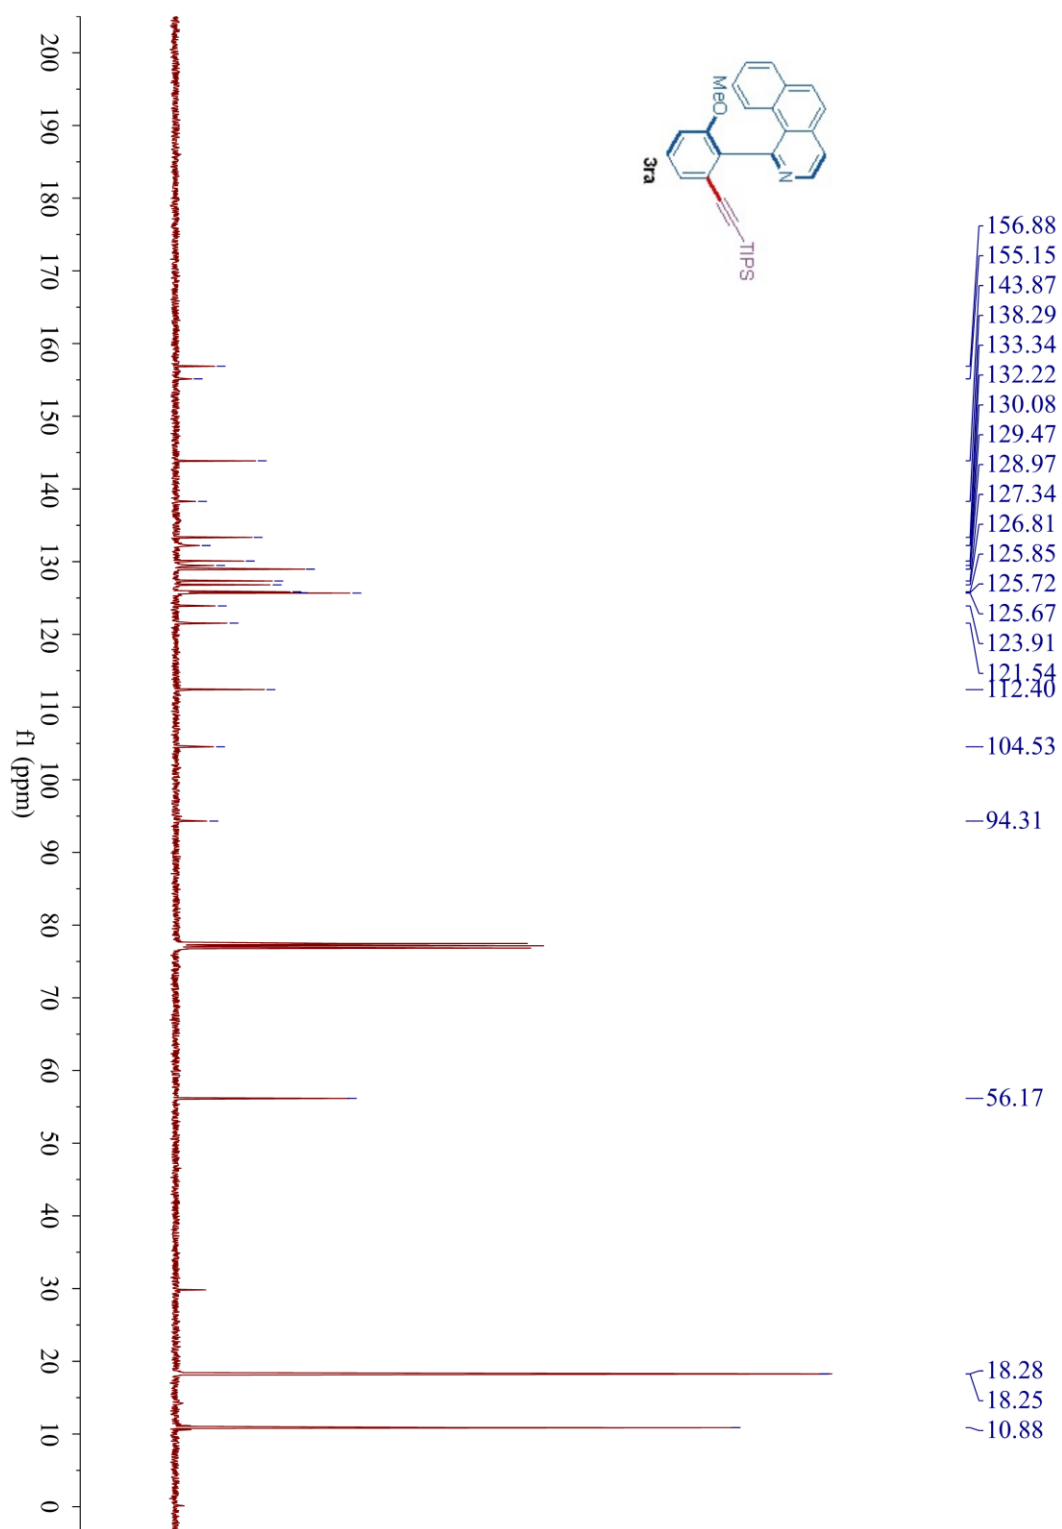

<sup>1</sup>H NMR (400 MHz, CDCl<sub>3</sub>) of **3sa**

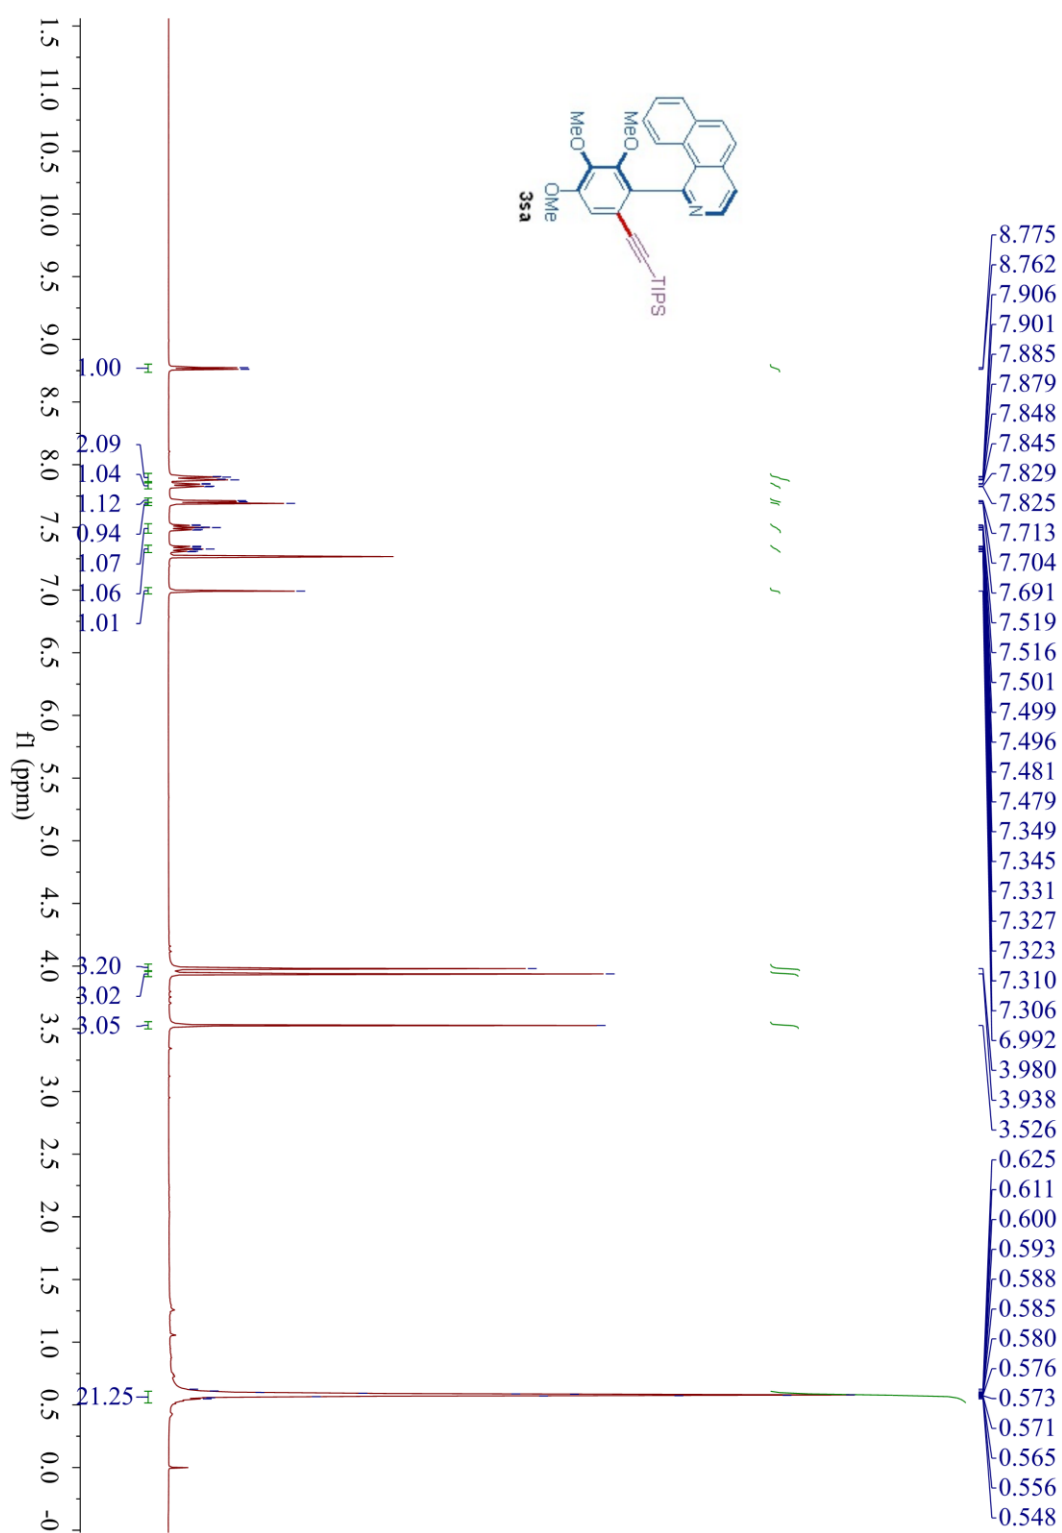

$^{13}\text{C}$  NMR (100 MHz,  $\text{CDCl}_3$ ) of **3sa**

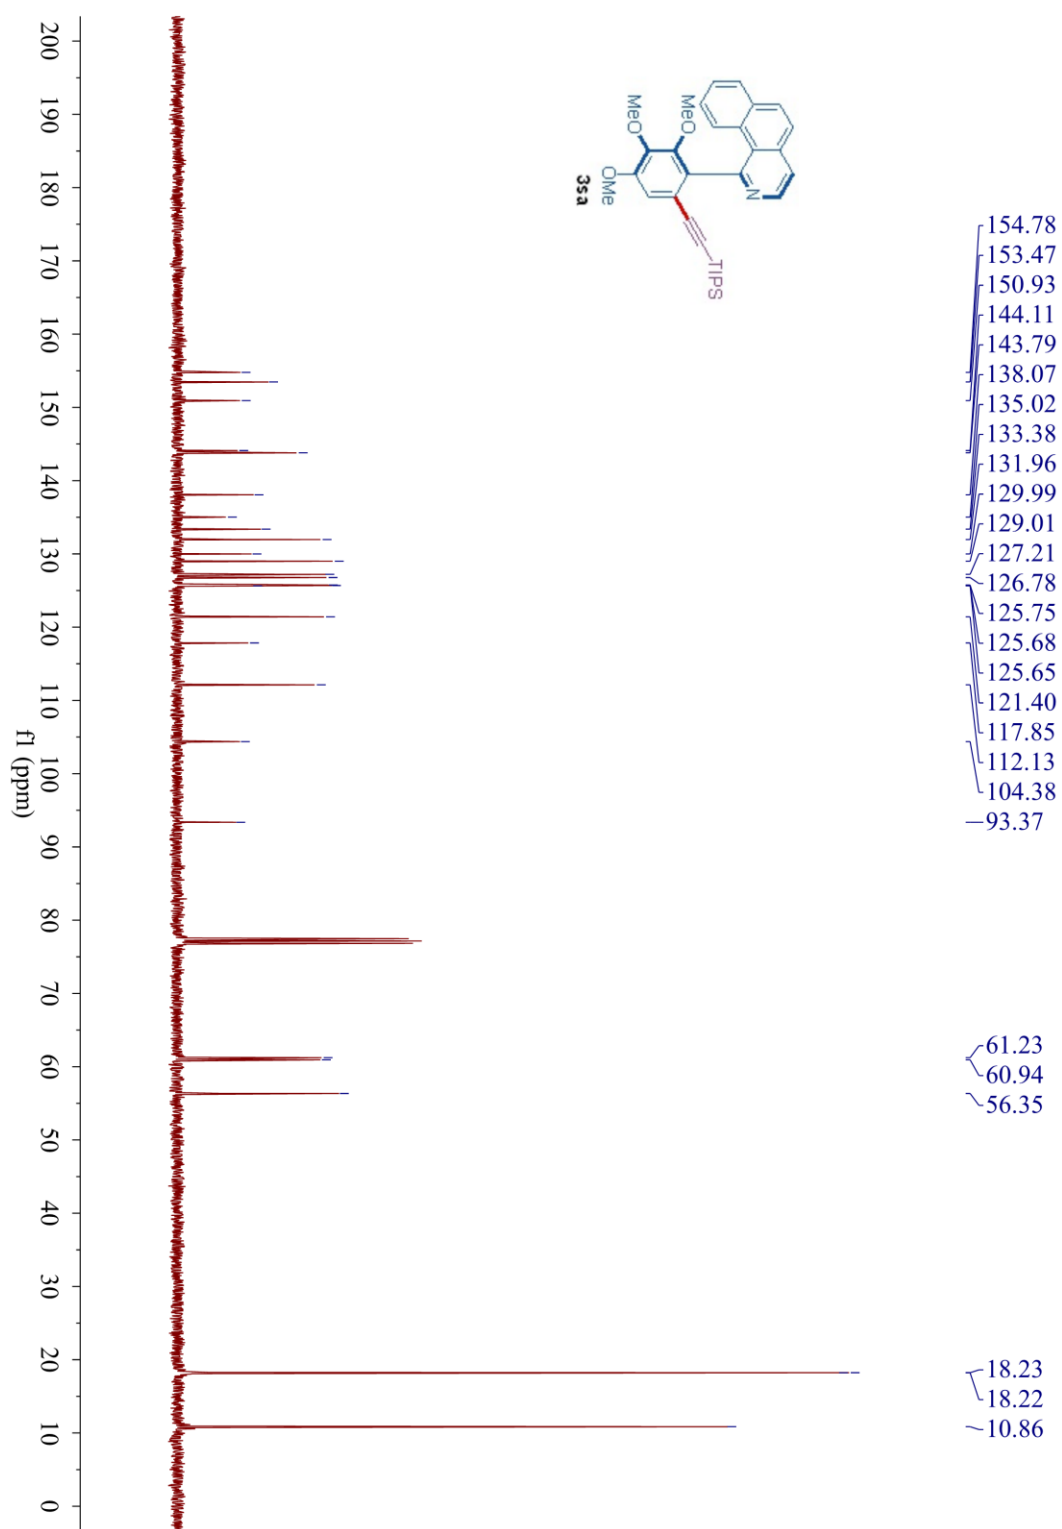

<sup>1</sup>H NMR (400 MHz, CDCl<sub>3</sub>) of **3ta**

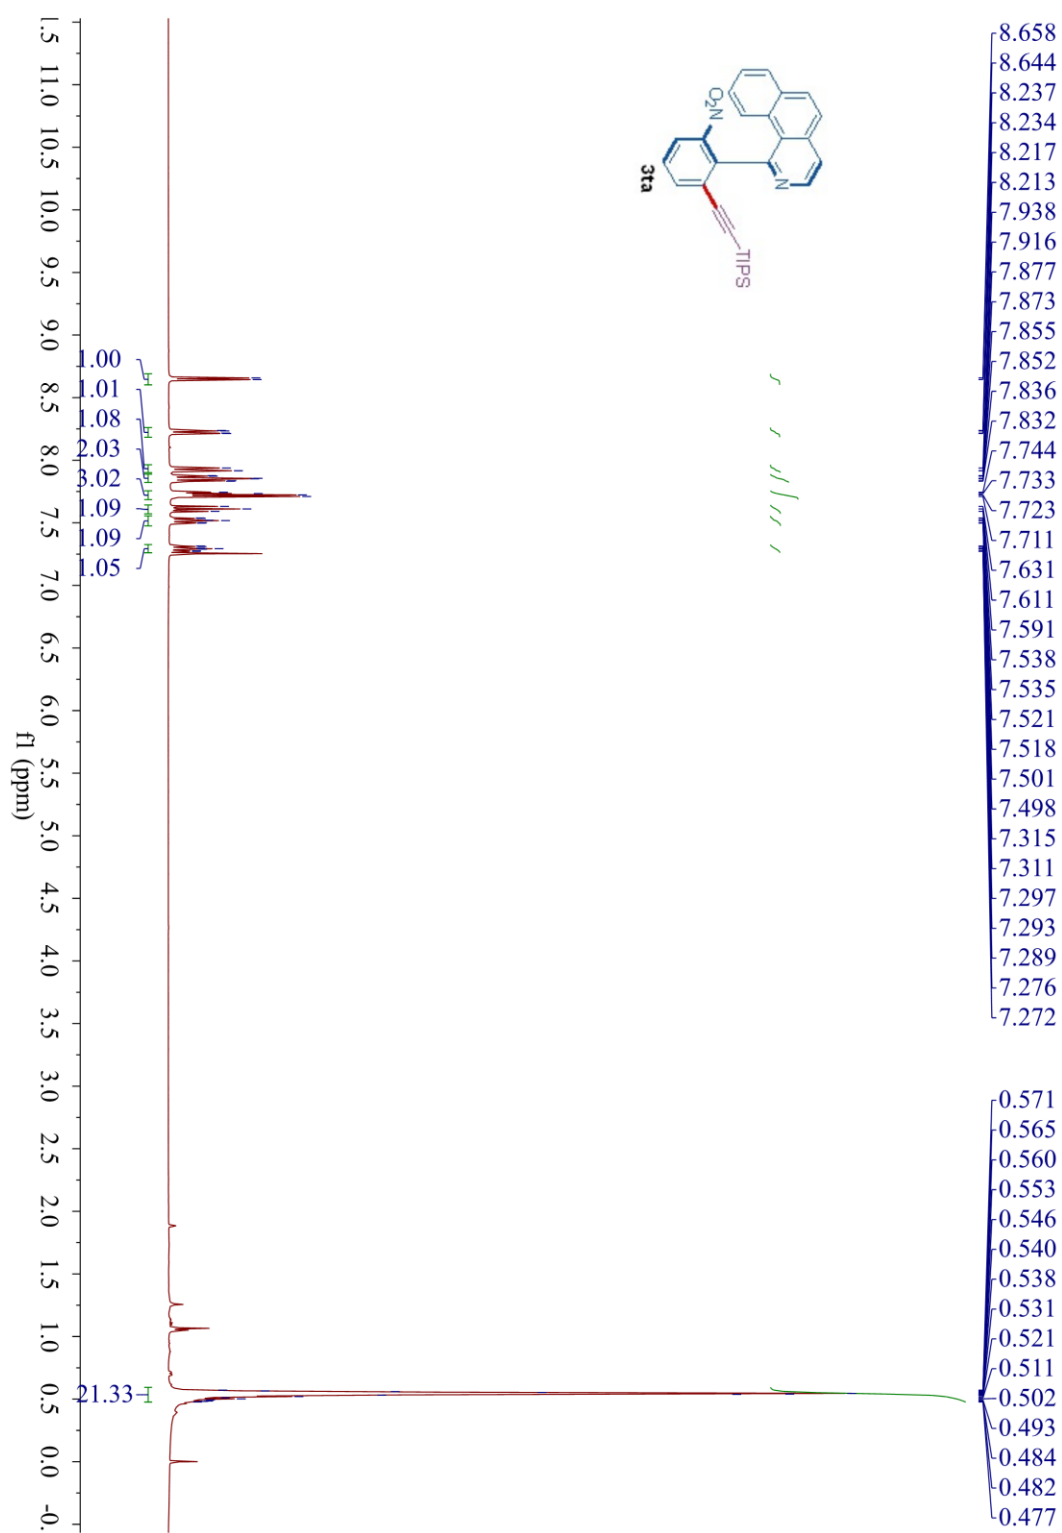

$^{13}\text{C}$  NMR (100 MHz,  $\text{CDCl}_3$ ) of **3ta**

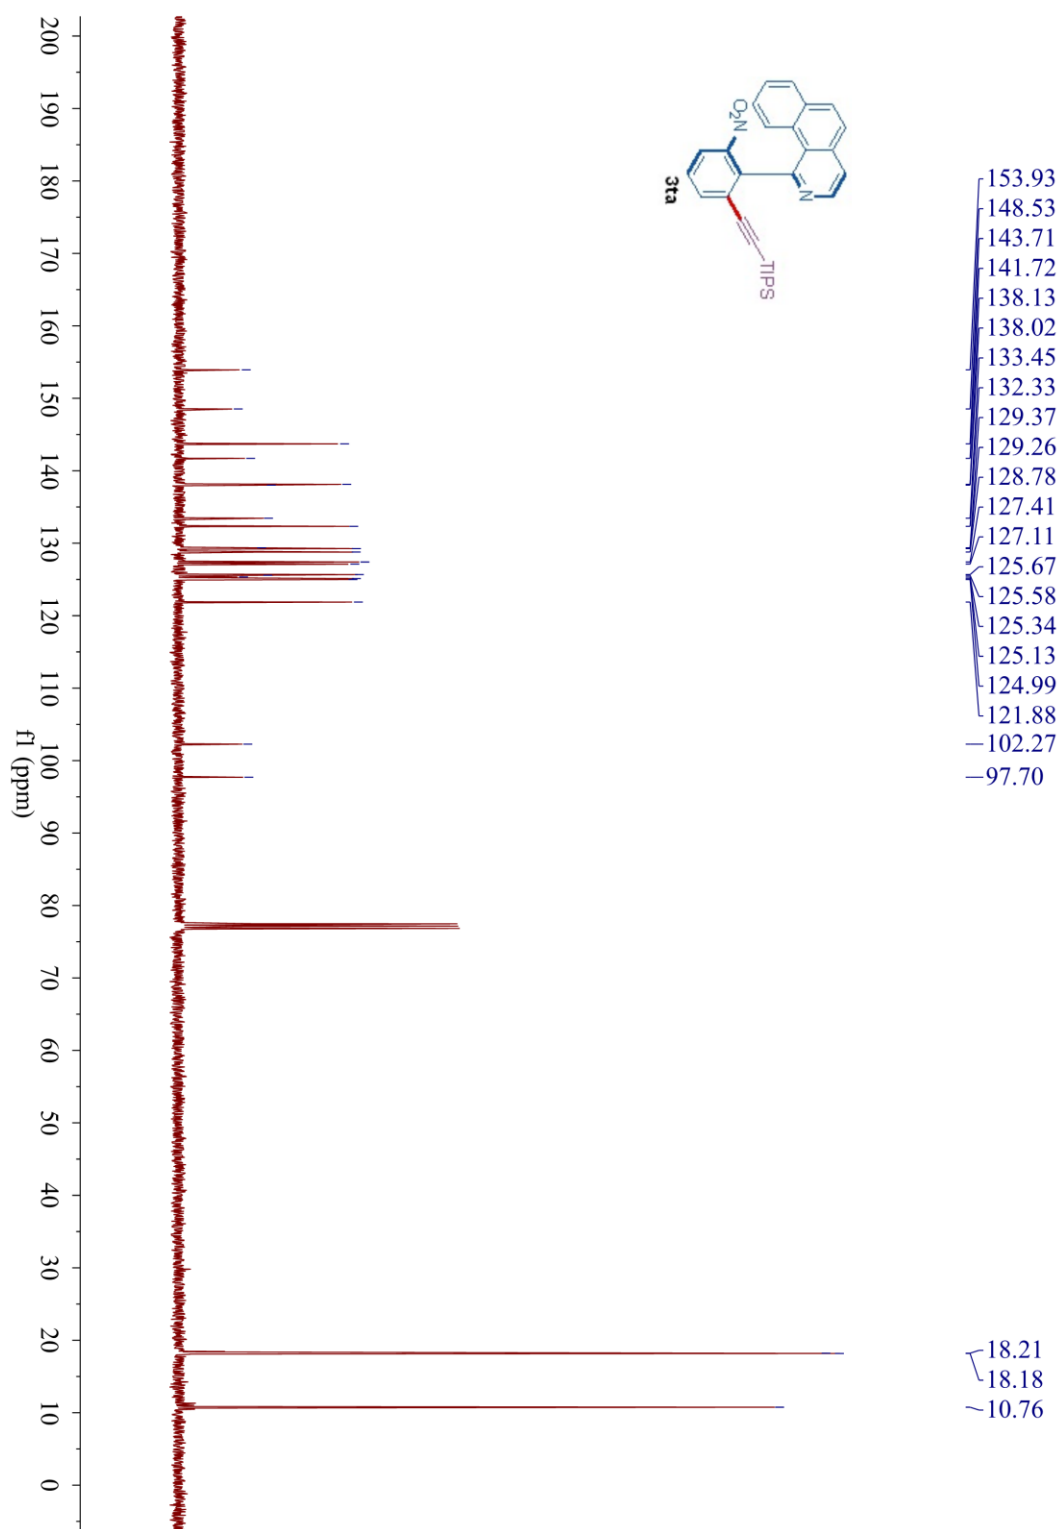

$^1\text{H}$  NMR (400 MHz,  $\text{CDCl}_3$ ) of **3ua**

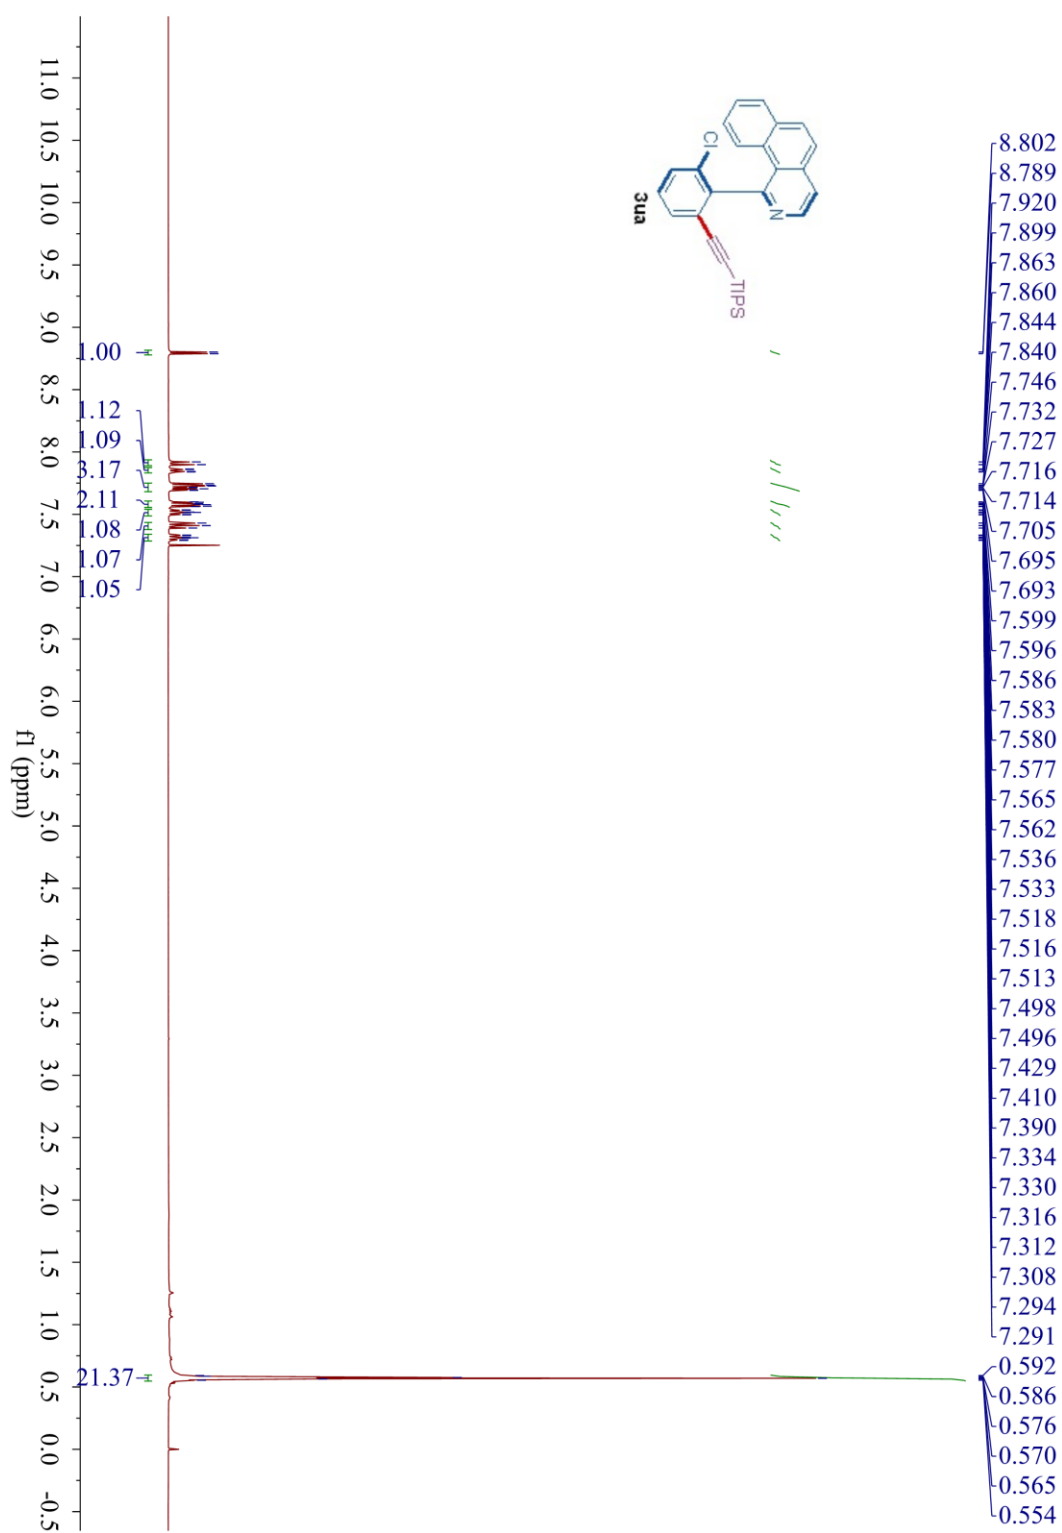

$^{13}\text{C}$  NMR (100 MHz,  $\text{CDCl}_3$ ) of **3ua**

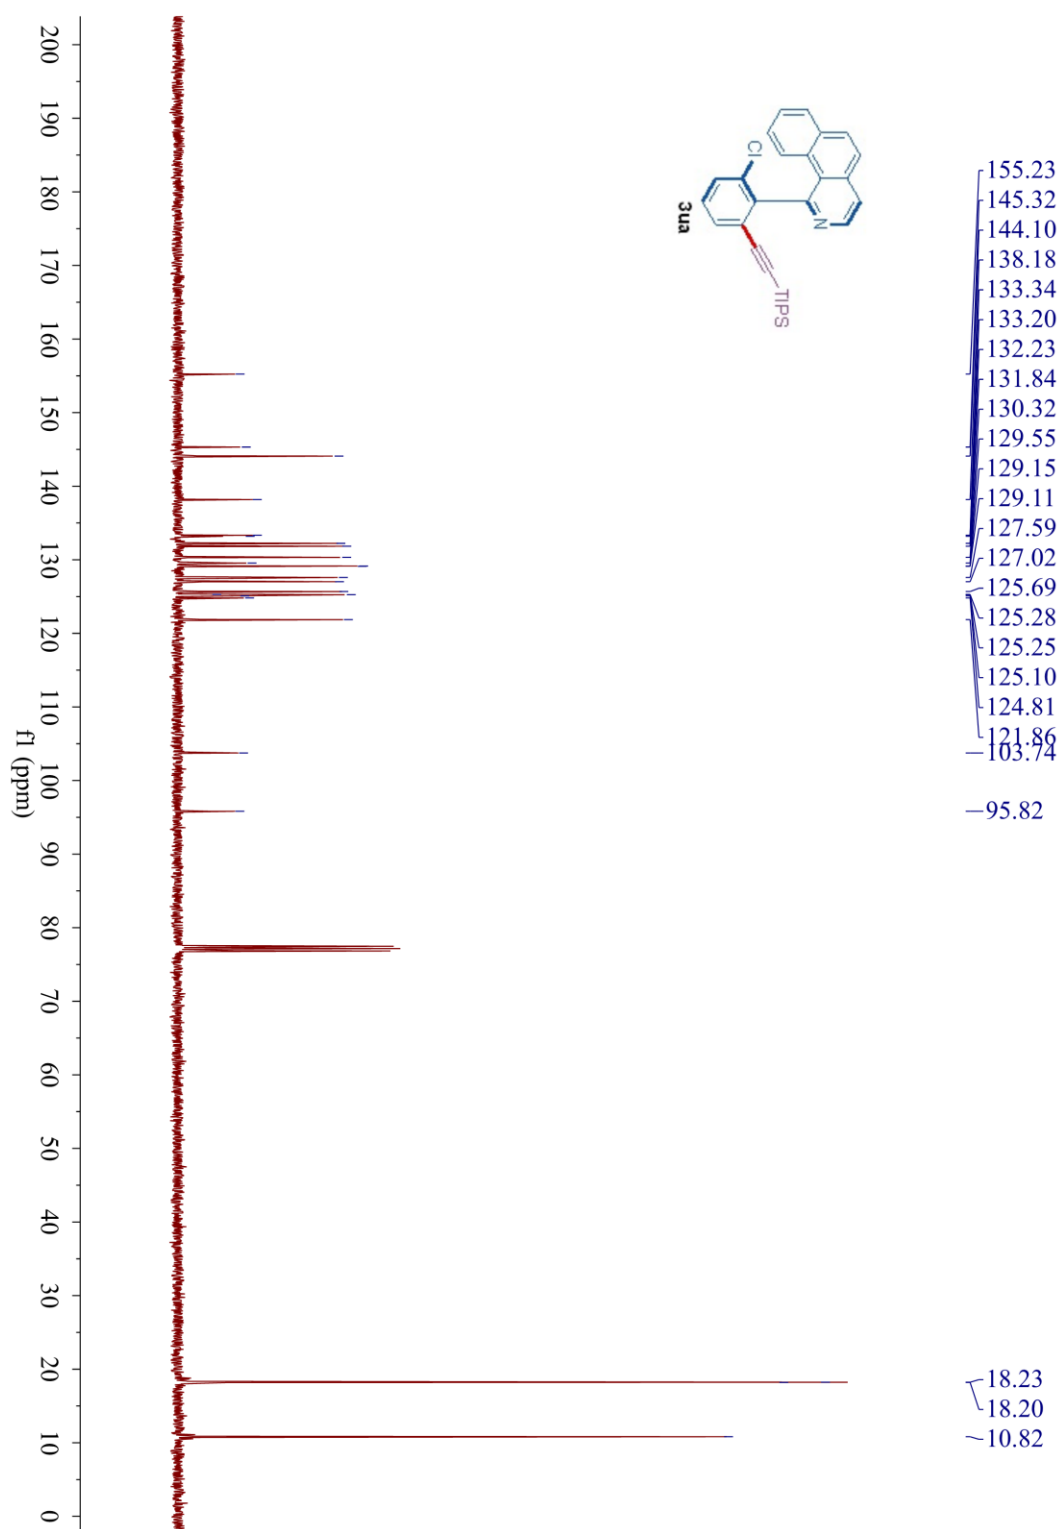



$^1\text{H}$  NMR (400 MHz,  $\text{CDCl}_3$ ) of **4**

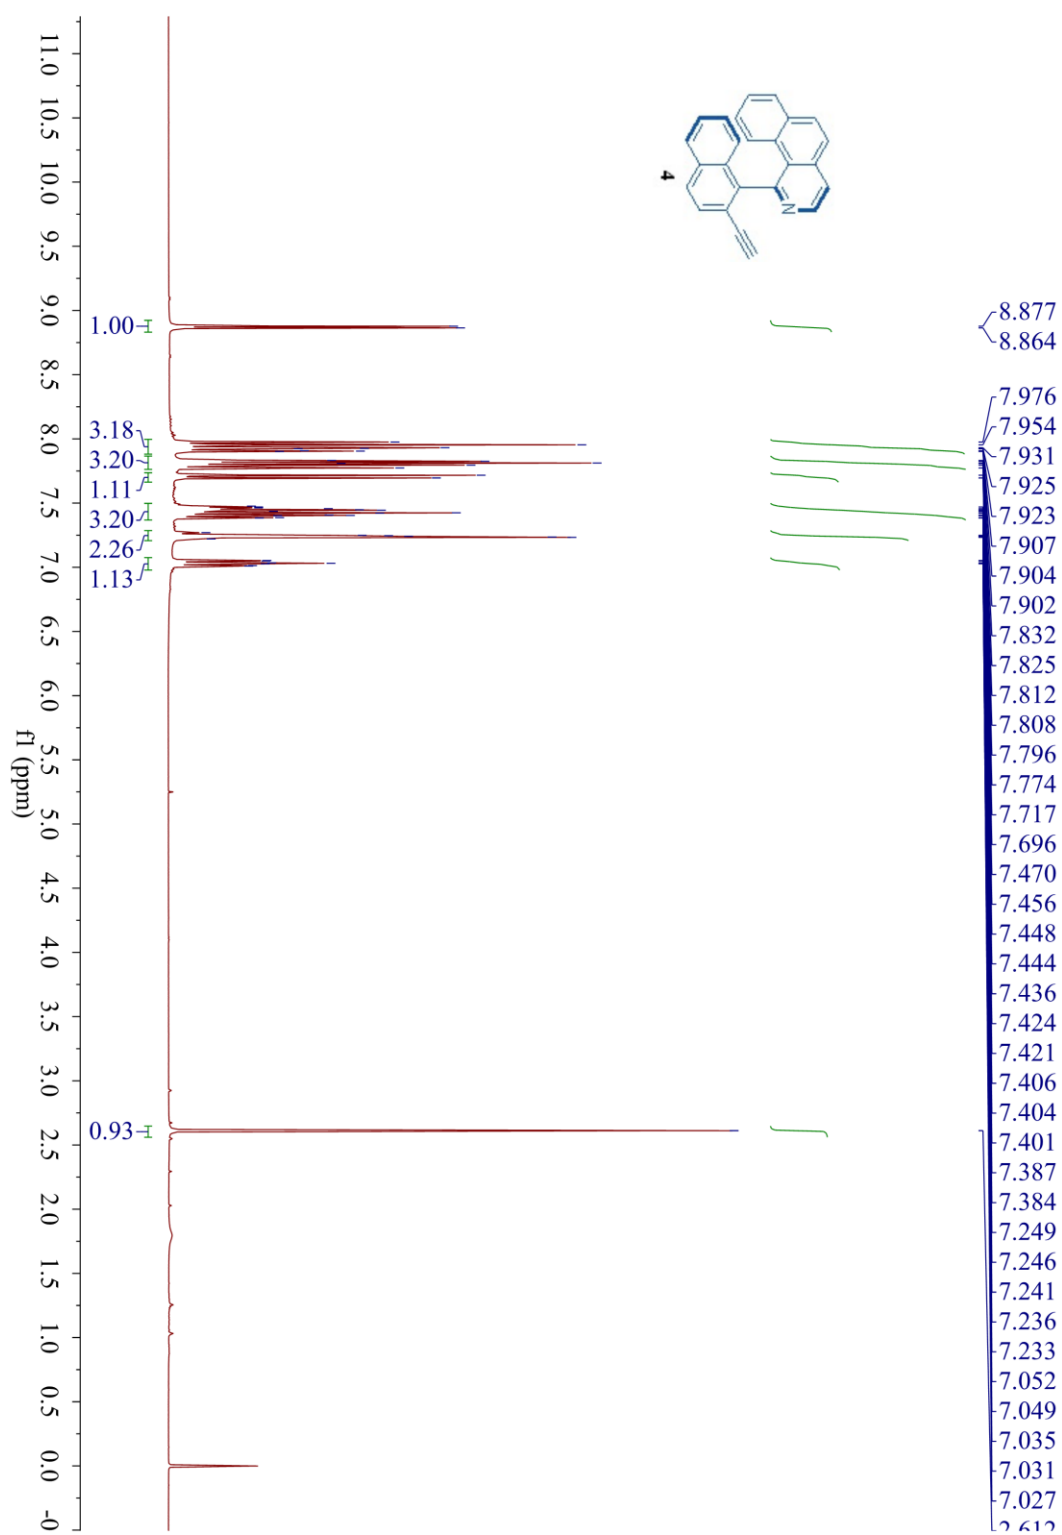

$^{13}\text{C}$  NMR (100 MHz,  $\text{CDCl}_3$ ) of **4**

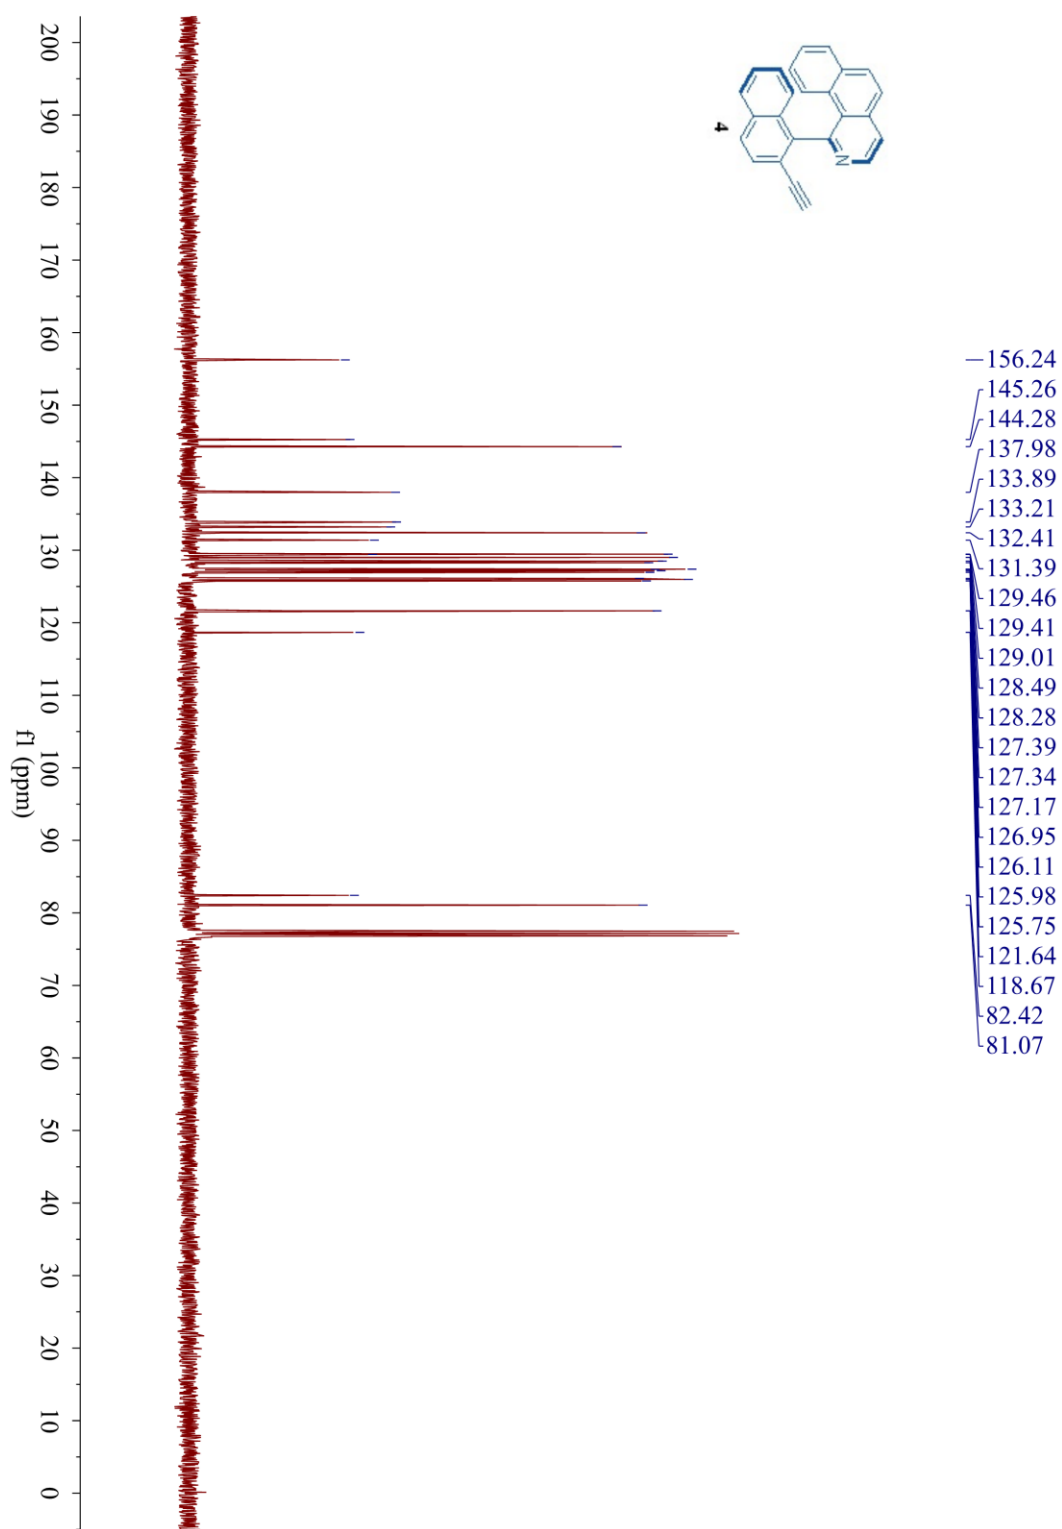

<sup>1</sup>H NMR (400 MHz, CDCl<sub>3</sub>) of **5**

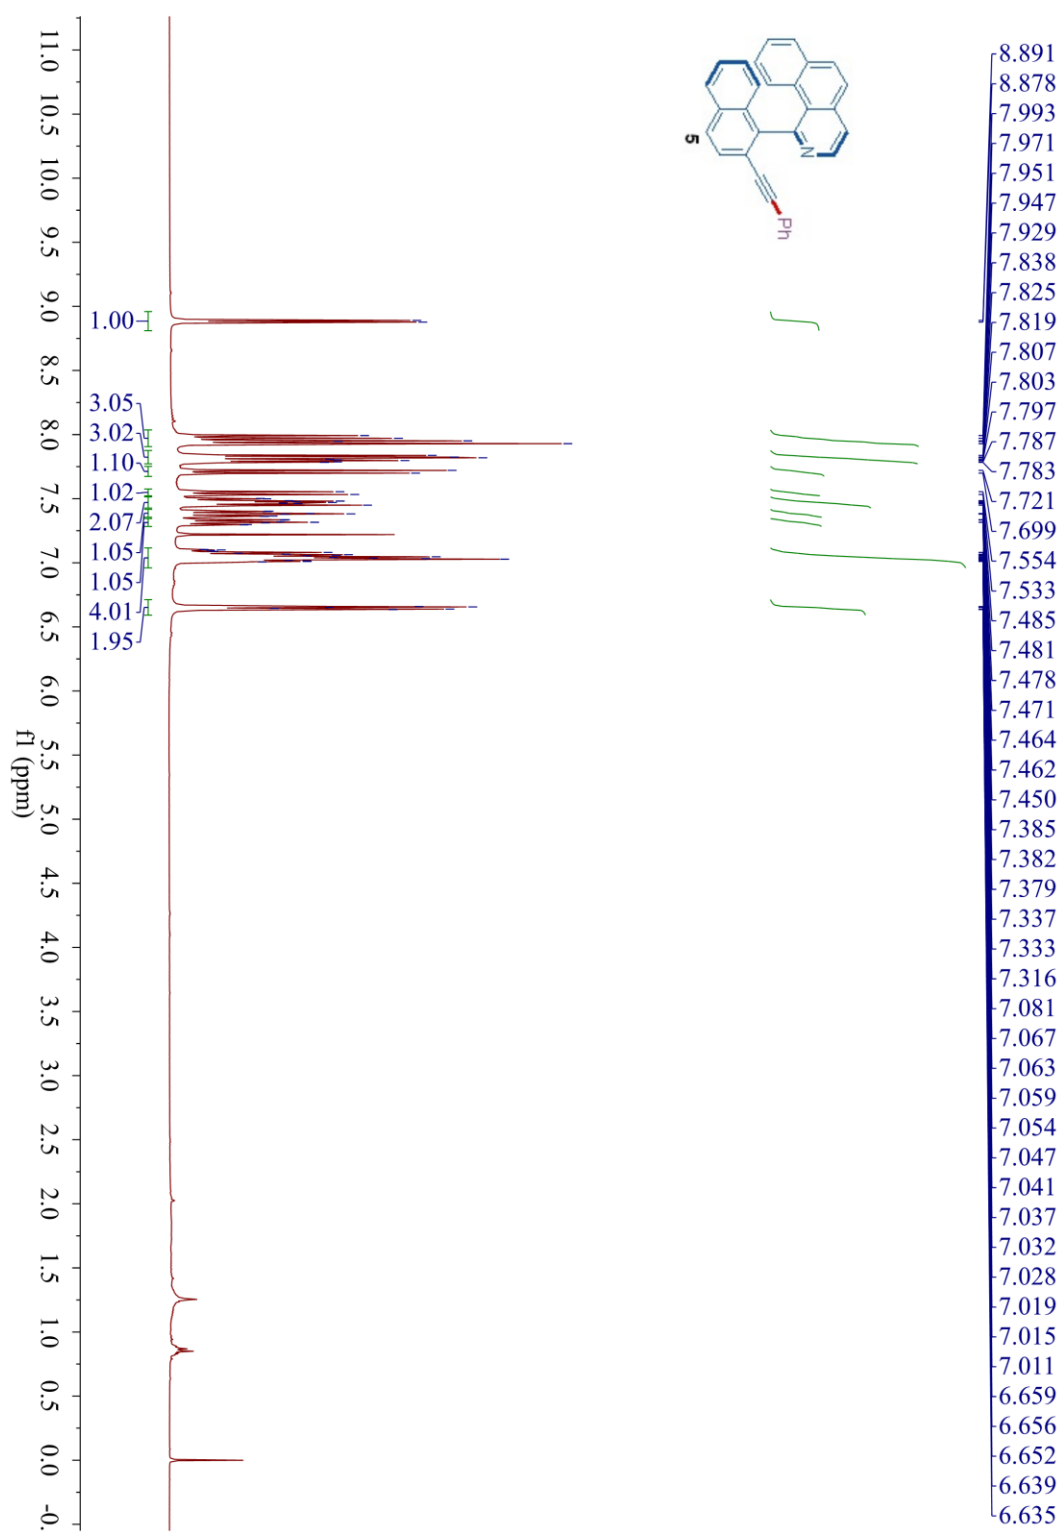

$^{13}\text{C}$  NMR (100 MHz,  $\text{CDCl}_3$ ) of **5**

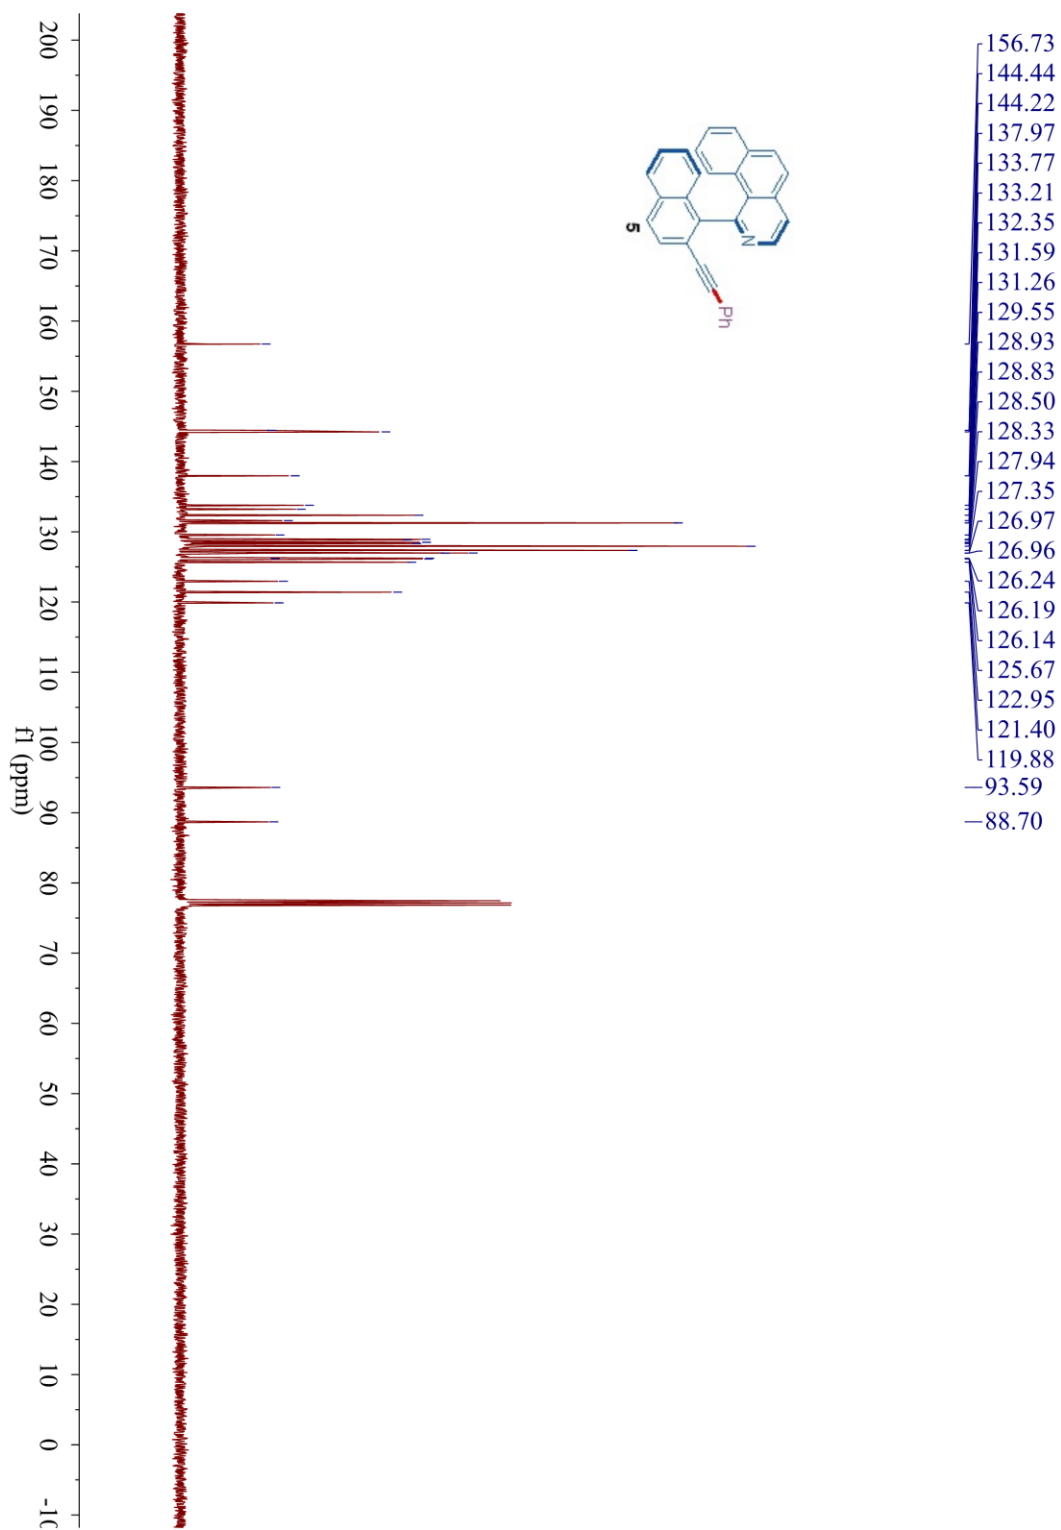

$^1\text{H}$  NMR (400 MHz,  $\text{CDCl}_3$ ) of **6**

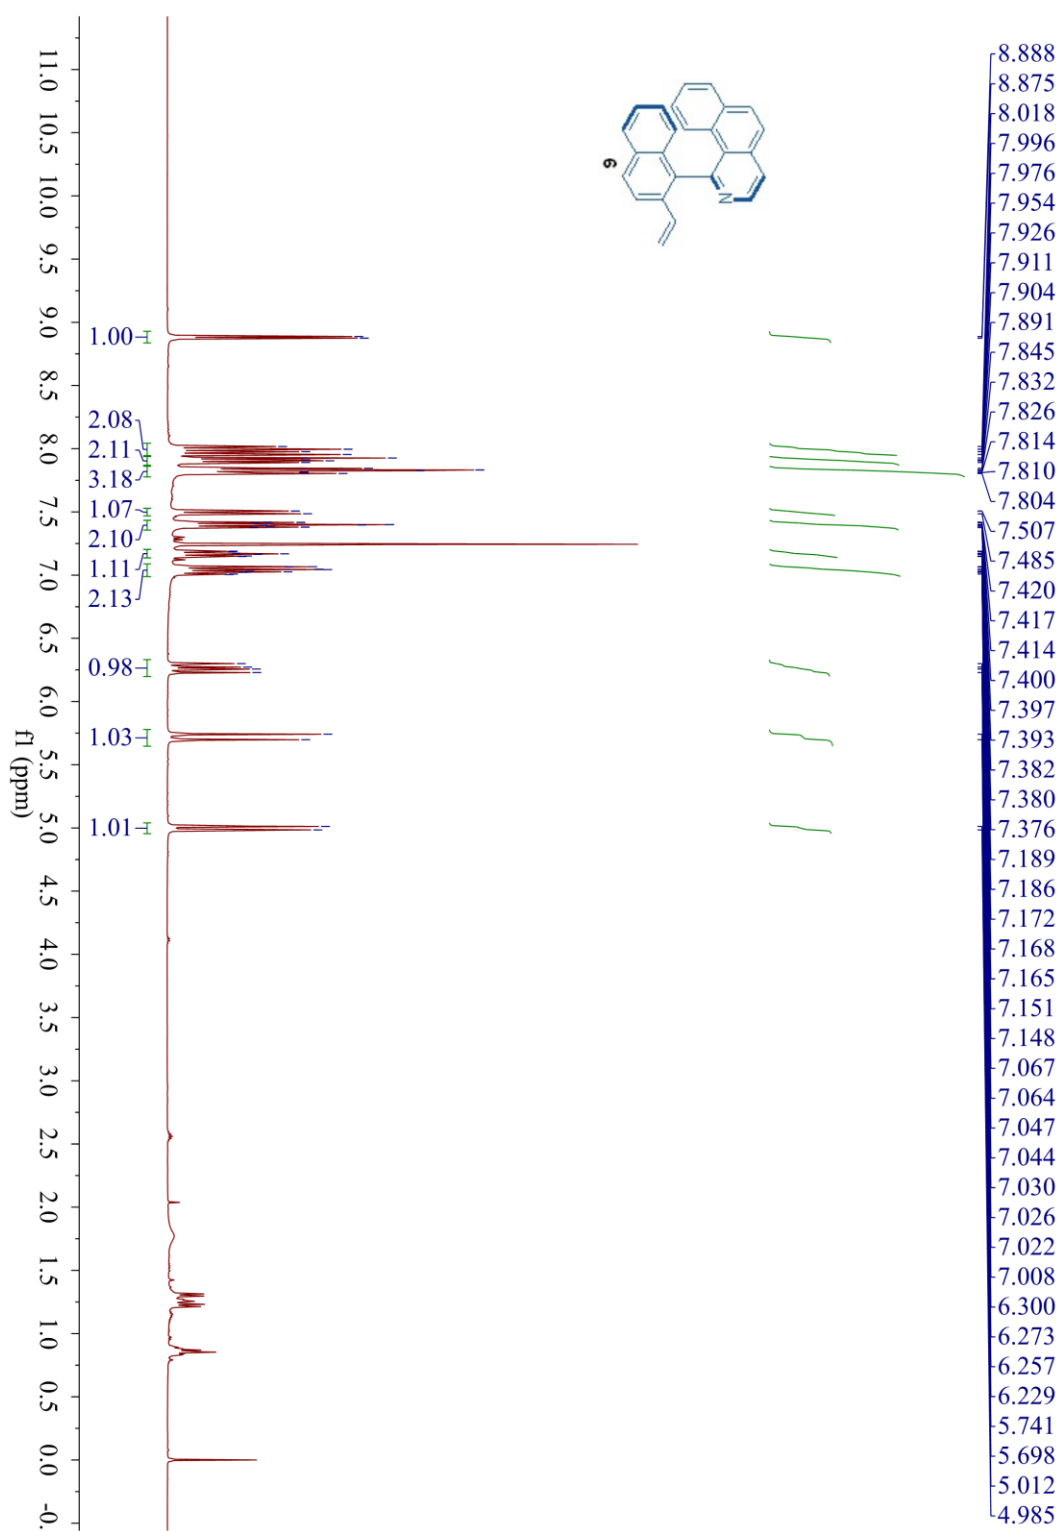

$^{13}\text{C}$  NMR (100 MHz,  $\text{CDCl}_3$ ) of **6**

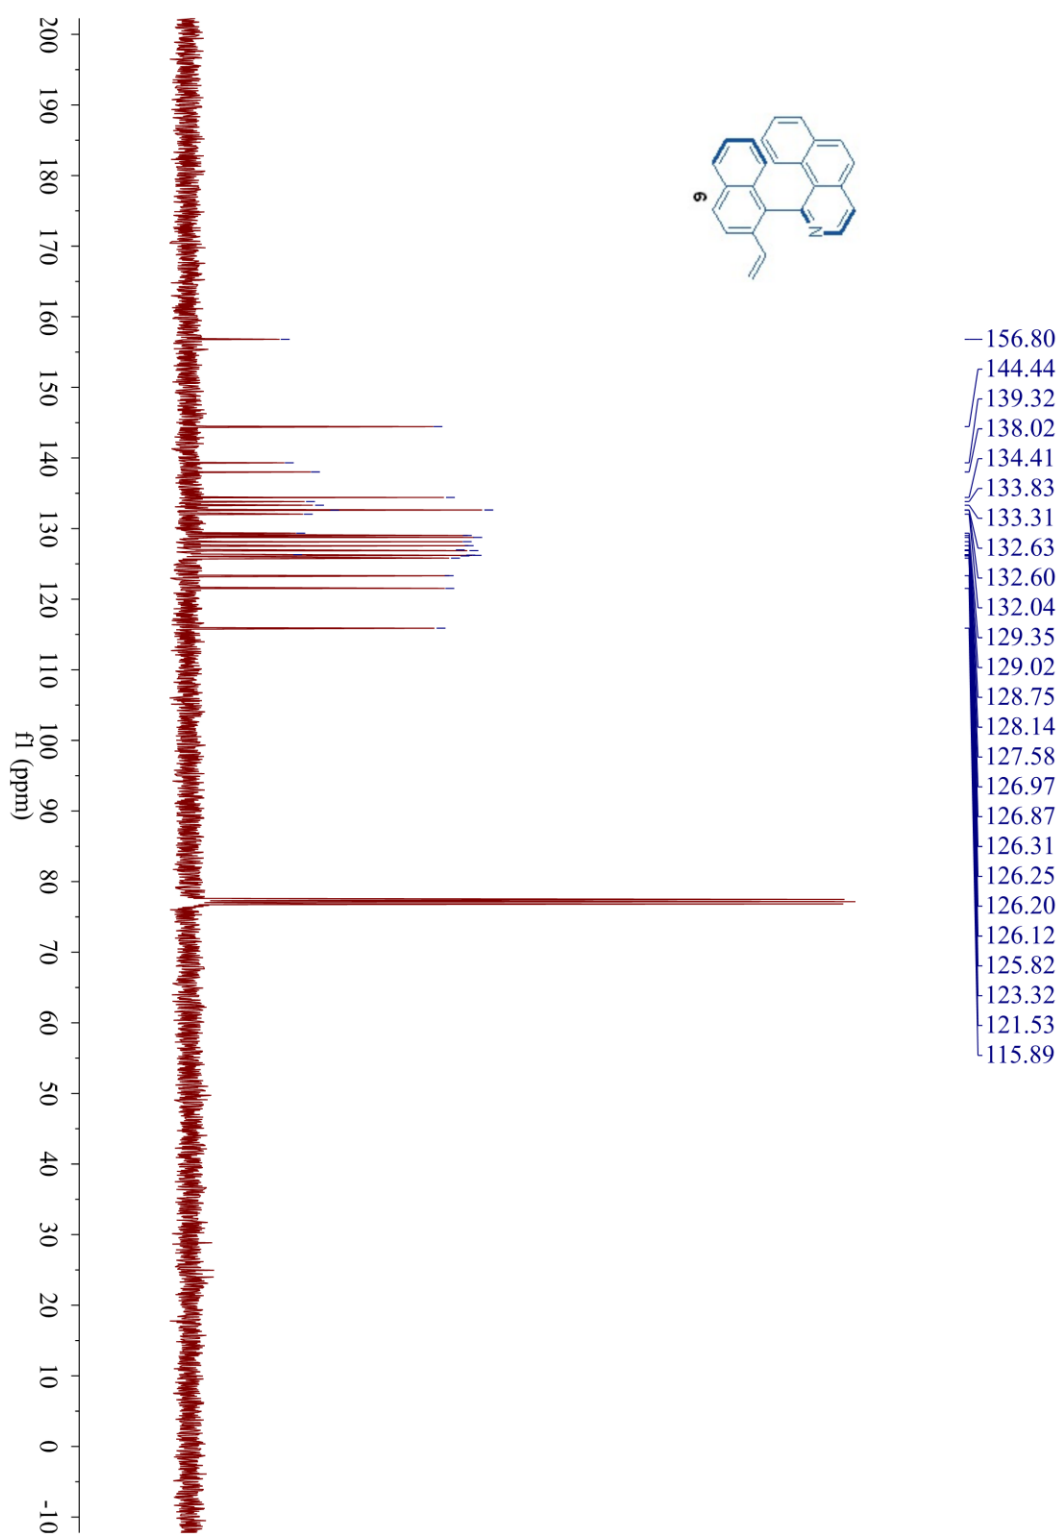

$^1\text{H}$  NMR (400 MHz,  $\text{CDCl}_3$ ) of **7**

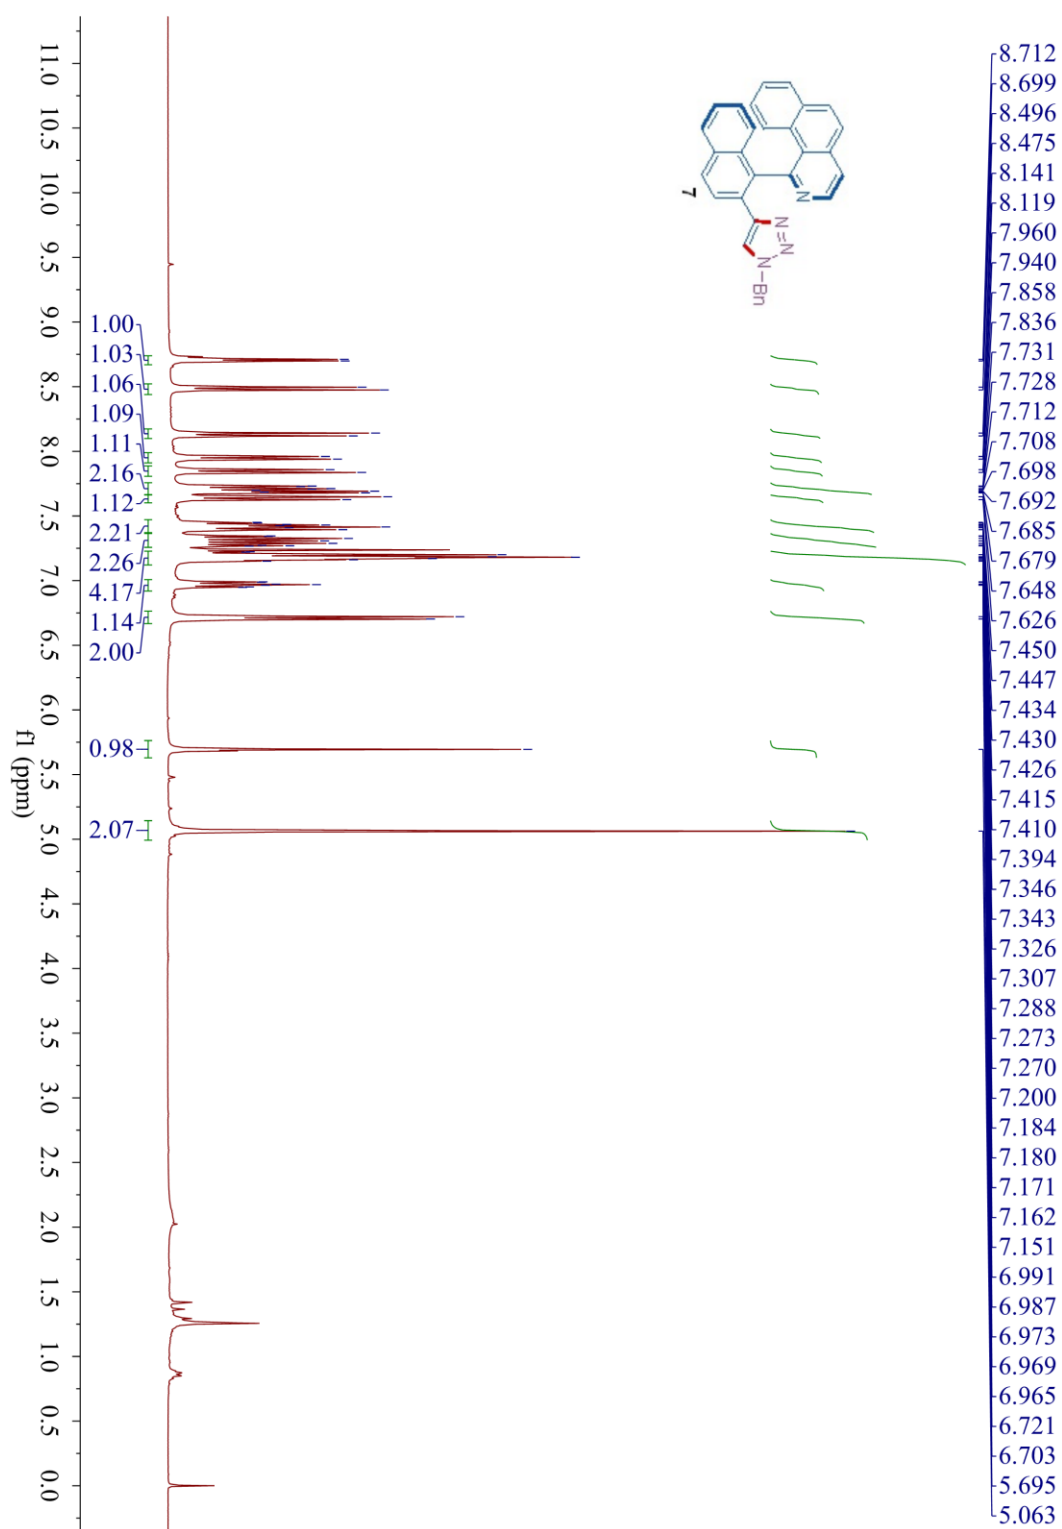

$^{13}\text{C}$  NMR (100 MHz,  $\text{CDCl}_3$ ) of 7

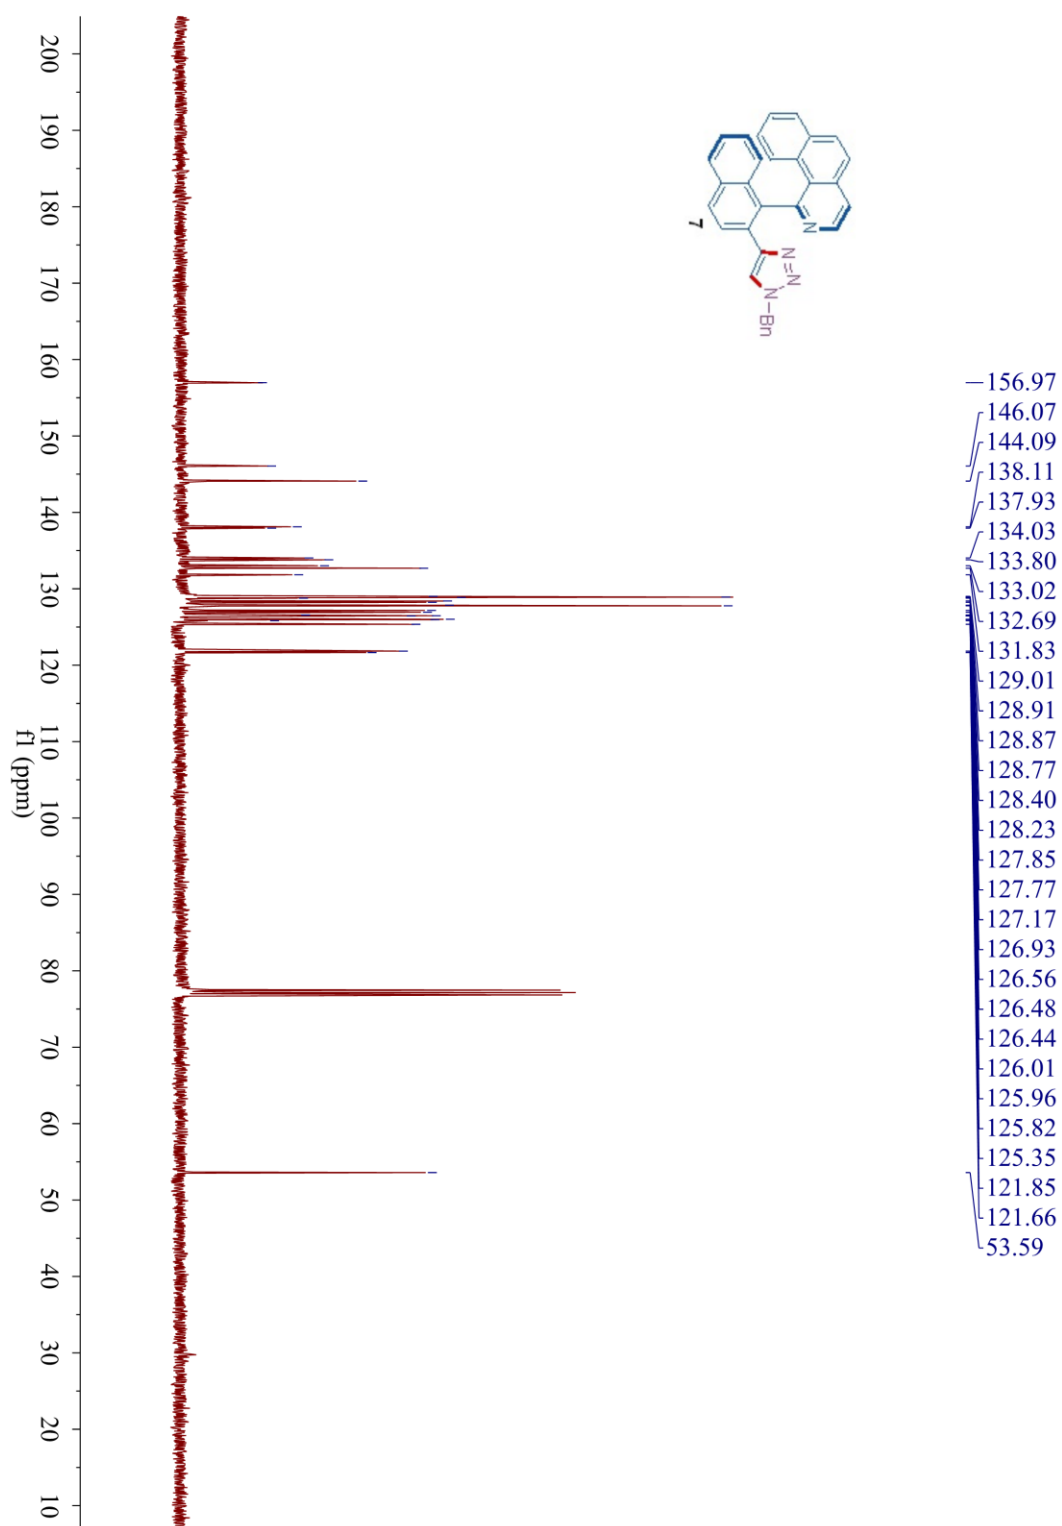



$^1\text{H}$  NMR (400 MHz,  $\text{CDCl}_3$ ) of **8**

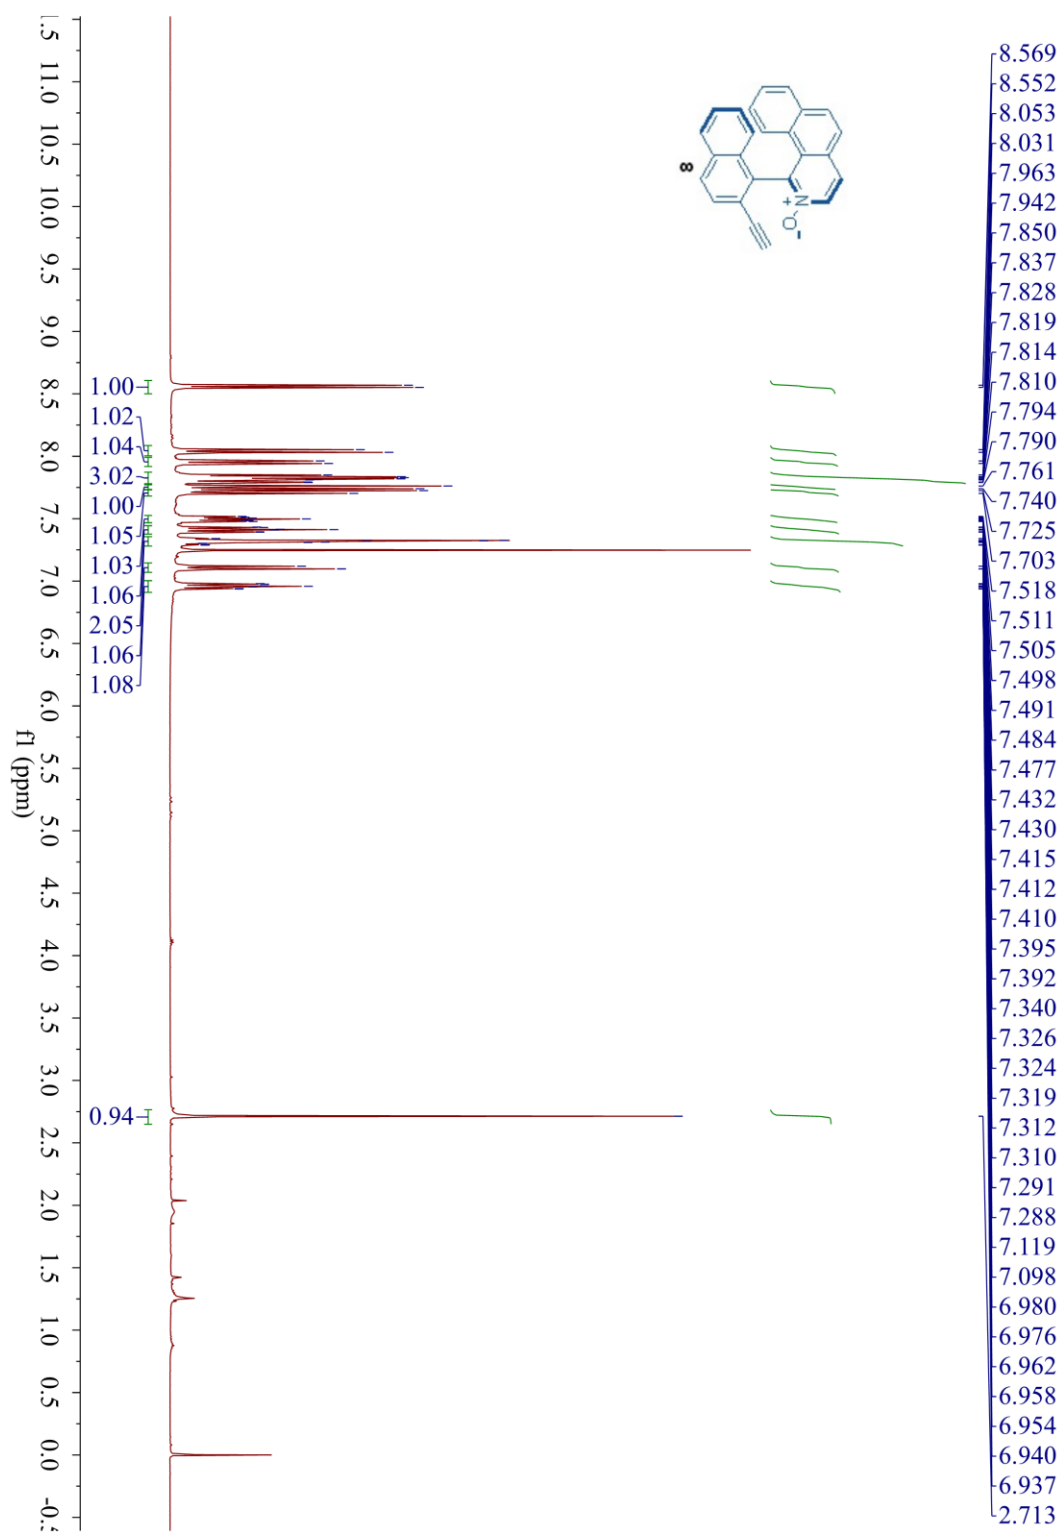

$^{13}\text{C}$  NMR (100 MHz,  $\text{CDCl}_3$ ) of **8**

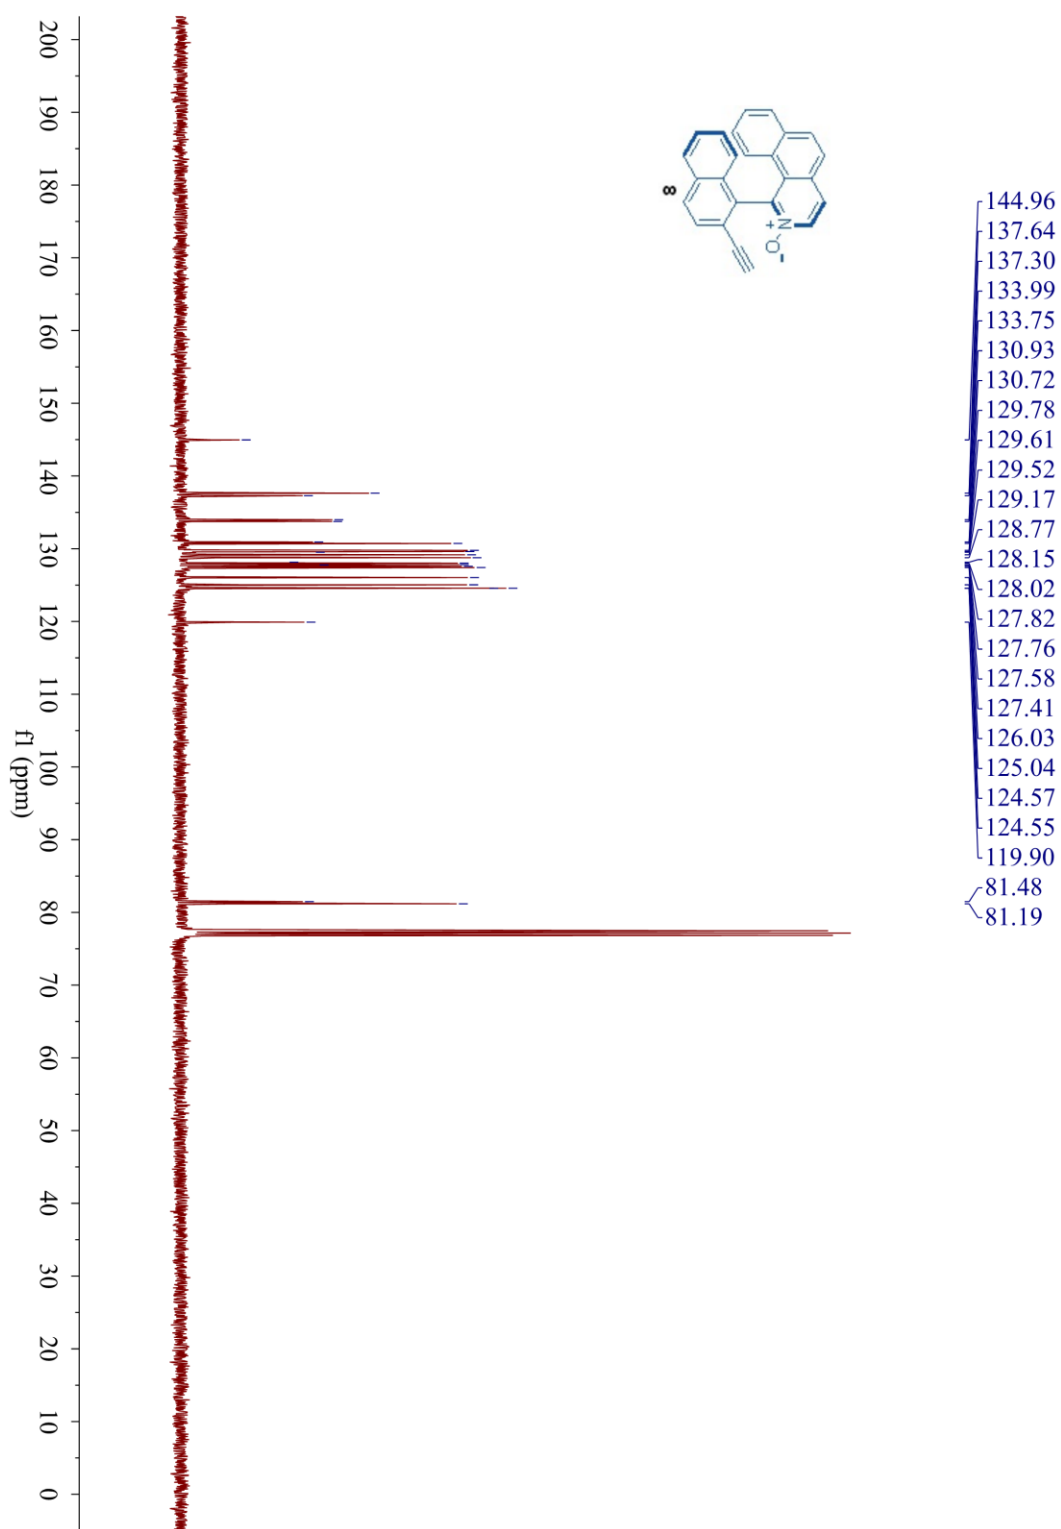

## 7. Copies of HPLC Chromatograms

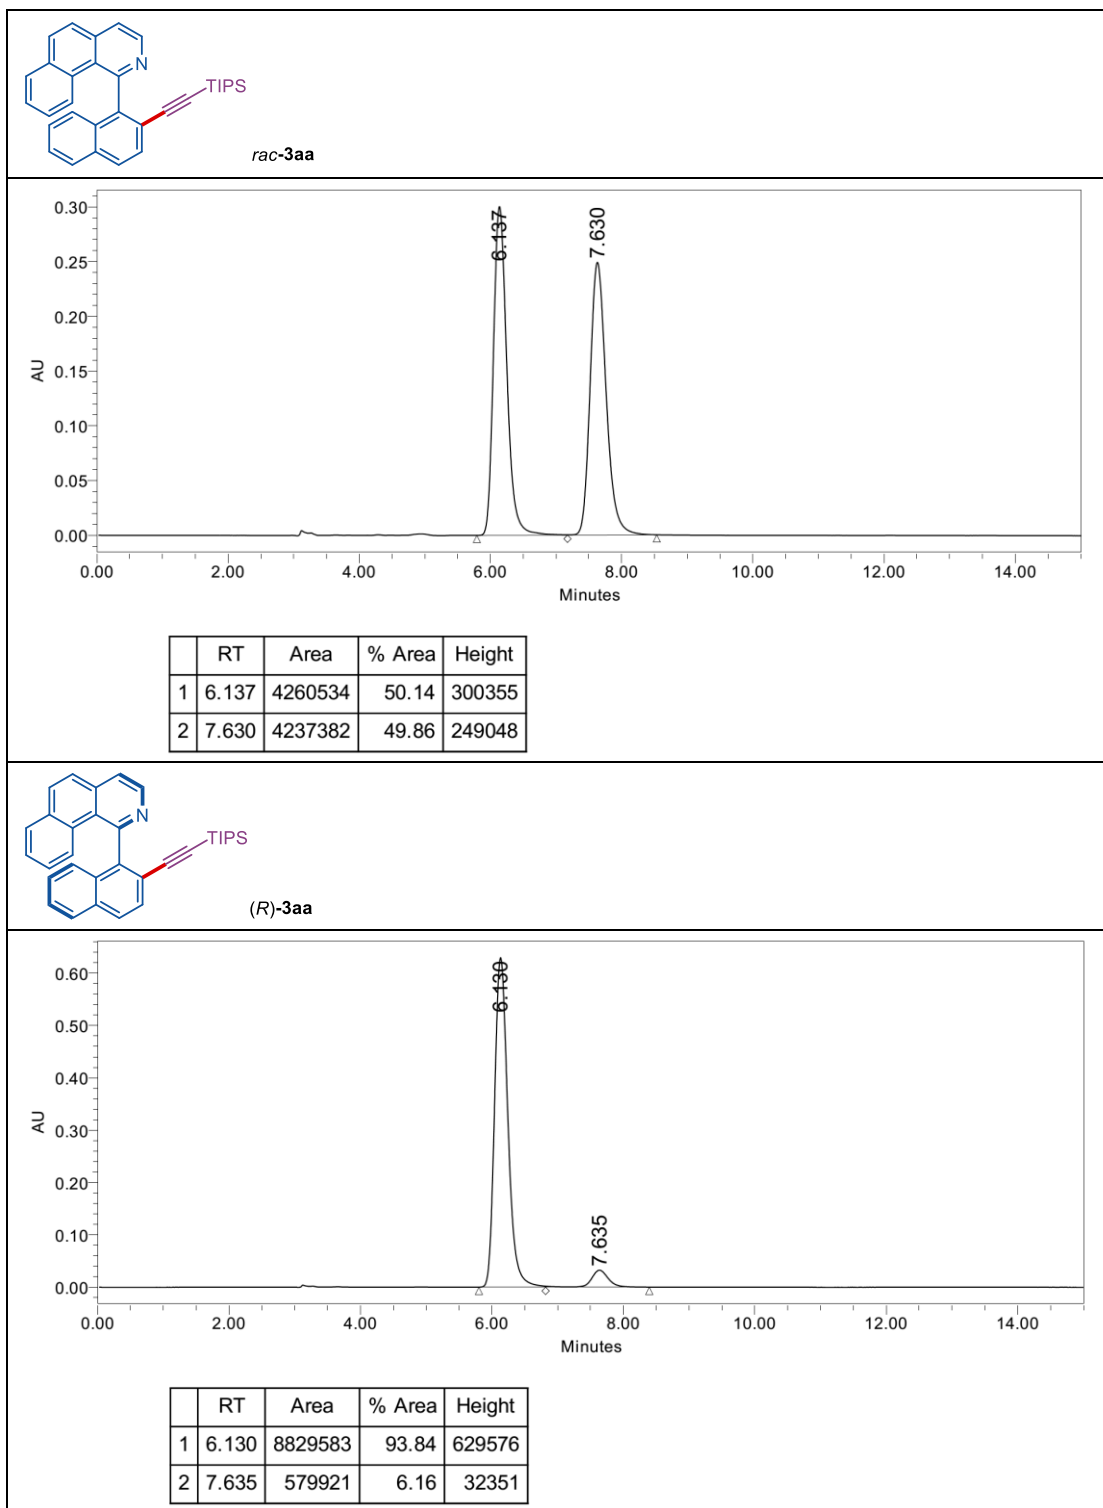

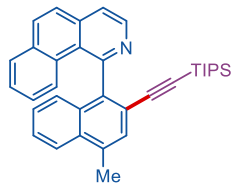

**rac-3ba**

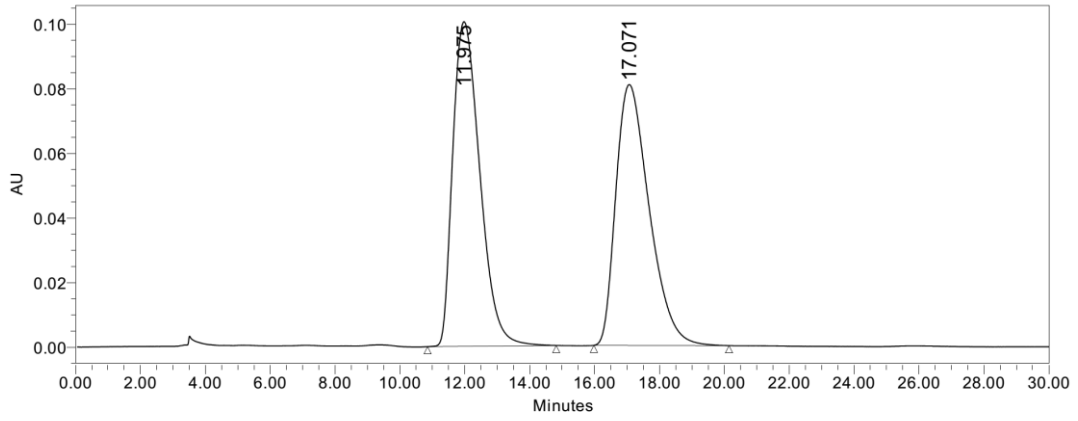

|   | RT     | Area    | % Area | Height |
|---|--------|---------|--------|--------|
| 1 | 11.975 | 5827738 | 50.27  | 100531 |
| 2 | 17.071 | 5766276 | 49.73  | 80783  |

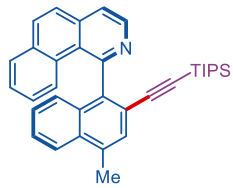

**(R)-3ba**

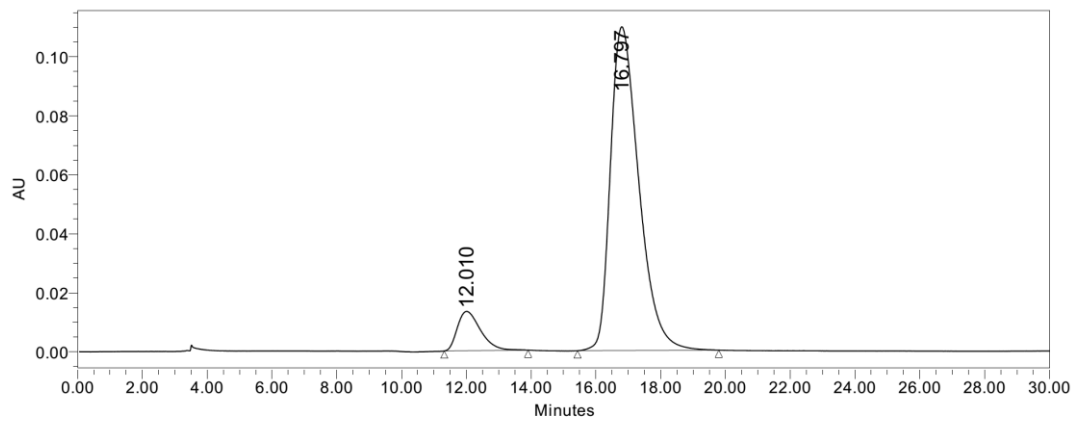

|   | RT     | Area    | % Area | Height |
|---|--------|---------|--------|--------|
| 1 | 12.010 | 663181  | 9.02   | 13330  |
| 2 | 16.797 | 6685473 | 90.98  | 109740 |

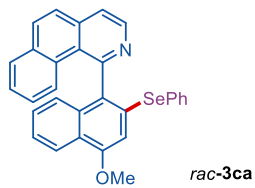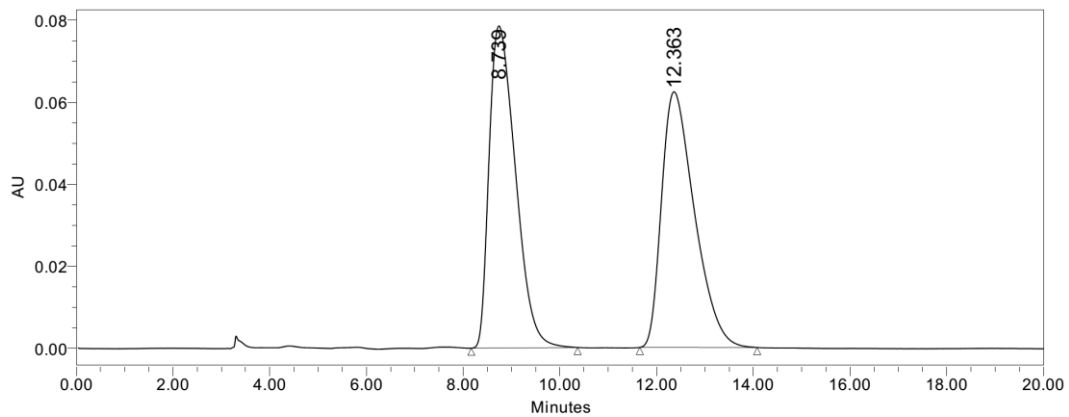

|   | RT     | Area    | % Area | Height |
|---|--------|---------|--------|--------|
| 1 | 8.739  | 2971396 | 50.17  | 78531  |
| 2 | 12.363 | 2951349 | 49.83  | 62333  |

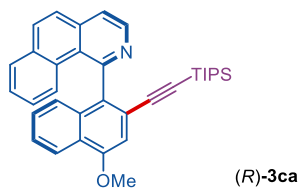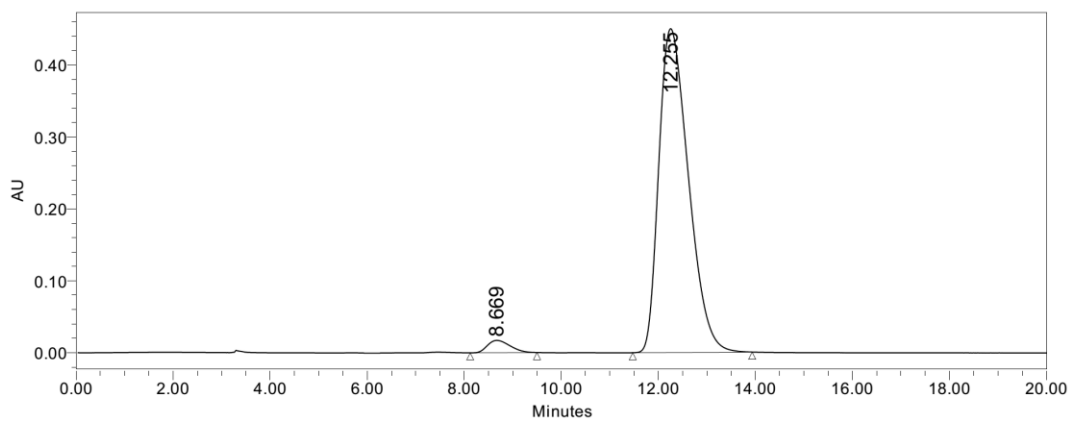

|   | RT     | Area     | % Area | Height |
|---|--------|----------|--------|--------|
| 1 | 8.669  | 554473   | 2.82   | 17133  |
| 2 | 12.255 | 19074061 | 97.18  | 450142 |

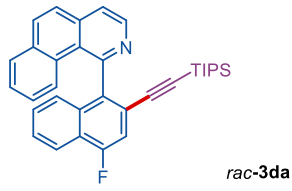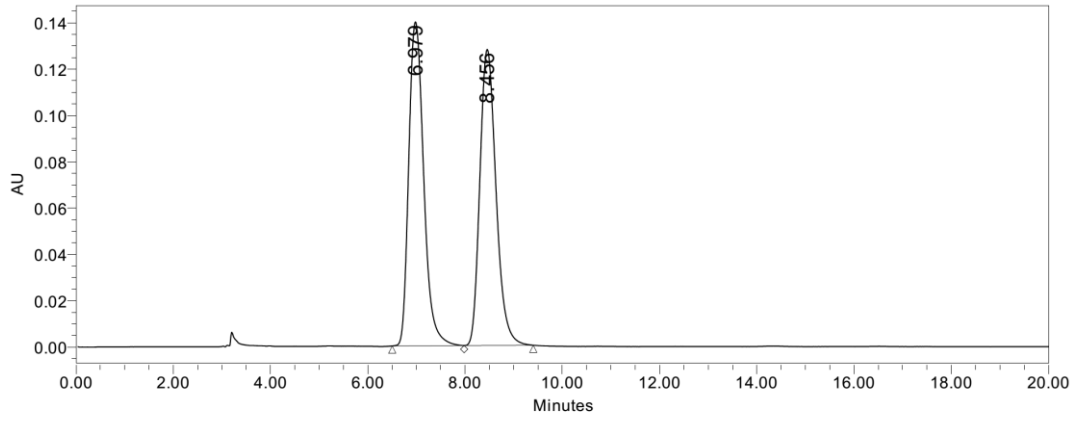

|   | RT    | Area    | % Area | Height |
|---|-------|---------|--------|--------|
| 1 | 6.979 | 2985177 | 50.31  | 139903 |
| 2 | 8.456 | 2948915 | 49.69  | 127849 |

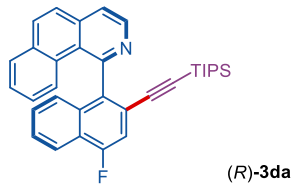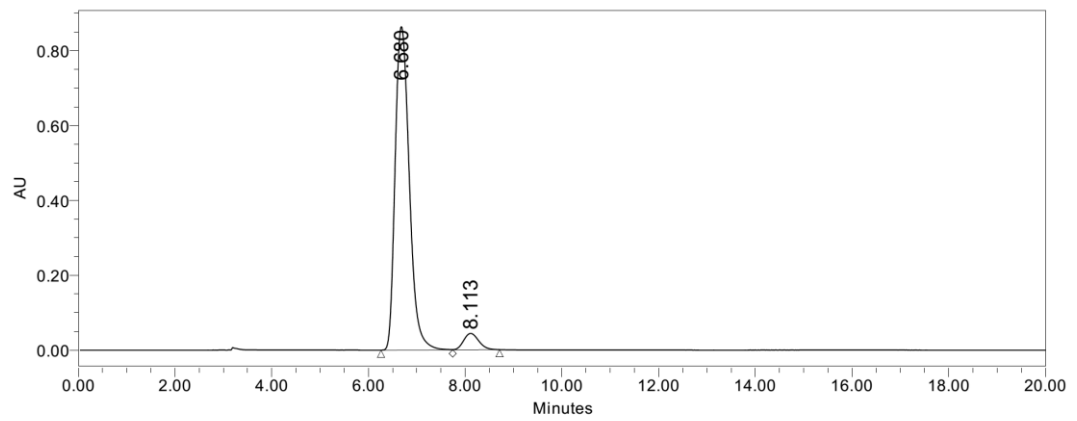

|   | RT    | Area     | % Area | Height |
|---|-------|----------|--------|--------|
| 1 | 6.680 | 17584153 | 94.87  | 864042 |
| 2 | 8.113 | 950758   | 5.13   | 43726  |

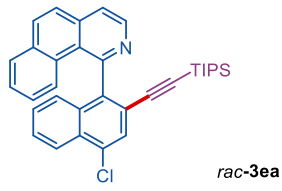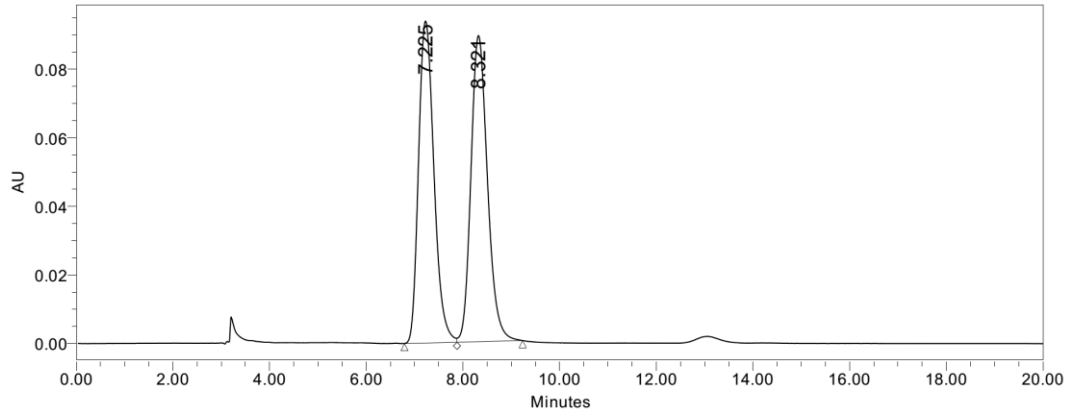

|   | RT    | Area    | % Area | Height |
|---|-------|---------|--------|--------|
| 1 | 7.225 | 2076187 | 49.46  | 93871  |
| 2 | 8.321 | 2121856 | 50.54  | 89260  |

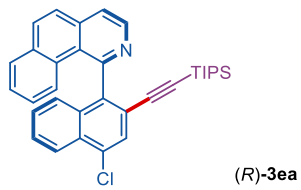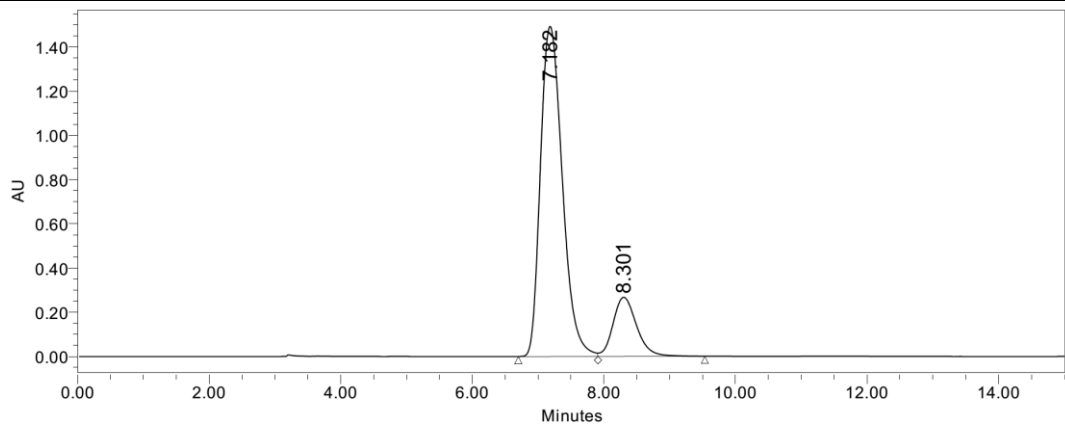

|   | RT    | Area     | % Area | Height  |
|---|-------|----------|--------|---------|
| 1 | 7.182 | 34513877 | 83.84  | 1493241 |
| 2 | 8.301 | 6652168  | 16.16  | 267242  |

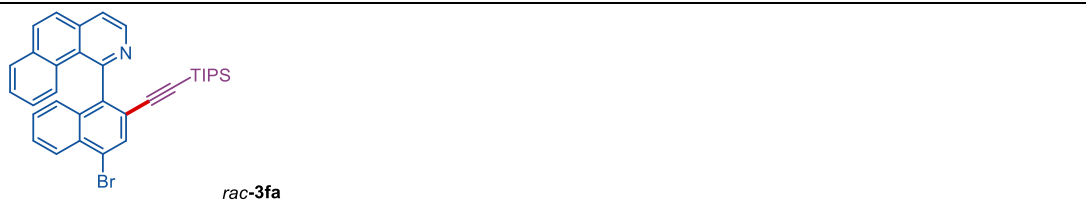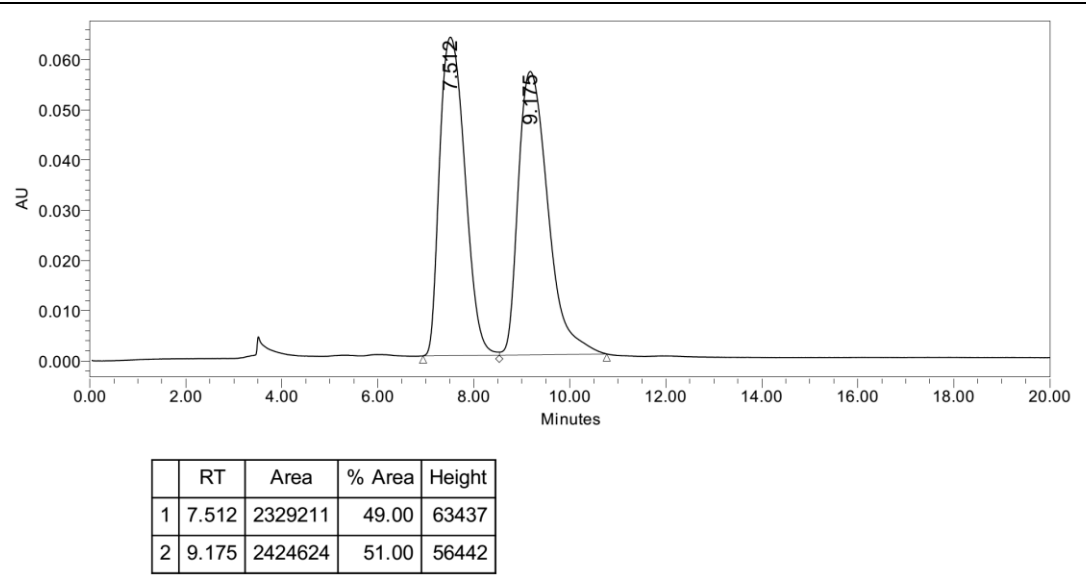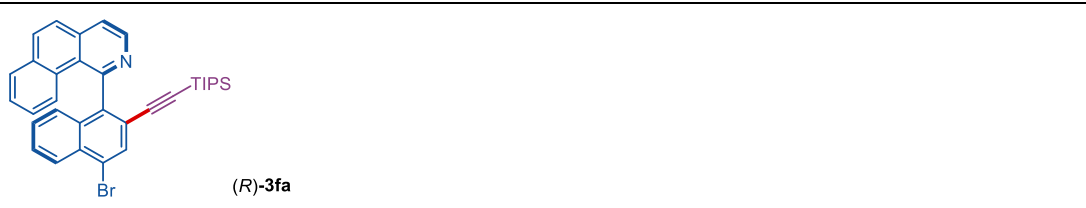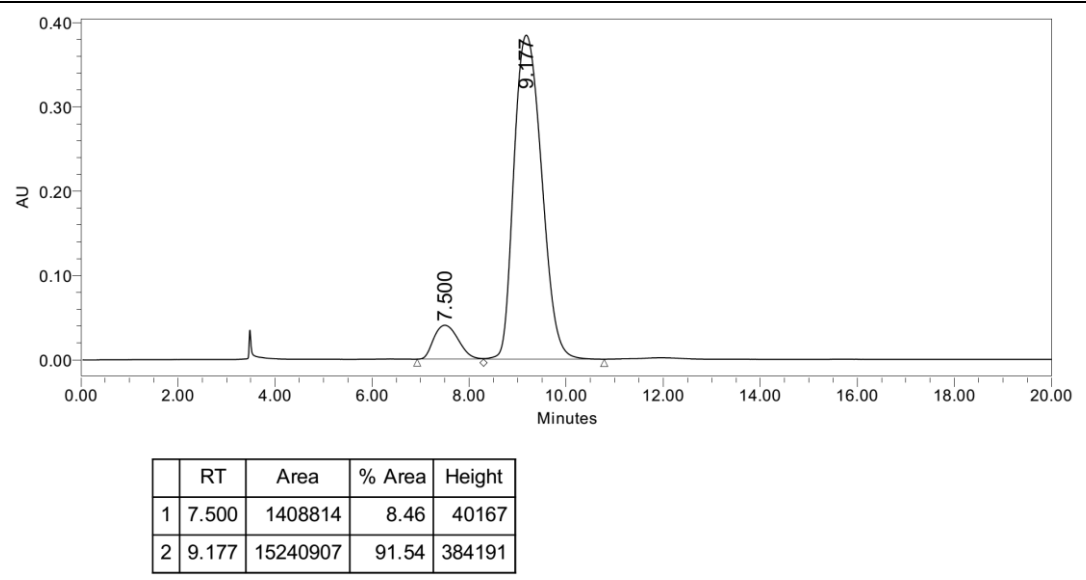



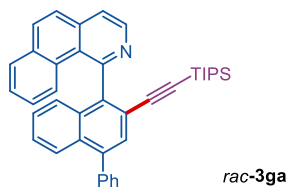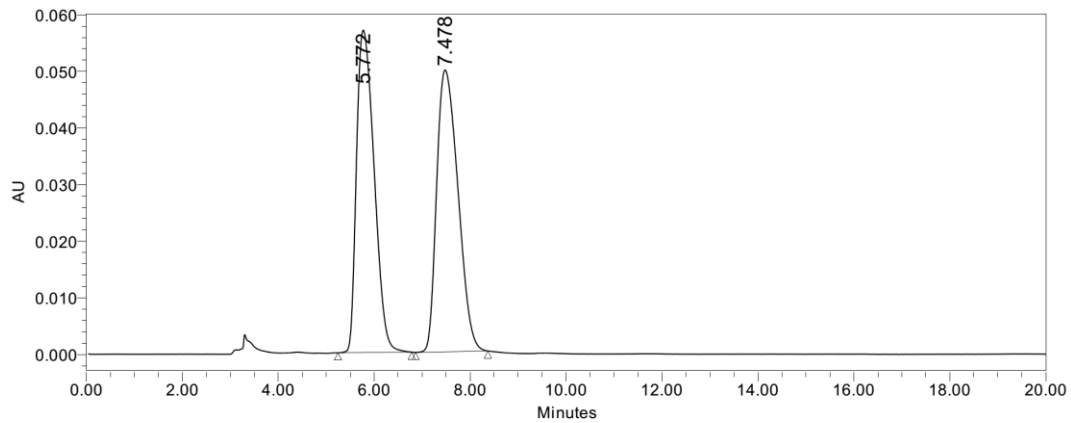

|   | RT    | Area    | % Area | Height |
|---|-------|---------|--------|--------|
| 1 | 5.772 | 1456621 | 48.68  | 56978  |
| 2 | 7.478 | 1535509 | 51.32  | 49804  |

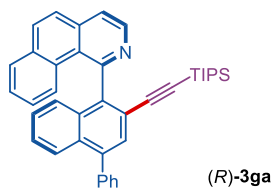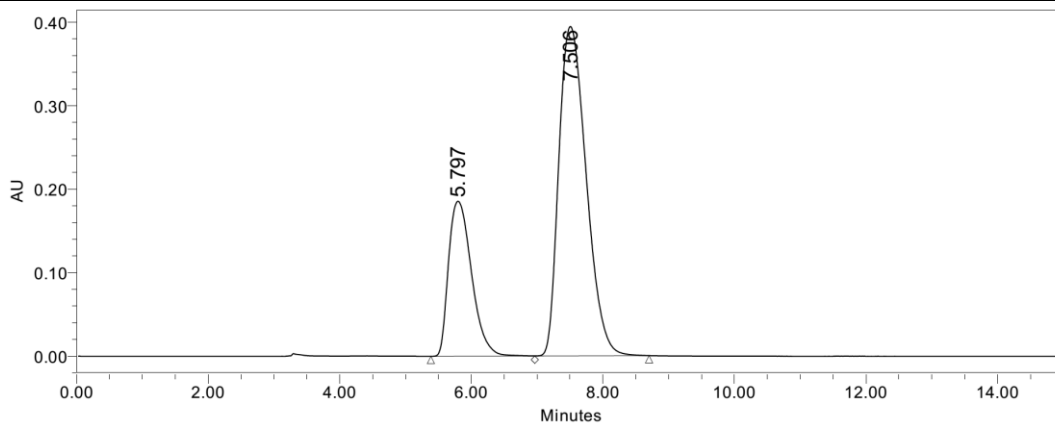

|   | RT    | Area     | % Area | Height |
|---|-------|----------|--------|--------|
| 1 | 5.797 | 4512803  | 28.35  | 185539 |
| 2 | 7.506 | 11408022 | 71.65  | 394474 |

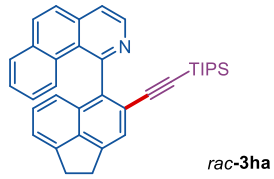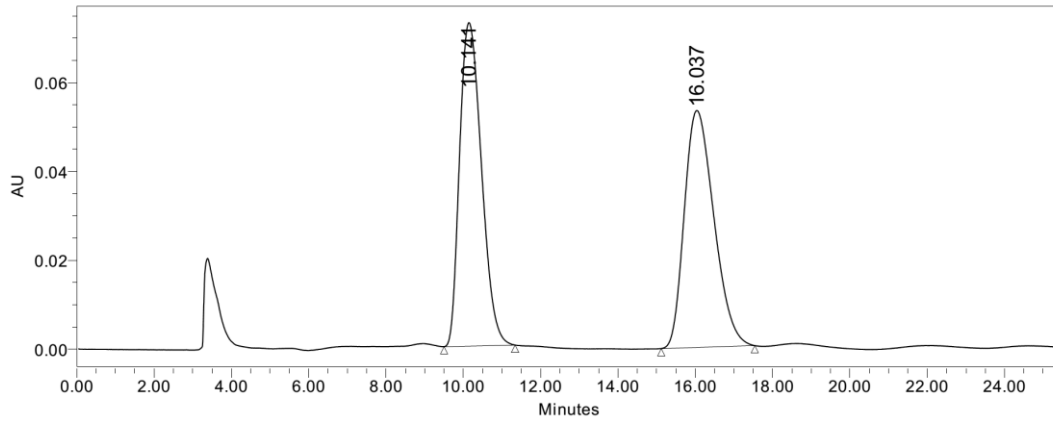

|   | RT     | Area    | % Area | Height |
|---|--------|---------|--------|--------|
| 1 | 10.141 | 2862817 | 50.24  | 72831  |
| 2 | 16.037 | 2835075 | 49.76  | 53340  |

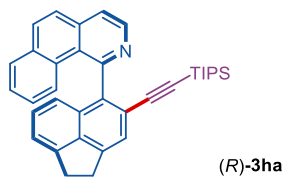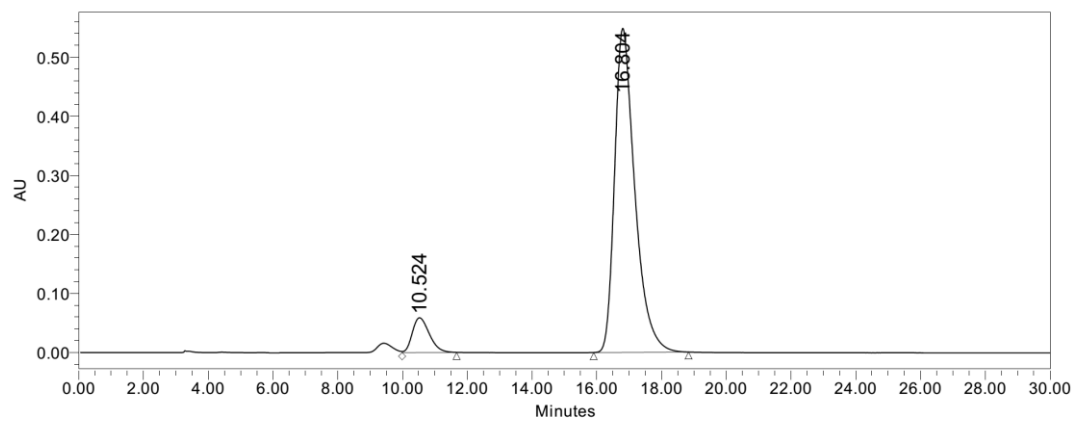

|   | RT     | Area     | % Area | Height |
|---|--------|----------|--------|--------|
| 1 | 10.524 | 2140537  | 8.25   | 58765  |
| 2 | 16.804 | 23807378 | 91.75  | 548648 |

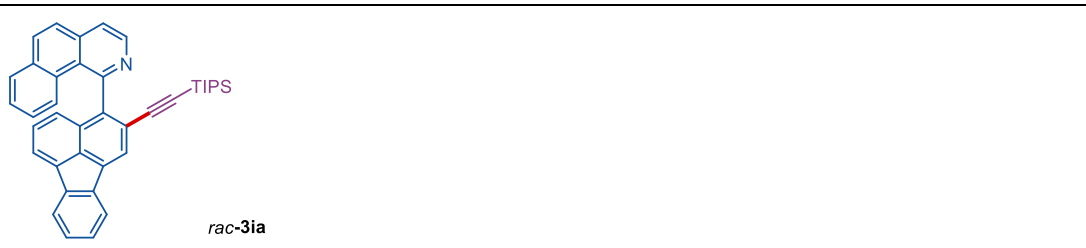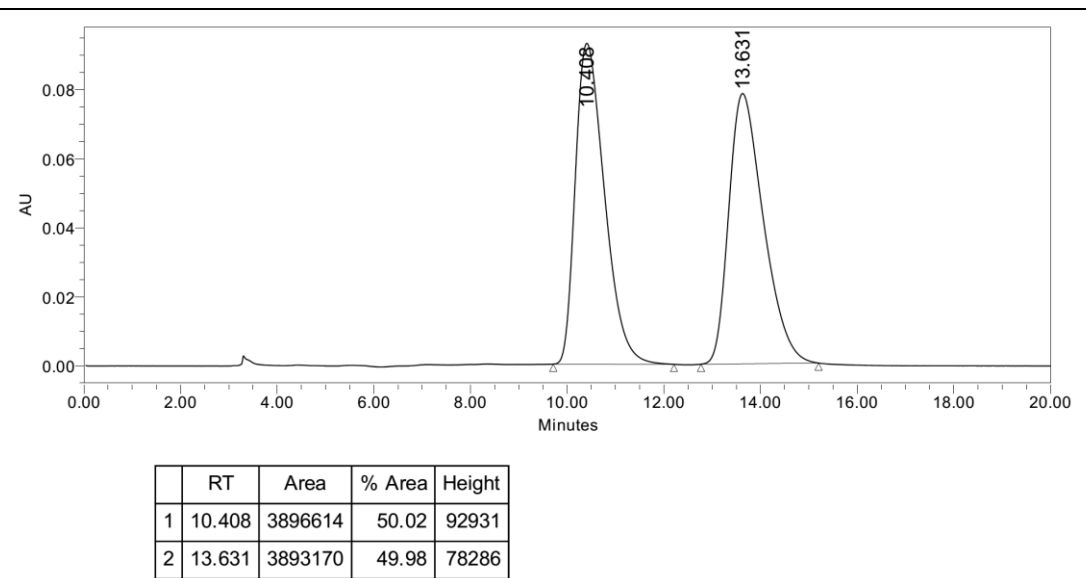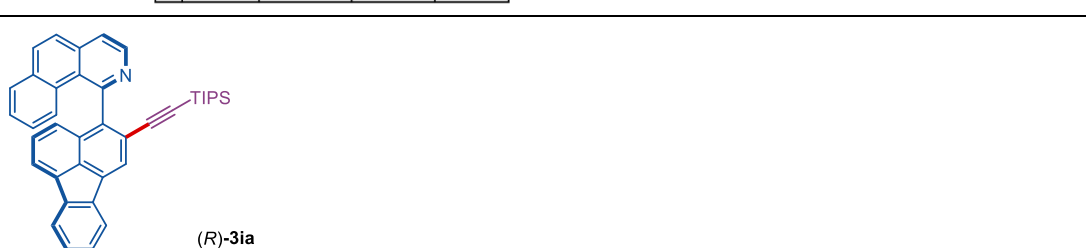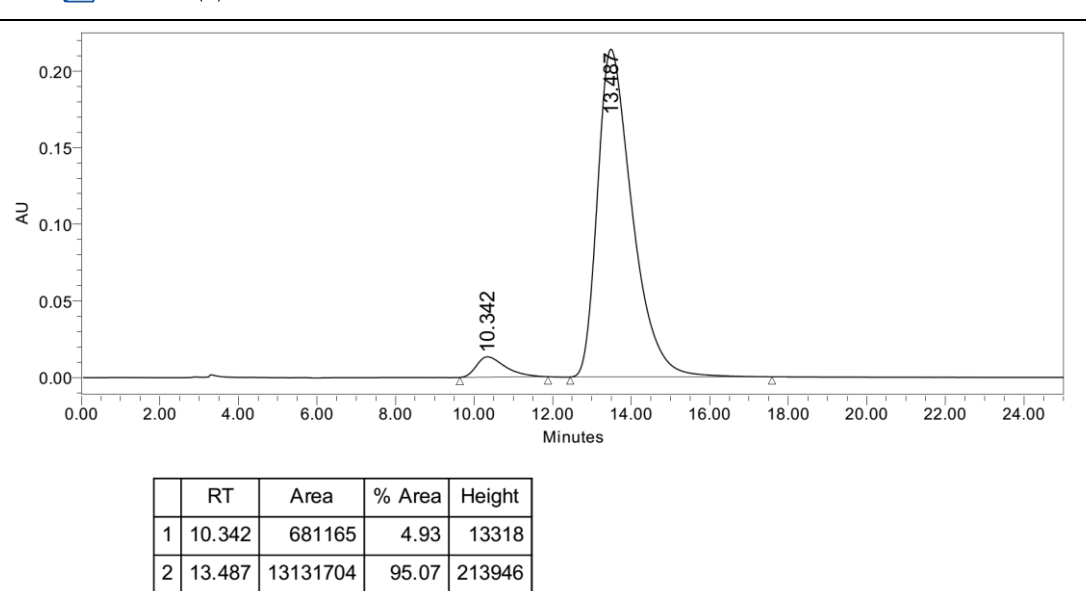

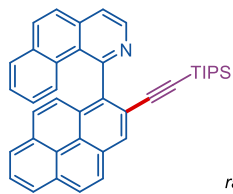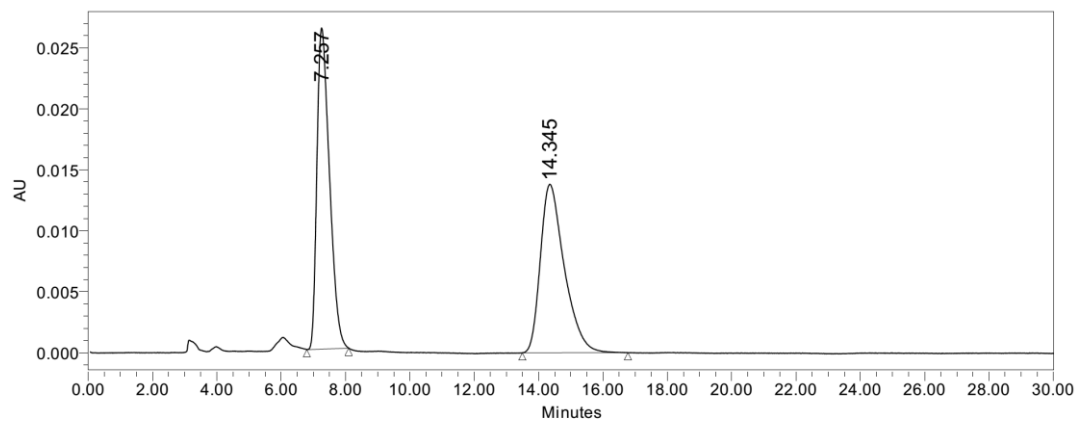

|   | RT     | Area   | % Area | Height |
|---|--------|--------|--------|--------|
| 1 | 7.257  | 713463 | 49.97  | 26341  |
| 2 | 14.345 | 714200 | 50.03  | 13826  |

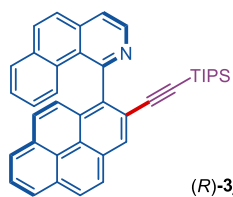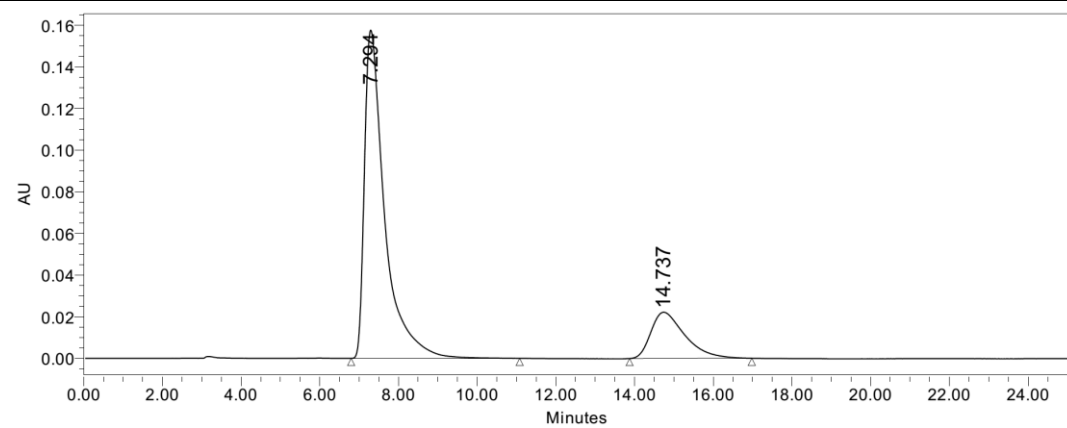

|   | RT     | Area    | % Area | Height |
|---|--------|---------|--------|--------|
| 1 | 7.294  | 5618641 | 80.87  | 157624 |
| 2 | 14.737 | 1329388 | 19.13  | 22221  |

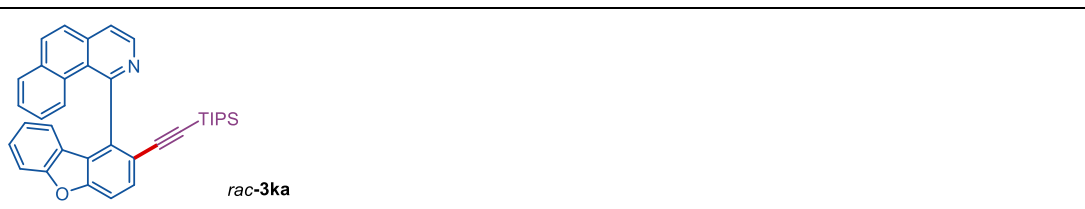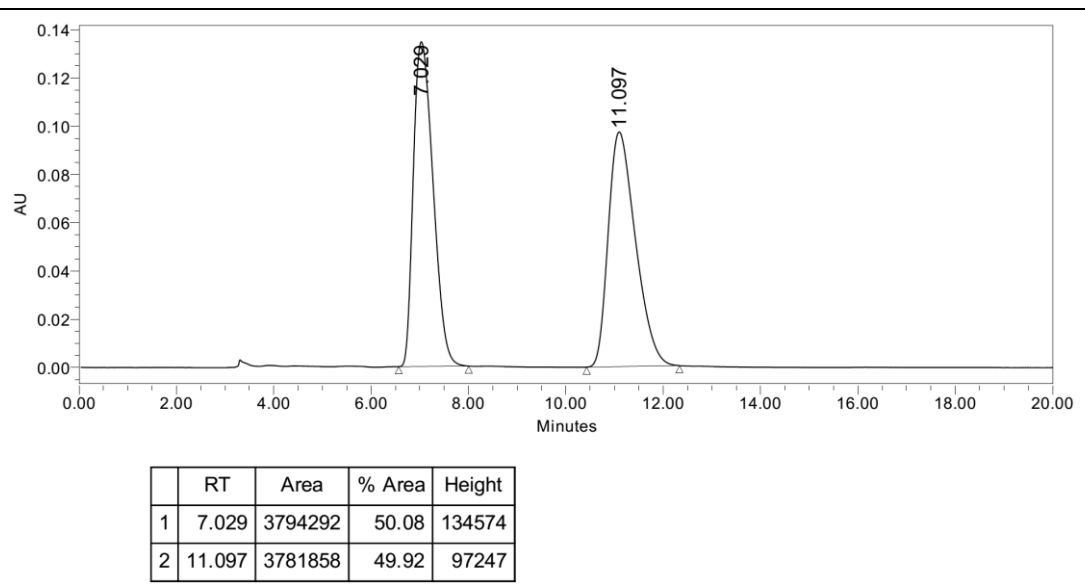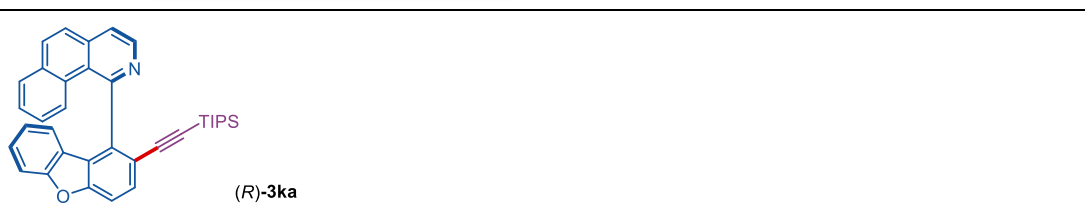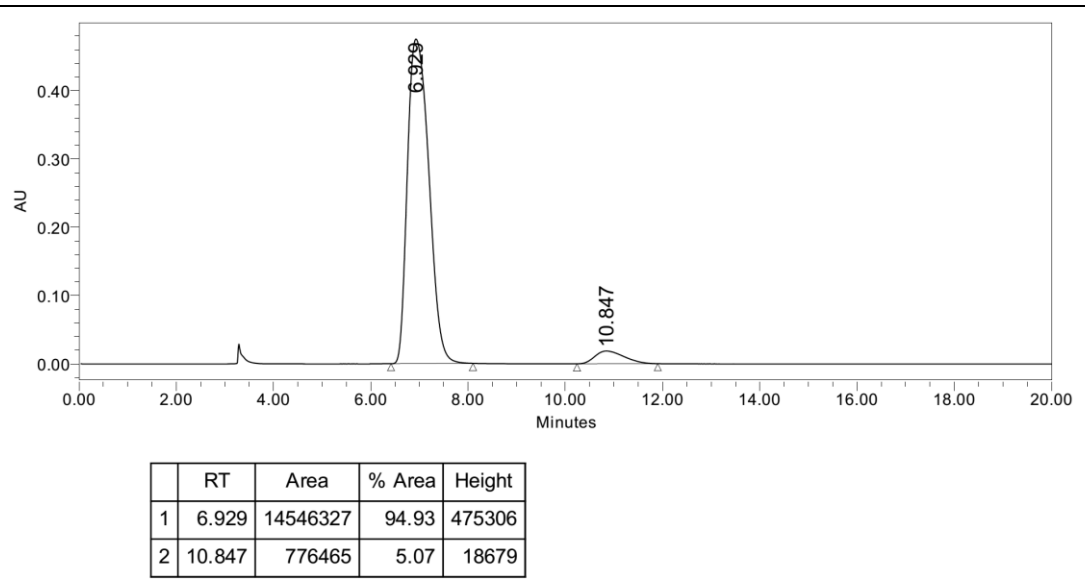

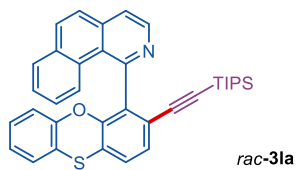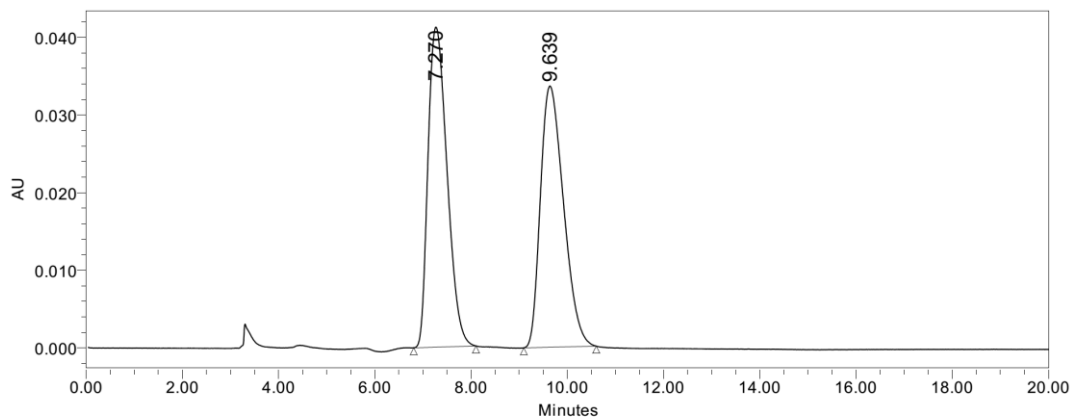

|   | RT    | Area    | % Area | Height |
|---|-------|---------|--------|--------|
| 1 | 7.270 | 1132570 | 50.22  | 41234  |
| 2 | 9.639 | 1122576 | 49.78  | 33651  |

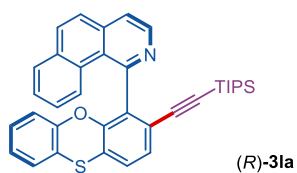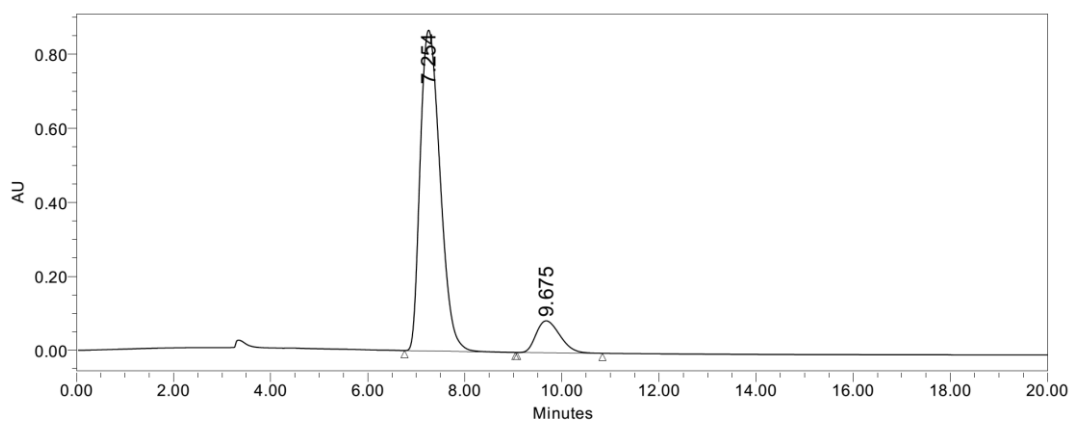

|   | RT    | Area     | % Area | Height |
|---|-------|----------|--------|--------|
| 1 | 7.254 | 24665408 | 89.39  | 866808 |
| 2 | 9.675 | 2927210  | 10.61  | 86171  |

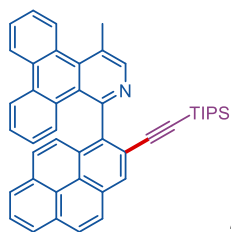

*rac*-3ma

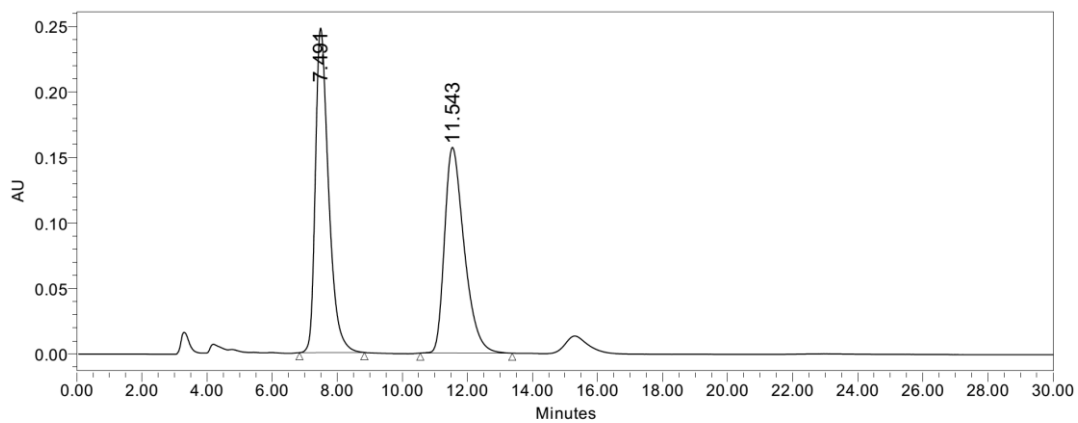

|   | RT     | Area    | % Area | Height |
|---|--------|---------|--------|--------|
| 1 | 7.491  | 6989248 | 51.40  | 247743 |
| 2 | 11.543 | 6607271 | 48.60  | 157034 |

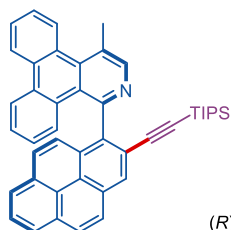

(*R*)-3ma

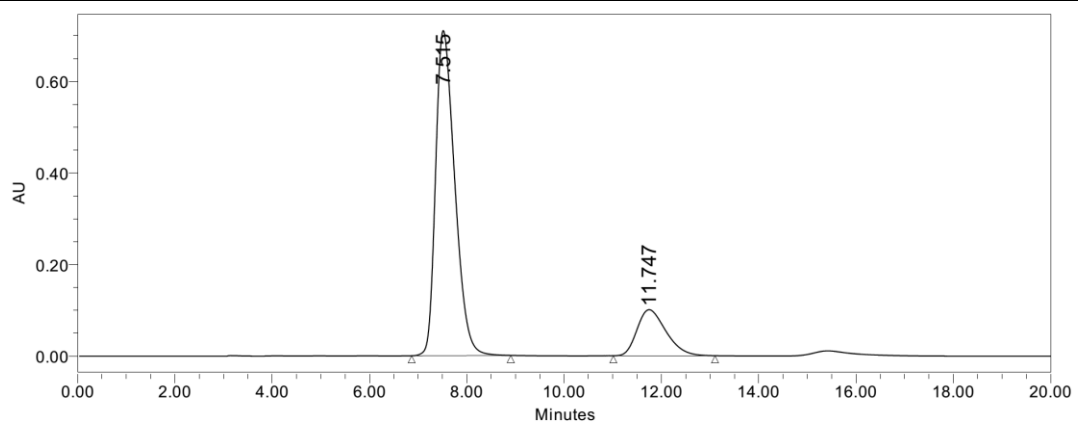

|   | RT     | Area     | % Area | Height |
|---|--------|----------|--------|--------|
| 1 | 7.515  | 19415056 | 82.35  | 710431 |
| 2 | 11.747 | 4159923  | 17.65  | 100668 |

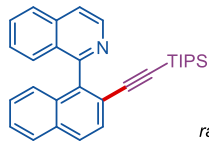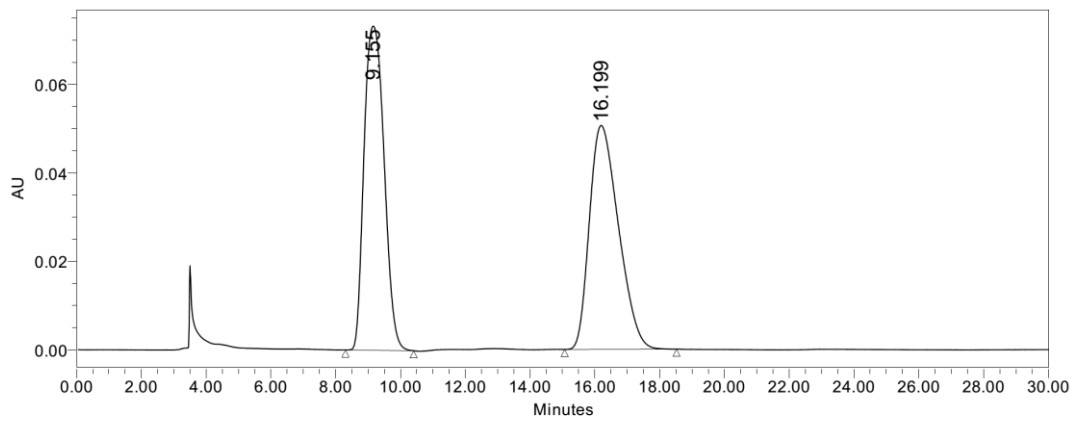

|   | RT     | Area    | % Area | Height |
|---|--------|---------|--------|--------|
| 1 | 9.155  | 3160022 | 50.05  | 73275  |
| 2 | 16.199 | 3154141 | 49.95  | 50608  |

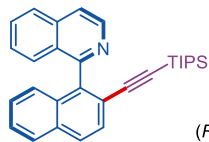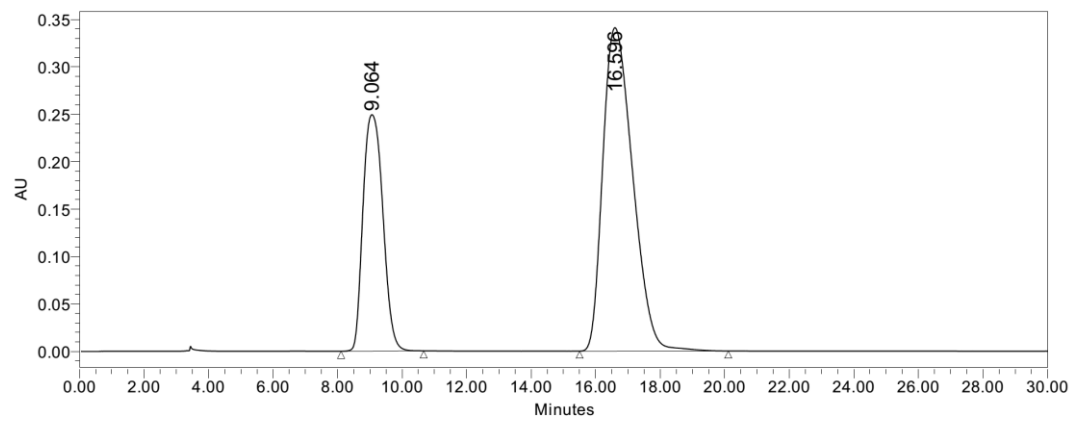

|   | RT     | Area     | % Area | Height |
|---|--------|----------|--------|--------|
| 1 | 9.064  | 10690692 | 32.77  | 249309 |
| 2 | 16.596 | 21927962 | 67.23  | 341028 |



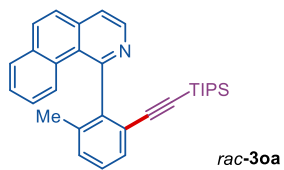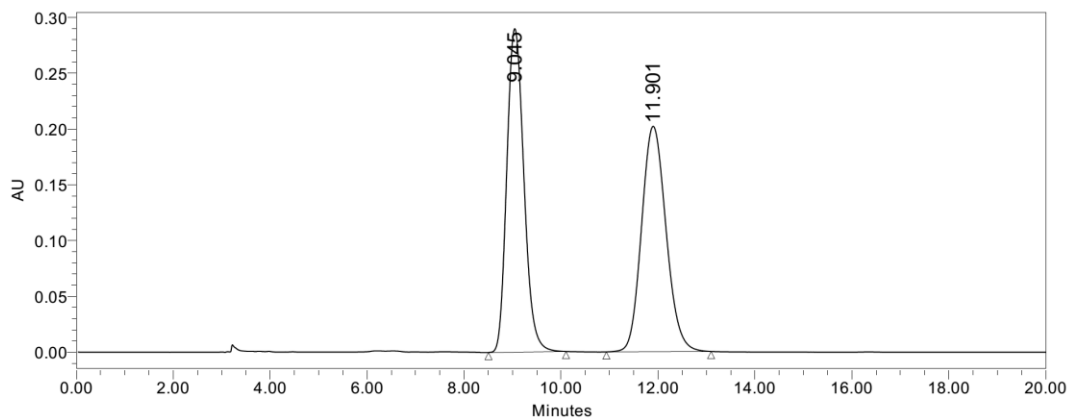

|   | RT     | Area    | % Area | Height |
|---|--------|---------|--------|--------|
| 1 | 9.045  | 7105393 | 50.05  | 289881 |
| 2 | 11.901 | 7090971 | 49.95  | 202039 |

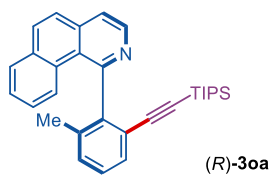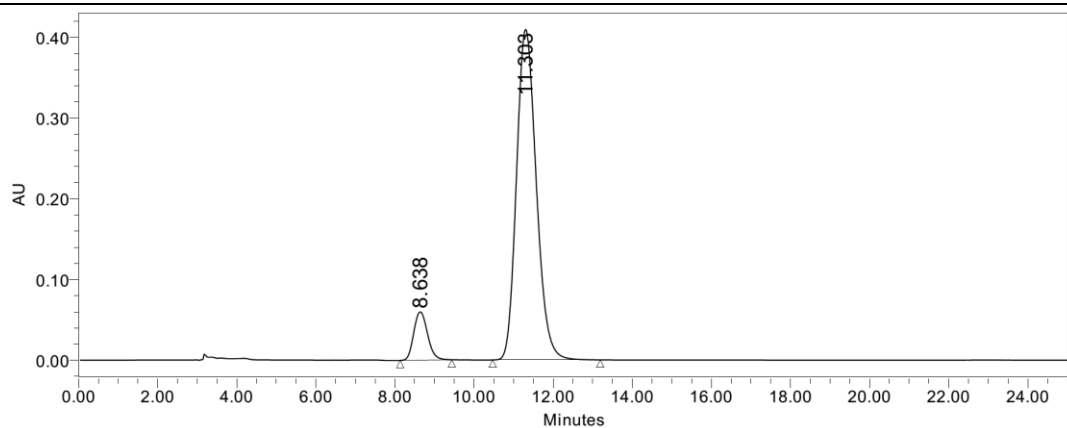

|   | RT     | Area     | % Area | Height |
|---|--------|----------|--------|--------|
| 1 | 8.638  | 1447979  | 9.24   | 59826  |
| 2 | 11.303 | 14226155 | 90.76  | 409507 |

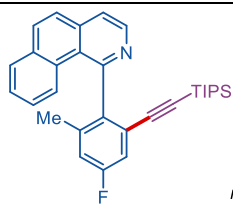

*rac*-3pa

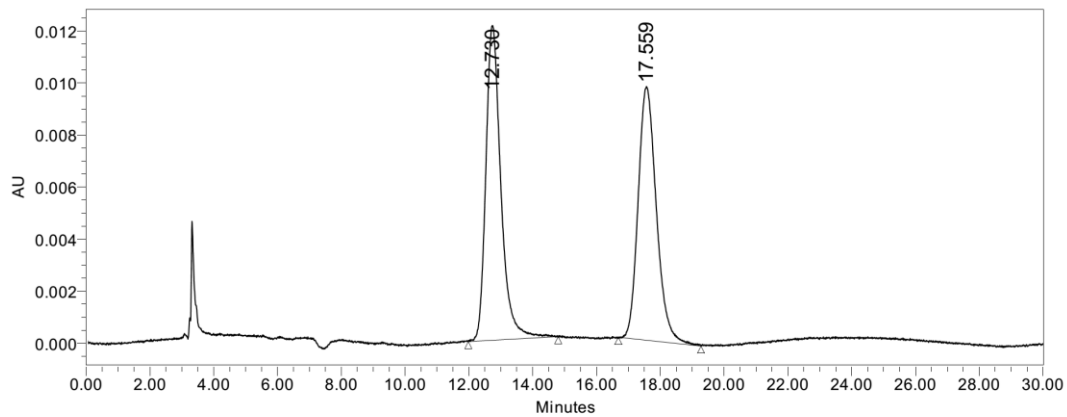

|   | RT     | Area   | % Area | Height |
|---|--------|--------|--------|--------|
| 1 | 12.730 | 396920 | 50.66  | 12091  |
| 2 | 17.559 | 386572 | 49.34  | 9745   |

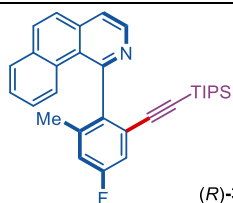

*(R)*-3pa

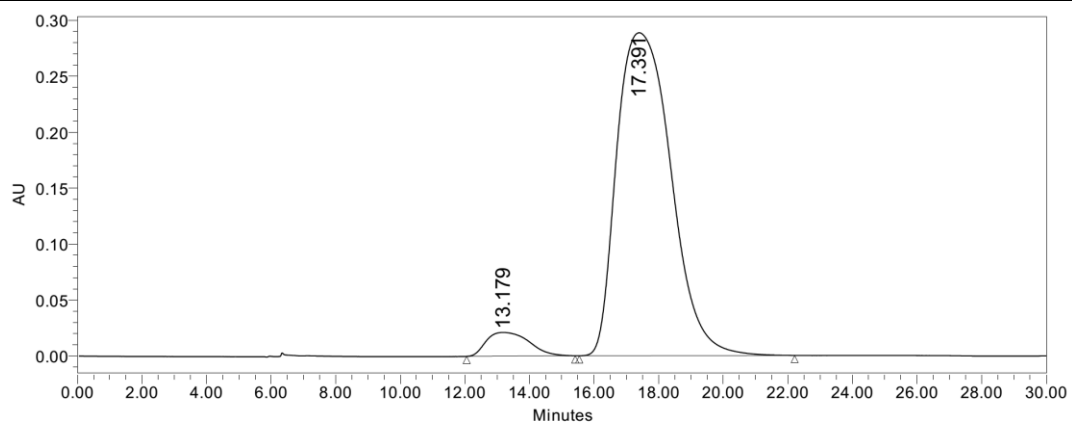

|   | RT     | Area     | % Area | Height |
|---|--------|----------|--------|--------|
| 1 | 13.179 | 1950695  | 5.46   | 21205  |
| 2 | 17.391 | 33754725 | 94.54  | 288556 |

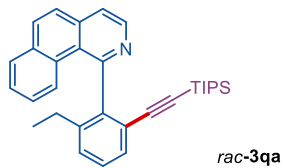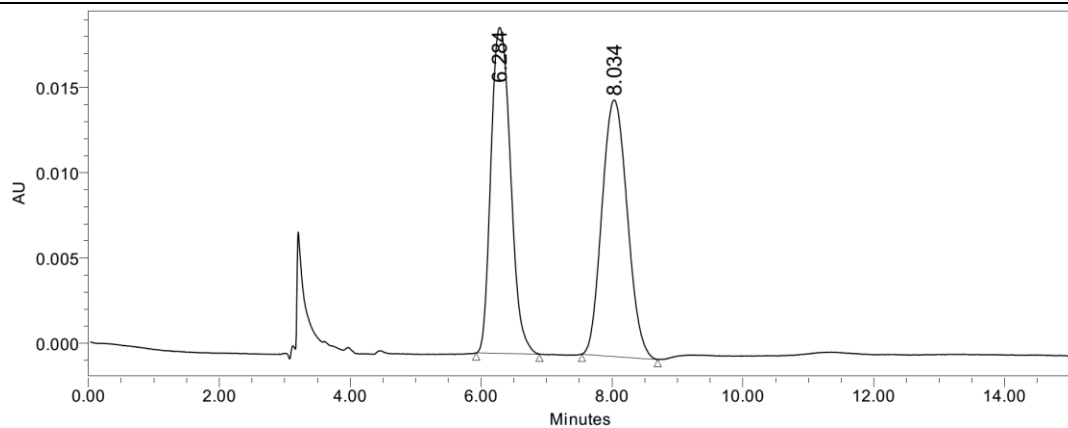

|   | RT    | Area   | % Area | Height |
|---|-------|--------|--------|--------|
| 1 | 6.284 | 397445 | 49.50  | 19127  |
| 2 | 8.034 | 405549 | 50.50  | 15062  |

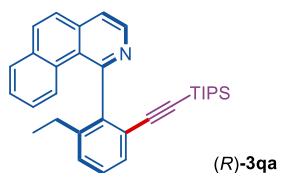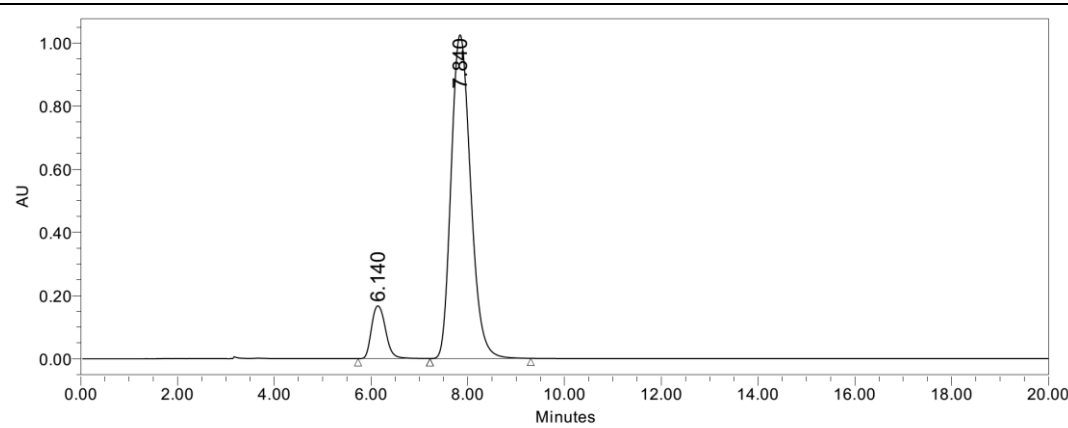

|   | RT    | Area     | % Area | Height  |
|---|-------|----------|--------|---------|
| 1 | 6.140 | 3376978  | 10.52  | 167034  |
| 2 | 7.840 | 28712784 | 89.48  | 1024835 |

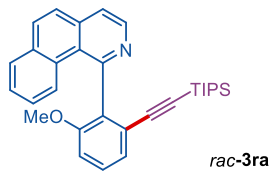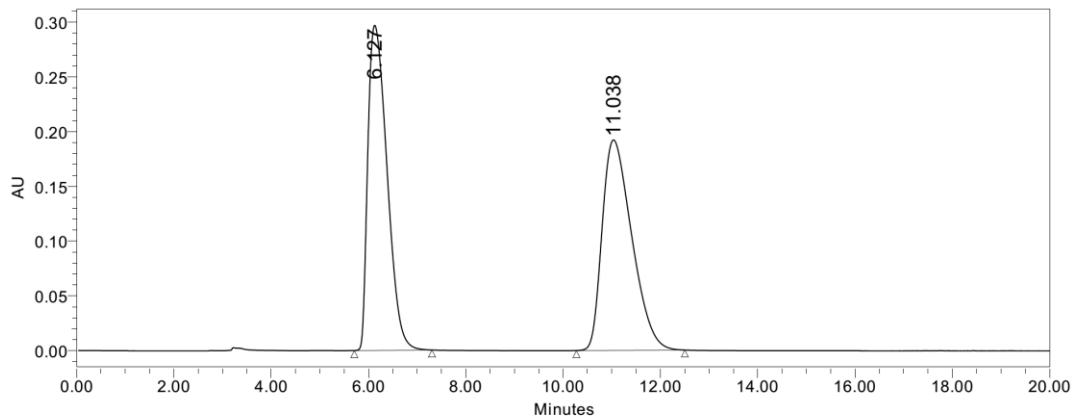

|   | RT     | Area    | % Area | Height |
|---|--------|---------|--------|--------|
| 1 | 6.127  | 8133941 | 50.02  | 296995 |
| 2 | 11.038 | 8126198 | 49.98  | 192215 |

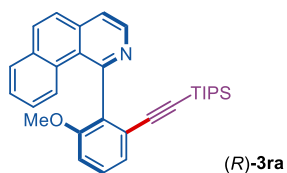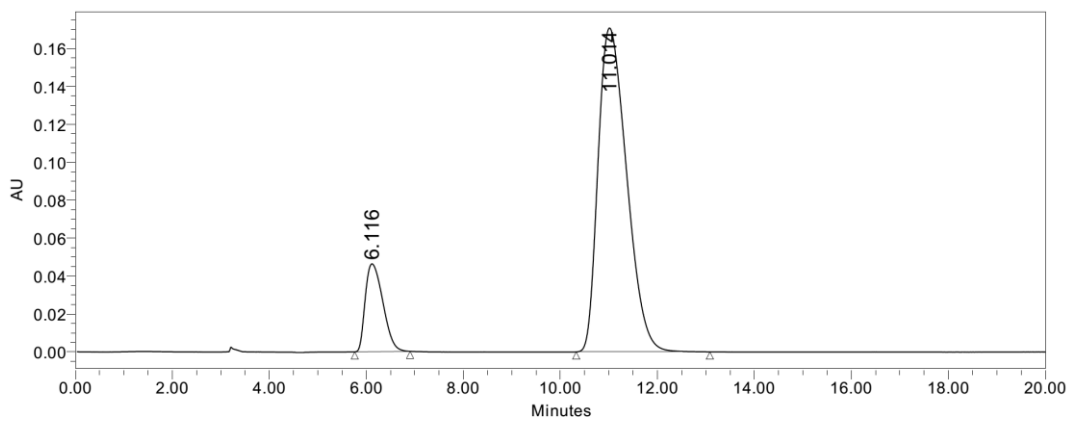

|   | RT     | Area    | % Area | Height |
|---|--------|---------|--------|--------|
| 1 | 6.116  | 1168656 | 14.33  | 46345  |
| 2 | 11.014 | 6988256 | 85.67  | 170860 |

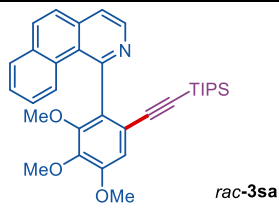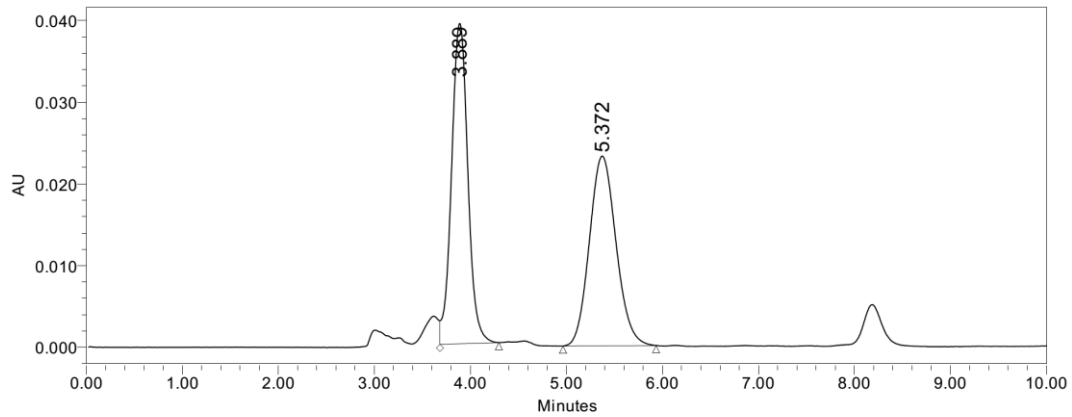

|   | RT    | Area   | % Area | Height |
|---|-------|--------|--------|--------|
| 1 | 3.889 | 462378 | 50.80  | 39195  |
| 2 | 5.372 | 447807 | 49.20  | 23226  |

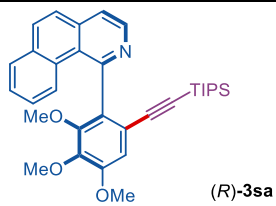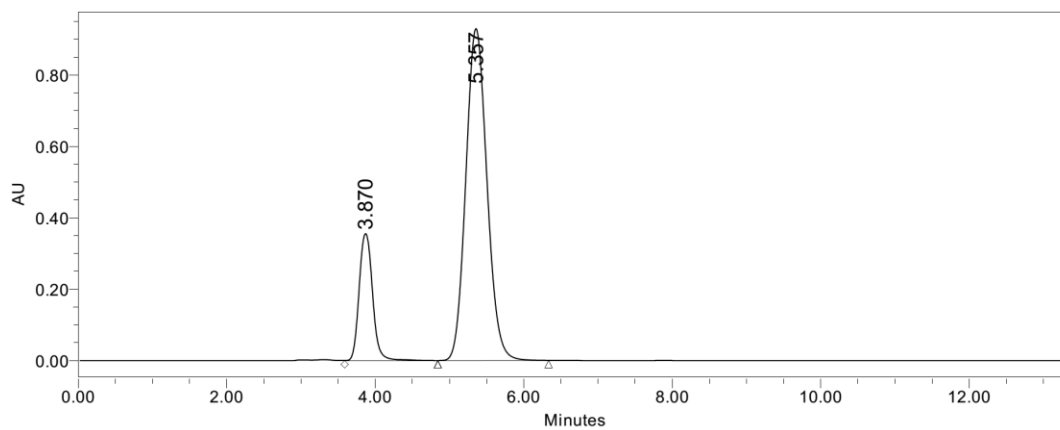

|   | RT    | Area     | % Area | Height |
|---|-------|----------|--------|--------|
| 1 | 3.870 | 4464980  | 19.55  | 355666 |
| 2 | 5.357 | 18372461 | 80.45  | 930133 |

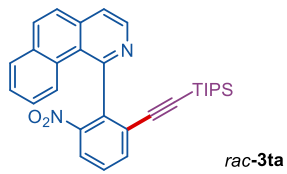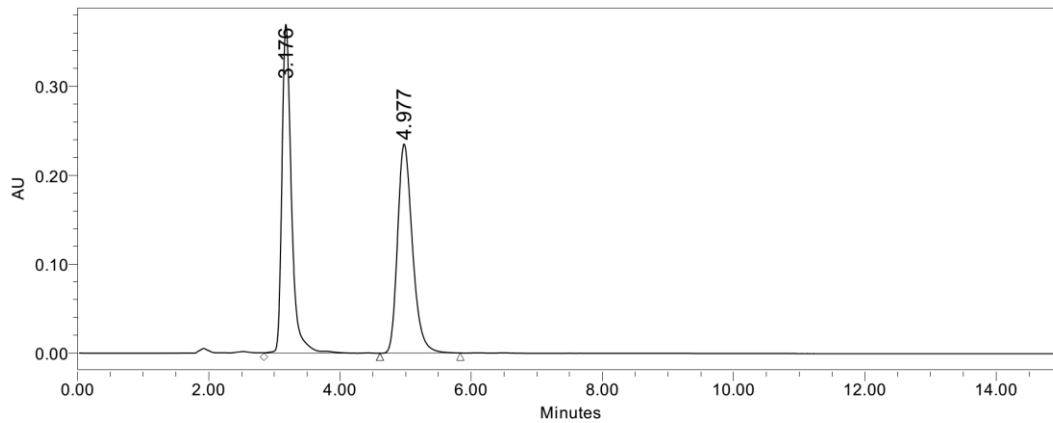

|   | RT    | Area    | % Area | Height |
|---|-------|---------|--------|--------|
| 1 | 3.176 | 3742041 | 50.24  | 369800 |
| 2 | 4.977 | 3706451 | 49.76  | 235140 |

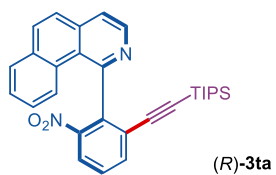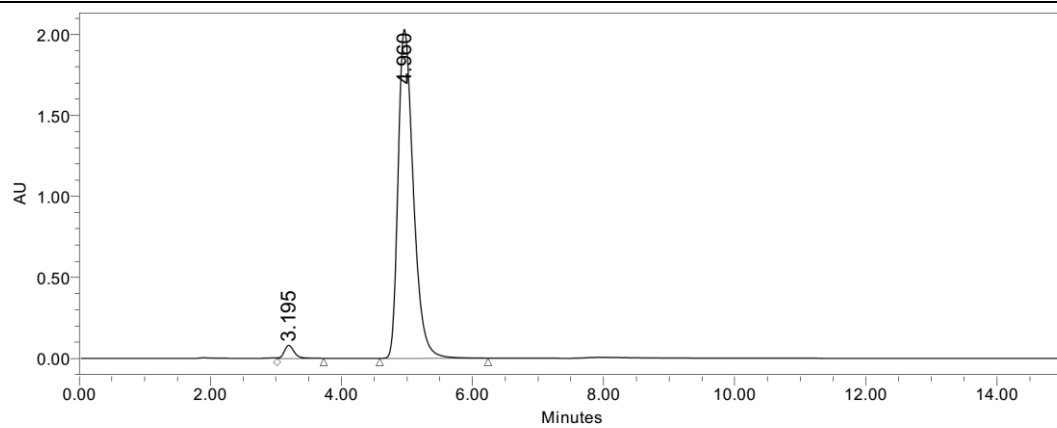

|   | RT    | Area     | % Area | Height  |
|---|-------|----------|--------|---------|
| 1 | 3.195 | 824972   | 2.45   | 80001   |
| 2 | 4.960 | 32817075 | 97.55  | 2031801 |

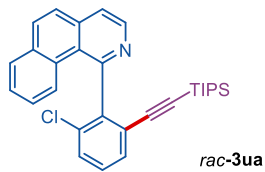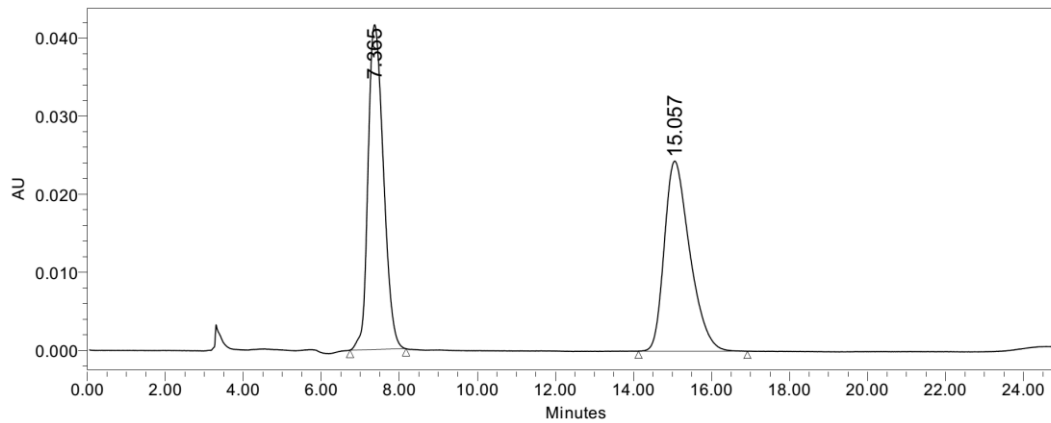

|   | RT     | Area    | % Area | Height |
|---|--------|---------|--------|--------|
| 1 | 7.365  | 1138788 | 50.75  | 41585  |
| 2 | 15.057 | 1105319 | 49.25  | 24343  |

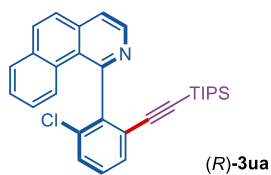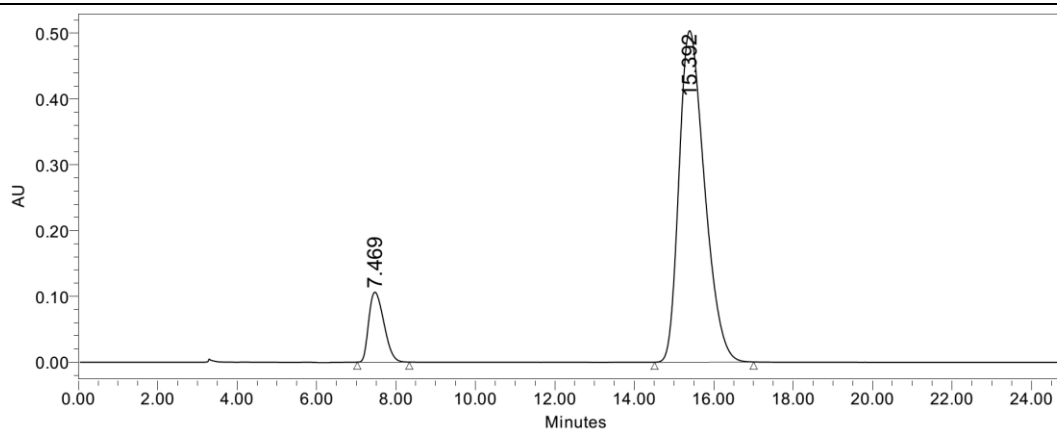

|   | RT     | Area     | % Area | Height |
|---|--------|----------|--------|--------|
| 1 | 7.469  | 2813011  | 11.12  | 106315 |
| 2 | 15.392 | 22485061 | 88.88  | 503759 |

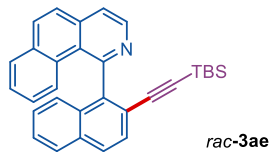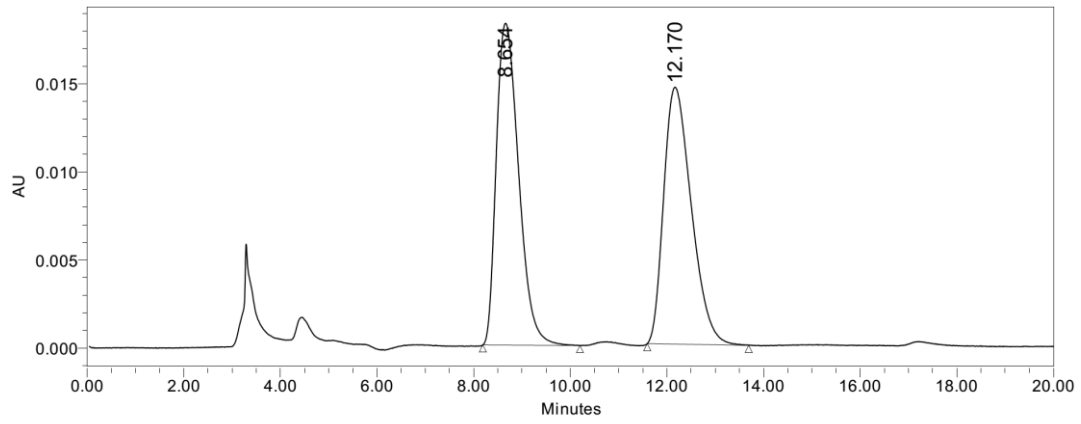

|   | RT     | Area   | % Area | Height |
|---|--------|--------|--------|--------|
| 1 | 8.654  | 587322 | 50.32  | 18275  |
| 2 | 12.170 | 579799 | 49.68  | 14595  |

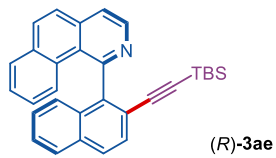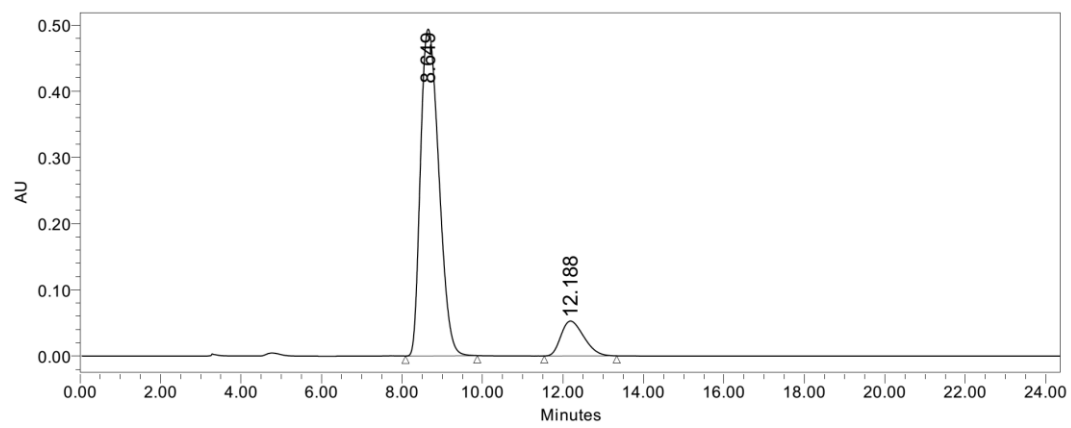

|   | RT     | Area     | % Area | Height |
|---|--------|----------|--------|--------|
| 1 | 8.649  | 15608237 | 88.24  | 493690 |
| 2 | 12.188 | 2079315  | 11.76  | 52641  |



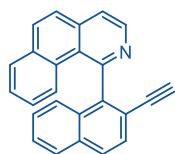

rac-4

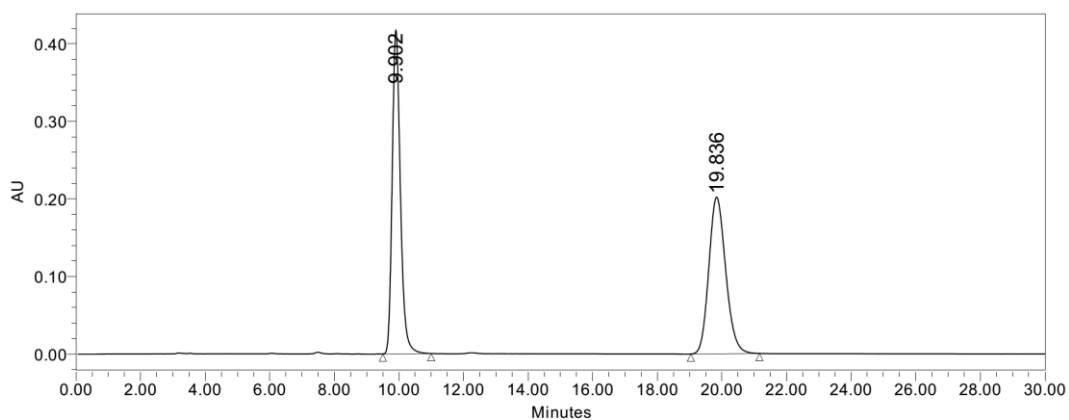

|   | RT     | Area    | % Area | Height |
|---|--------|---------|--------|--------|
| 1 | 9.902  | 7359693 | 50.14  | 417345 |
| 2 | 19.836 | 7318944 | 49.86  | 201933 |

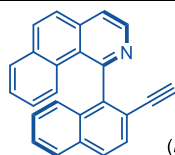

(R)-4

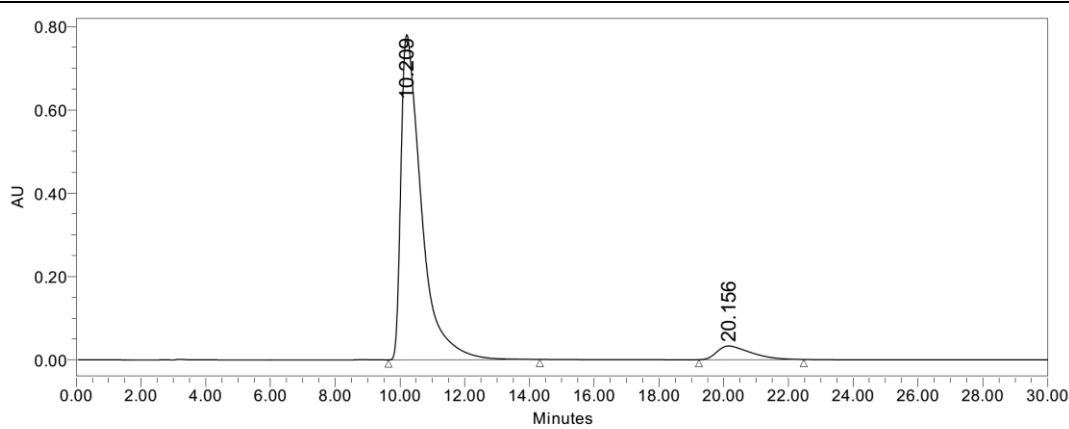

|   | RT     | Area     | % Area | Height |
|---|--------|----------|--------|--------|
| 1 | 10.209 | 34197657 | 93.53  | 780719 |
| 2 | 20.156 | 2367137  | 6.47   | 32786  |

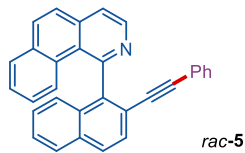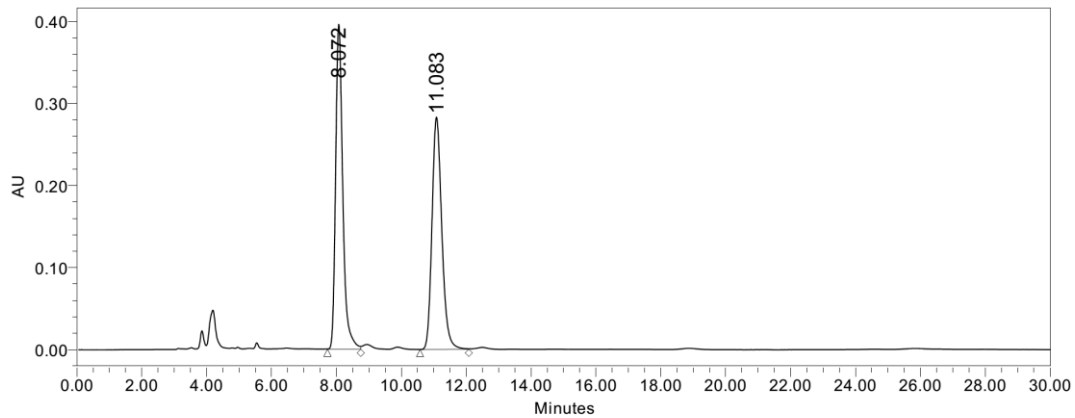

|   | RT     | Area    | % Area | Height |
|---|--------|---------|--------|--------|
| 1 | 8.072  | 6044165 | 50.45  | 395704 |
| 2 | 11.083 | 5935812 | 49.55  | 282951 |

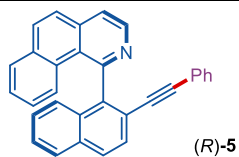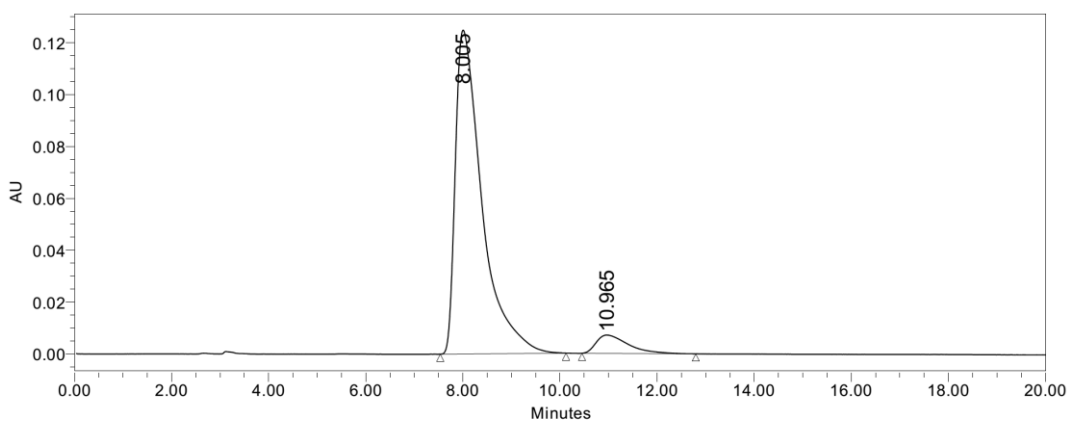

|   | RT     | Area    | % Area | Height |
|---|--------|---------|--------|--------|
| 1 | 8.005  | 4740524 | 93.62  | 124928 |
| 2 | 10.965 | 323087  | 6.38   | 7063   |

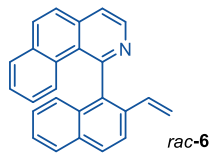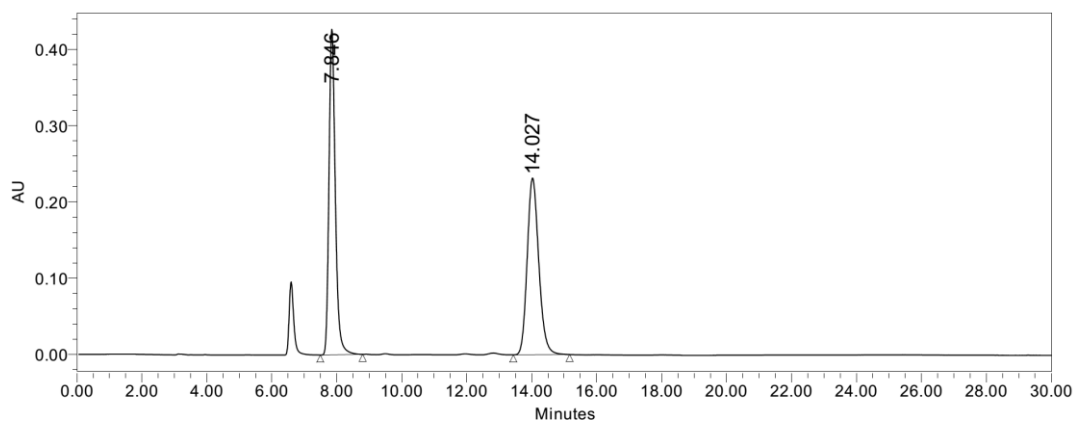

|   | RT     | Area    | % Area | Height |
|---|--------|---------|--------|--------|
| 1 | 7.846  | 5795399 | 50.22  | 427210 |
| 2 | 14.027 | 5744063 | 49.78  | 231861 |

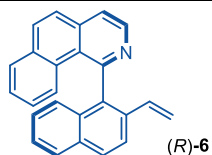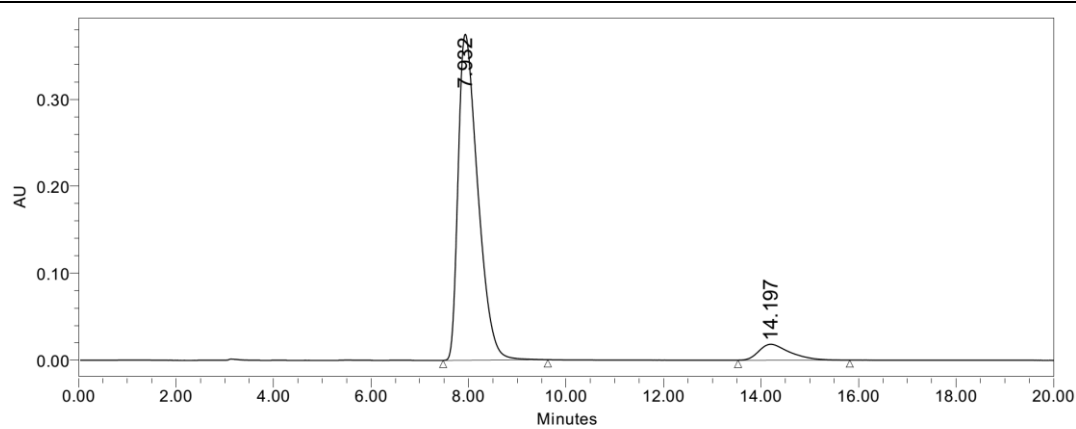

|   | RT     | Area     | % Area | Height |
|---|--------|----------|--------|--------|
| 1 | 7.932  | 10469640 | 92.85  | 374802 |
| 2 | 14.197 | 805893   | 7.15   | 18281  |

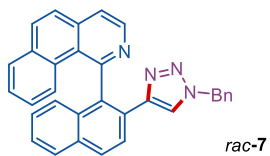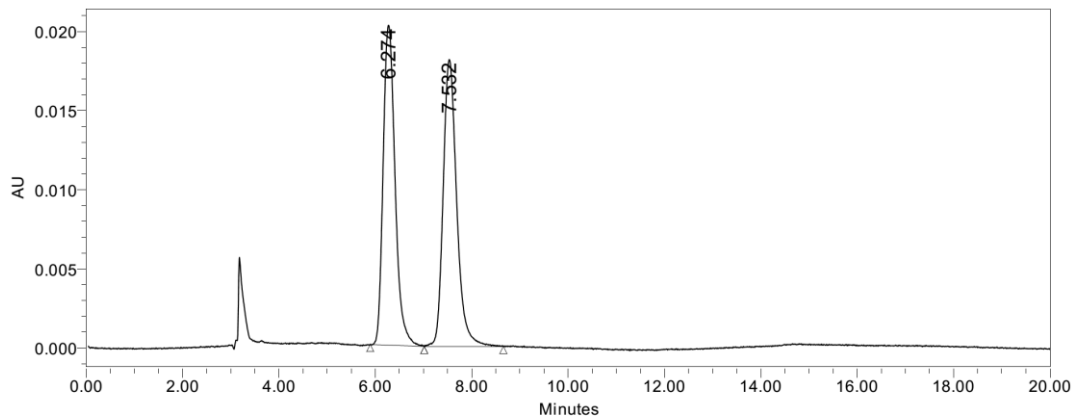

|   | RT    | Area   | % Area | Height |
|---|-------|--------|--------|--------|
| 1 | 6.274 | 346694 | 49.53  | 20214  |
| 2 | 7.532 | 353240 | 50.47  | 18125  |

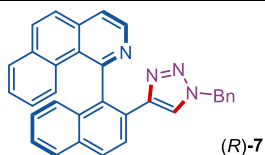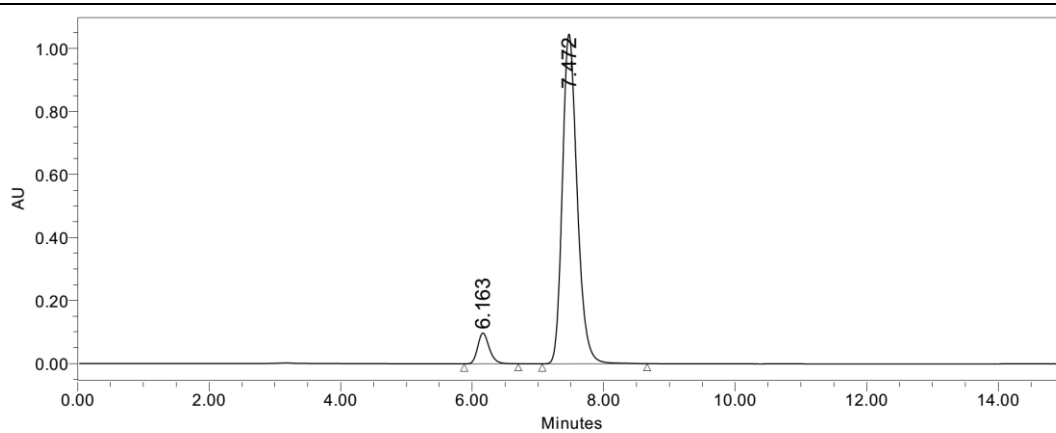

|   | RT    | Area     | % Area | Height  |
|---|-------|----------|--------|---------|
| 1 | 6.163 | 1194367  | 6.80   | 97660   |
| 2 | 7.472 | 16371904 | 93.20  | 1046273 |

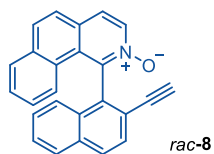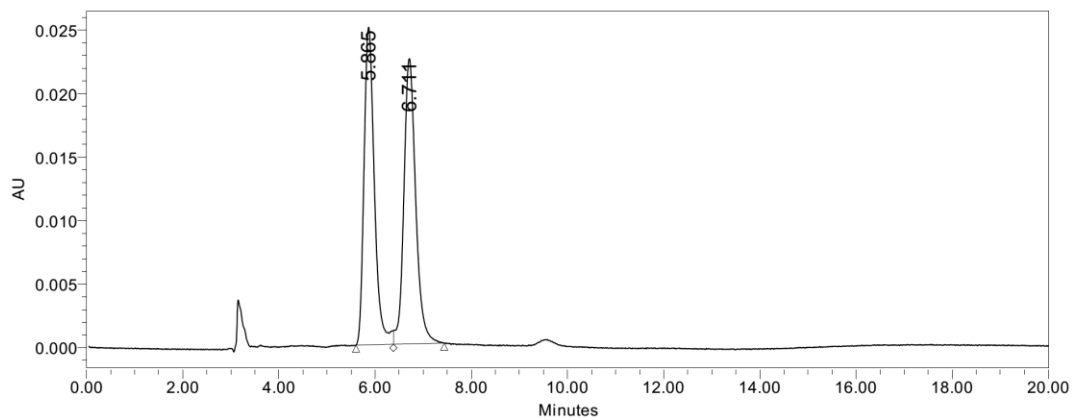

|   | RT    | Area   | % Area | Height |
|---|-------|--------|--------|--------|
| 1 | 5.865 | 374549 | 49.40  | 25006  |
| 2 | 6.711 | 383668 | 50.60  | 22471  |

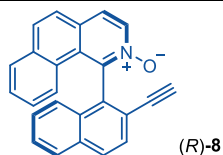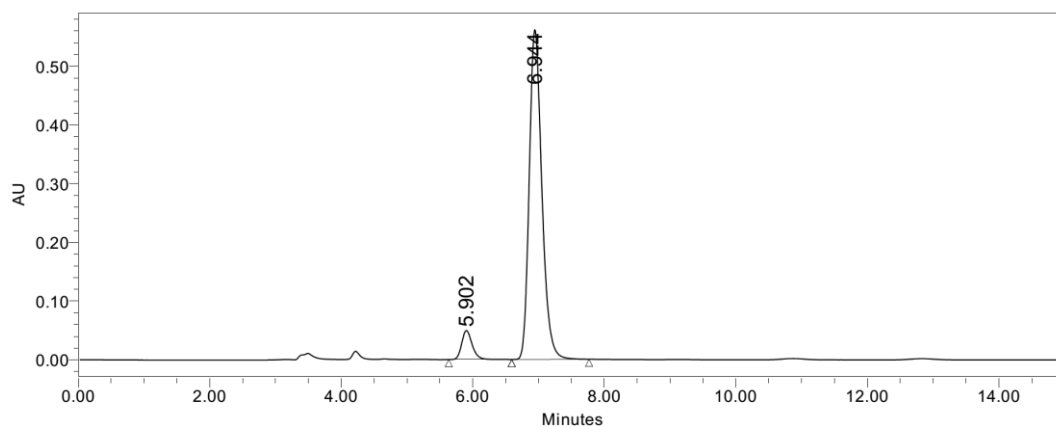

|   | RT    | Area    | % Area | Height |
|---|-------|---------|--------|--------|
| 1 | 5.902 | 550896  | 6.87   | 49407  |
| 2 | 6.944 | 7470770 | 93.13  | 561686 |
